# Supplementary material for: Theoretical evaluation of the carbene-based site-selectivity in gold(iii)-catalyzed annulations of alkynes with anthranils
Source: Royal Society of Chemistry journal article supplement (doi:10.1039/d0cc07440c), 2020-12-23
Supplement: d0cc07440c1.pdf [file d0cc07440c1.pdf]

## *Supporting Information*

### **Theoretical Evaluation of the Carbene-Based Site-Selectivity in Gold(III)- Catalyzed Annulations of Alkynes with Anthranils**

Kaifeng Wang<sup>a</sup>, Qiao Wu<sup>a</sup>, Siwei Bi<sup>\*a</sup>, Lingjun Liu<sup>a</sup>, Guang Chen<sup>a,b</sup>, Yulin Li<sup>c</sup>, Tony D.

James<sup>\*d, e</sup>, Yuxia Liu<sup>\*a</sup>

<sup>a</sup> School of Chemistry and Chemical Engineering, Qufu Normal University, Qufu, 273165, P. R. China.

<sup>b</sup> Ministry of Education, Key Laboratory of Hainan Trauma and Disaster Rescue, College of Emergency and Trauma, Hainan Medical University, Haikou 571199, China.

<sup>c</sup> Key Laboratory of Tibetan Medicine Research & Qinghai Key Laboratory of Qinghai-Tibet Plateau Biological Resources, Northwest Institute of Plateau Biology, Chinese Academy of Science, Xining 810001, Qinghai P. R. China.

<sup>d</sup> Department of Chemistry, University of Bath, Bath, UK BA2 7AY.

<sup>e</sup> School of Chemistry and Chemical Engineering, Henan Normal University, Xinxiang 453007, P. R. China.

E-mail: liuyuxia2008@163.com; siweibi@126.com; chstdj@bath.ac.uk

### **Contents**

|                                                    |                 |
|----------------------------------------------------|-----------------|
| <b>1. Computational details</b> .....              | <b>S2-S4</b>    |
| <b>2. Table S1 and Figures S1-S6</b> .....         | <b>S5-S11</b>   |
| <b>3. Cartesian Coordinates and Energies</b> ..... | <b>S12-S118</b> |

## Computational Details

All DFT calculations were carried out with the Gaussian 09 programs.<sup>1</sup> The geometries of all stationary points were fully optimized at the B3LYP<sup>2</sup> level in gas phase with SDD<sup>3</sup> basis set for Au atom and 6-31g (d) basis set for all other atoms. Vibrational frequencies were conducted at the same level of theory to verify all stationary points as local minima (zero imaginary frequencies) or first-order saddle points (one imaginary frequency) and the free energies were provided at 298.15 K. IRC<sup>4</sup> calculations have been also performed to ensure that all transition-state structures connected two relevant minima. The solvent effects of DCE were evaluated by single-point calculations employing a self-consistent reaction field (SCRF) method<sup>5</sup> with the PCM model<sup>6</sup> at the M06<sup>7</sup> level, in which the 6-311+g(d,p) basis set is used for the non-metallic atoms and SDD basis set for Au. To confirm the reliability of B3LYP//M06 method for describing the present system, we have implemented benchmark calculations for crucial selective-determining transition states, including **TS3-5** and **TS3-4** in Fig. S1, **TS3'-5'** and **TS3'-4'** in Fig. S3, and **TS15-16** and **TS15-20** in Fig. S2 by using PBE0,<sup>8</sup> WB97XD,<sup>9</sup> and M06-2X-D3<sup>10</sup> functionals with different basis sets, respectively. The computed energy differences for two selective-determining stationary points in three catalytic systems, **TS3-5 – TS3-4**, **TS3'-5' – TS3'-4'**, and **TS15-16 – TS15-20**, are displayed in Table S1 in the Supporting Information. All the functionals are found to give comparable energy differences and consistent trends.

These facts ensure the quality and accuracy of the B3LYP//M06 method used in the system under study.

## References

1 Frisch, M.J.; Trucks, G.W.; Schlegel, H.B.; Scuseria, G. E.; Robb, M.A.; Cheeseman, J.R.; Scalmani, G.; Barone, V.; Mennucci, B.; Petersson, G.A.; Nakatsuji, H.; Caricato, M.; Li, X.; Hratchian, H. P.; Izmaylov, A. F.; Bloino, J.; Zheng, G.; Sonnenberg, J. L.; Hada, M.; Ehara, M.; Toyota, K.; Fukuda, R.; Hasegawa, J.; Ishida, M.; Nakajima, T.; Honda, Y.; Kitao, O.; Nakai, H.; Vreven, T.; Montgomery, J. A., Jr.; Peralta, J. E.; Ogliaro, F.; Bearpark, M.; Heyd, J. J.; Brothers, E.; Kudin, K. N.; Staroverov, V. N.; Kobayashi, R.; Normand, J.; Raghavachari, K.; Rendell, A.; Burant, J. C.; Iyengar, S. S.; Tomasi, J.; Cossi, M.; Rega, N.; Millam, J. M.; Klene, M.; Knox, J. E.; Cross, J. B.; Bakken, V.; Adamo, C.; Jaramillo, J.; Gomperts, R.; Stratmann, R. E.; Yazyev, O.; Austin, A. J.; Cammi, R.; Pomelli, C.; Ochterski, J. W.; Martin, R. L.; Morokuma, K.; Zakrzewski, V.G.; Voth, G.A.; Salvador, P.; Dannenberg, J.J.; Dapprich, S.; Daniels, A. D.; Farkas, O.; Foresman, J. B.; Ortiz, J. V.; Cioslowski, J.; Fox, D. J. Gaussian 09, revision D.01; Gaussian, Inc., Wallingford, CT, 2009.

2 (a) C. Lee, W. Yang and R. G. Parr, *Phys. Rev. B.*, 1988, **37**, 785; (b) B. Michlich, A. Savin, H. Stoll and H. Preuss, *Chem. Phys. Lett.*, 1989, **157**, 200; (c) A. D. Becke, *J. Chem. Phys.*, 1993, **98**, 5648; (d) P. J. Stephens, F. J. Devlin and M. J. Frisch, *J. Phys. Chem.*, 1994, **98**, 11623.

- 3 (a) M. Dolg, U. Wedig, H. Stoll and H. Preuss, *J. Chem. Phys.*, 1987, **86**, 866; (b) D. Andrae, U. Häussermann, M. Dolg, H. Stoll and H. Preuss, *Theor. Chim. Acta.*, 1990, **77**, 123.
- 4 (a) K. Fukui, *J. Phys. Chem.*, 1970, **74**, 4161; (b) K. Fukui, *Acc. Chem. Res.*, 1981, **14**, 363.
- 5 J. Tomasi and M. Persico, *Chem. Rev.*, 1994, **94**, 2027.
- 6 (a) V. Barone, M. Cossi and J. Tomasi, *J. Comput. Chem.*, 1998, **19**, 404; (b) M. Cossi, V. Barone, R. Cammi and J. Tomasi, *Chem. Phys. Lett.*, 1996, **255**, 327.
- 7 (a) Y. Zhao and D. G. Truhlar, *Theor. Chem. Acc.*, 2008, **120**, 215; (b) Y. Zhao and D. G. Truhlar, *Acc. Chem. Res.*, 2008, **41**, 157.
- 8 C. Adamo and V. J. Barone, *Chem. Phys.*, 1999, **110**, 6158.
- 9 J. -D. Chai and M. Head-Gordon, *Phys. Chem. Chem. Phys.*, 2008, **10**, 6615.
- 10 Y. Ji, J. Zheng, D. Qin, Y. Li, Y. Gao, M. Yao, X. Chen, G. Li, T. An and R. Zhang, *Environ. Sci. Technol.*, 2018, **52**, 11169

**Table S1** Calculated free-energy differences (kcal mol<sup>-1</sup>) calculated using different functions and basis sets for the energy differences of two crucial selective-determining transition states in three catalytic systems.

|              |                              | TS3-5–TS3-4 | TS3'-5'–TS3'-4' | TS15-16–TS15-20 |
|--------------|------------------------------|-------------|-----------------|-----------------|
| Optimization | B3LYP// Single-point M06     | -3.2        | 6.3             | -6.2            |
| Optimization | B3LYP <sup>a</sup> //lanl2dz | -4.8        | 4.5             | -2.7            |
|              | PBE0 <sup>a</sup> //lanl2dz  | -2.1        | 3.2             | -3.8            |
| Single-point | WB97XD <sup>b</sup> //SDD    | -3.1        | 3.6             | -5.9            |
|              | M06-2X-D3 <sup>b</sup> //SDD | -3.8        | 1.9             | -6.3            |

<sup>a</sup> 6-31G (d, p) for C, H, O, and N atoms in the gas phase.

<sup>b</sup> 6-311+G(d, p) for C, H, O, and N atoms.

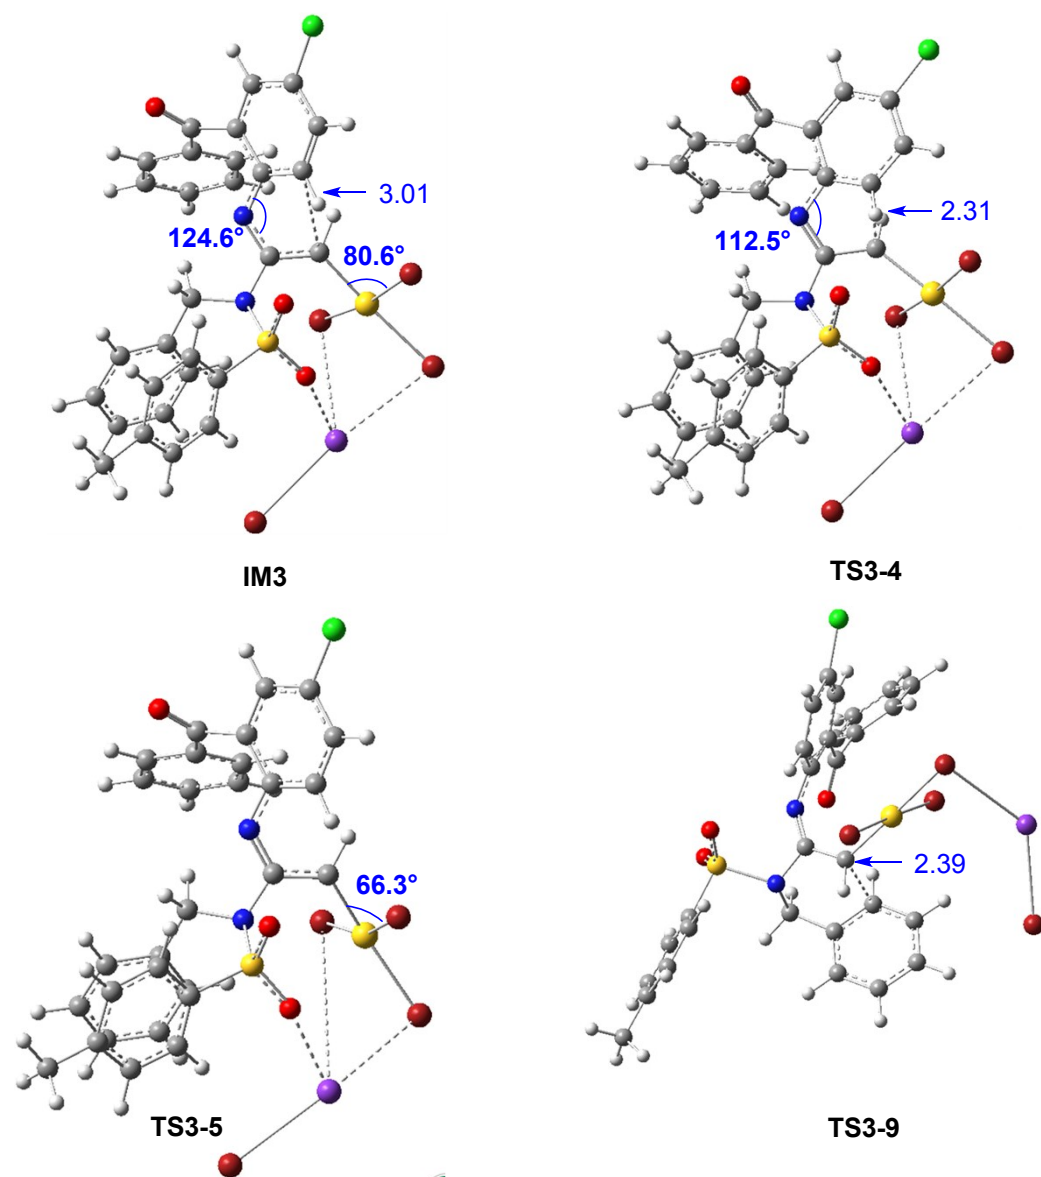

**Fig. S1** Optimized structures with selected structural parameters for key stationary points shown in Fig. 1. The bond distance and bond angle are given in Å and °, respectively.

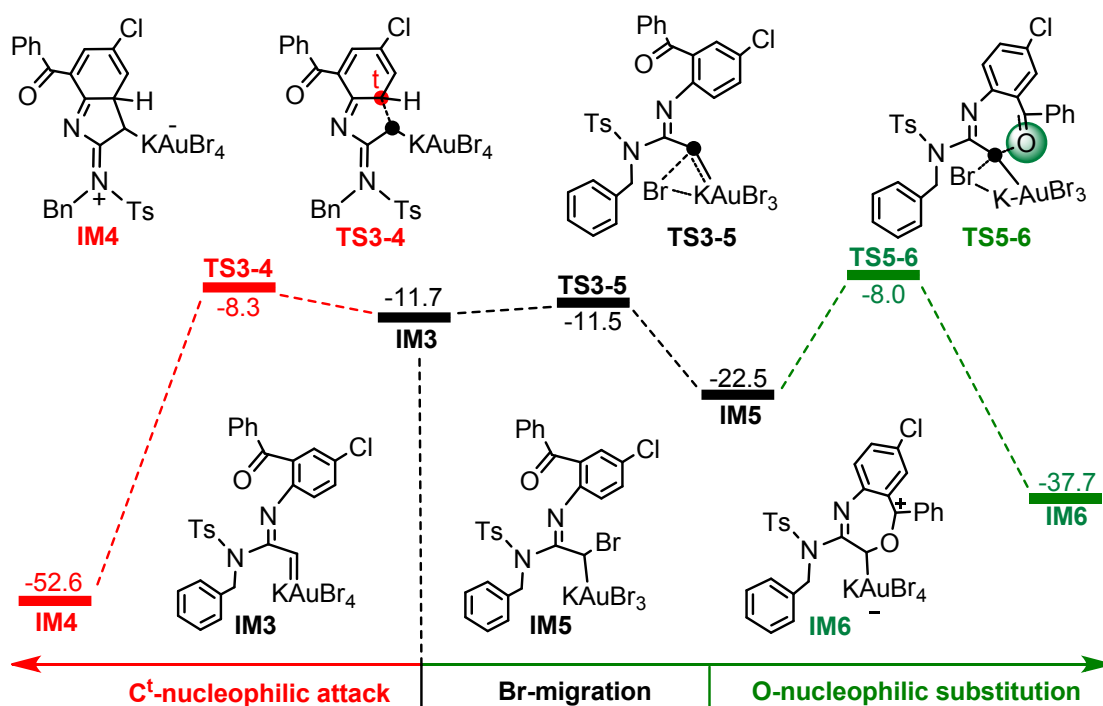

**Fig. S2** Calculated free energy profile in DCE solvent for a-imino gold carbene electrophilic addition step along potential pathways in the **1a**-system. The relative free energies are given in kcal mol<sup>-1</sup>.

For the **1a** system, starting from **IM3**, the reaction can possibly undergo either direct C<sup>t</sup>-nucleophilic attack via **TS3-4** or Br-migration (**TS3-5**) followed by O-nucleophilic substitution (**TS5-6**). The two selective-determining transition states, **TS3-4** and **TS5-6** are found to be energetically comparable (-8.3 and -8.0 kcal mol<sup>-1</sup>), both of which, however, are less stable in energy than **TS3-5** in Fig. 1 (-11.5 kcal mol<sup>-1</sup>). Therefore, these two competitive pathways are theoretically ruled out. (Fig. S2)

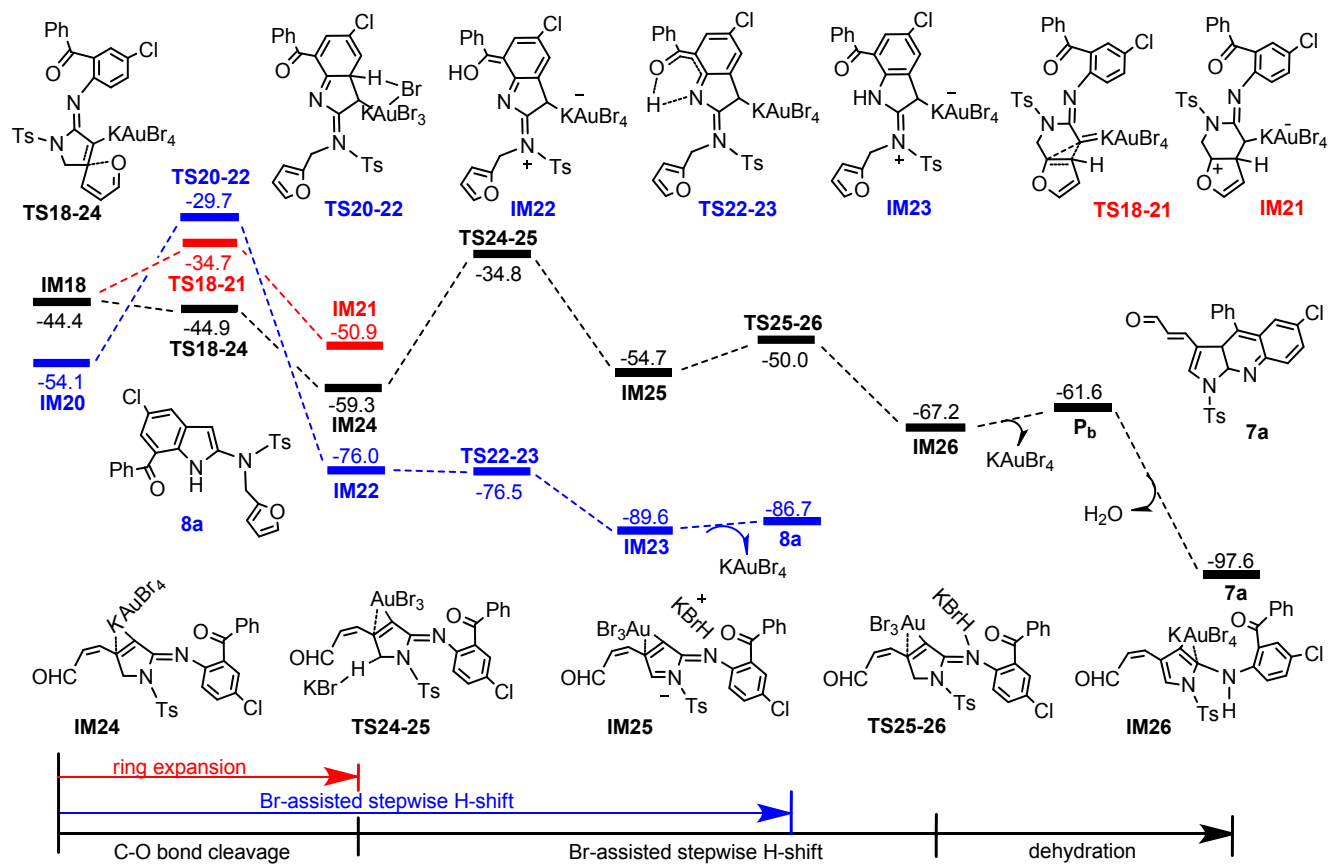

**Fig. S3** Calculated free energy profiles in DCE solvent for possible pathways starting from **IM18** and **IM20**, respectively (**1b**-system). The relative free energies are given in kcal mol<sup>-1</sup>.



For the **1b** annulation, from **IM18**, the alternative ring expansion through C(Au)-migration (**TS18-21**, Fig.S3) was also explored and found to be energetically disfavored over C<sup>b</sup>-O cleavage via **TS18-24** (-34.7 vs -44.9 kcal mol<sup>-1</sup>). The calculated NBO charges demonstrate that the stronger electrostatic attraction involved in **TS18-24** facilitates the C<sup>b</sup>-O bond rupture, thereby producing a relatively lower energy requirement. (Fig. S3)

In addition, after C<sup>t</sup>-nucleophilic attack of **IM15** to give **IM20** (blue line, Fig. S4), the stepwise Br-assisted H-shift is possibly followed, from which the 7-acylindole product **8a** is obtained, and simultaneously, KAuBr<sub>4</sub> is regenerated (Fig. S3). Unfortunately, the Br-assisted H-abstraction process via **TS20-22** is 15.2 kcal mol<sup>-1</sup> higher as compared to C<sup>b</sup>-O cleavage (**TS18-24**, black line). Consequently, the alternative C<sup>t</sup>-nucleophilic attack pathway is kinetically unfavored (Fig. S3).

For the **1b** system, we also examined the direct C<sup>b</sup>- and C<sup>t</sup>-nucleophilic attack of **IM15** (pink- and blue- line, respectively), as well as the nucleophilic substitution of the carbonyl O atom from **IM16** (red line), all of which are computed to be unfavorable over the pathway along Br-migration → N-donation/abstraction substitution (black line) due to higher energy demands involved (Fig. S4)

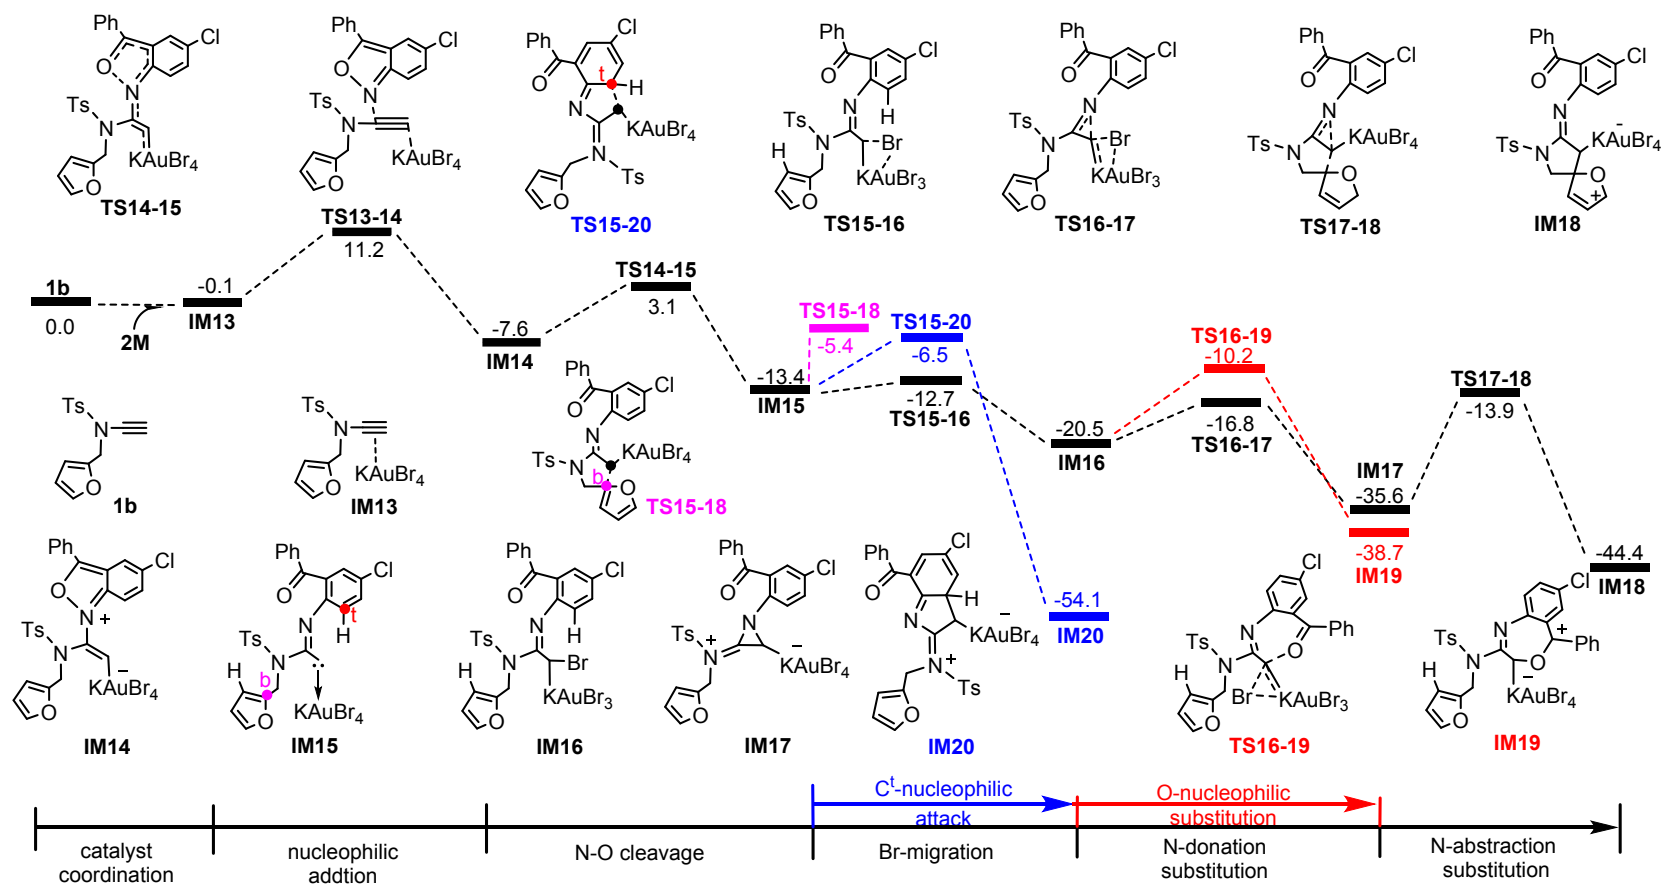

**Fig. S4** Calculated free energy profiles in DCE solvent for all possible pathways from the  $\text{KAuBr}_3$ -catalyzed annulation reaction of **1b** with **2M** (**1b**-system). The relative free energies are given in  $\text{kcal mol}^{-1}$ .

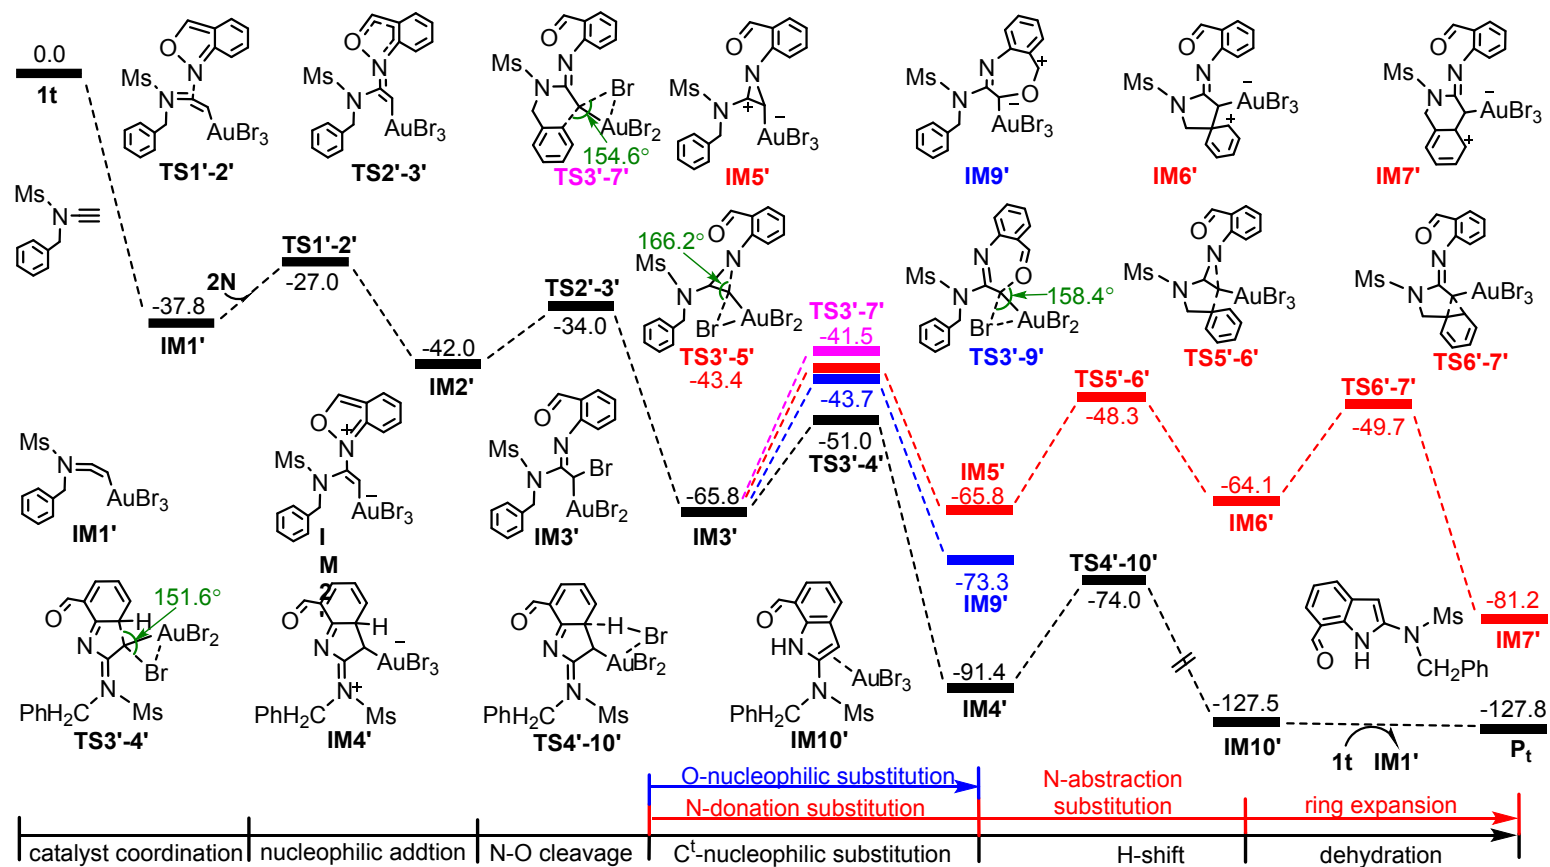

**Fig. S5** Calculated free energy profiles in DCE solvent for all possible pathways from AuBr<sub>3</sub>-catalyzed annulation of **1t** and **2b** (**1t**-system). The relative free energies are given in kcal mol<sup>-1</sup> and the bond angles are given in °.

Similar to the **1a** system, for the **1t** system, a series of the possible pathways from **IM3'**—the N-donation substitution via **TS3'-5'** (-43.4 kcal mol<sup>-1</sup>), the C<sup>a</sup>-nucleophilic substitution via **TS3'-7'** (-41.5 kcal mol<sup>-1</sup>), and the O nucleophilic substitution via **TS3'-9'** (-43.7 kcal mol<sup>-1</sup>)—are examined and compared with the C<sup>t</sup>-nucleophilic substitution via **TS3'-4'** (-51.0 kcal mol<sup>-1</sup>). Clearly, in all these transition states, **TS3'-4'** exhibits the highest stability, which is predicted to be related to the weakest Br *trans*-influence involved with the Br-C(Au)-C<sup>t</sup> bond angle of 151.6°. In comparison, the Br-C(Au)-N bond angle in **TS3'-5'**, Br-C(Au)-C<sup>a</sup> bond angle in **TS3'-7'** and Br-C(Au)-O bond angle in **TS3'-9'** are 166.2°, 154.6° and 158.4°, respectively. As a result, the smallest *trans*-influence in **TS3'-4'** renders the C<sup>t</sup> attack the easiest (Fig. S5).

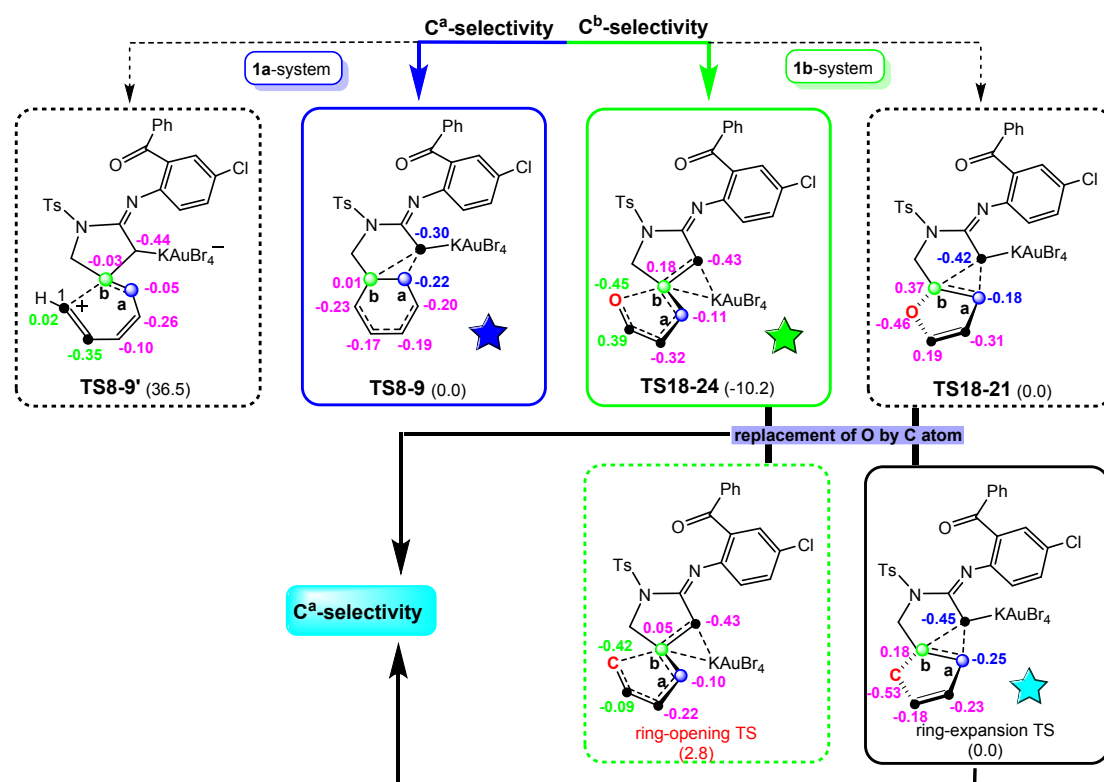

**Fig. S6** Calculated NBO charges (in e) for ring-opening transition state and ring-expansion transition states in **1a**-, **1b**-systems, and the system with the replacement of O by C atom. The relative free energies are given in kcal mol<sup>-1</sup>.

**Table S2** Calculated Gibbs free energies in the gas-phase using B3LYP functional, single-point HF energies in DCM solvent using M06 functional, and imaginary frequencies for all structures in the present work. The relative energies and the imaginary frequencies are given in Hartree and  $\text{cm}^{-1}$ , respectively.

| Structure                | Gibbs Free Energy (B3LYP gas-phase optimized calculation) | Solvation Energy (M06 single-point calculation) | Imaginary Frequency |
|--------------------------|-----------------------------------------------------------|-------------------------------------------------|---------------------|
| <b>1a</b>                | -1221.594638                                              | -1221.445757                                    |                     |
| <b>KAuBr<sub>4</sub></b> | -217.850853                                               | -217.6980519                                    |                     |
| <b>2M</b>                | -1090.155347                                              | -1089.983608                                    |                     |
| <b>IM1</b>               | -1439.46876                                               | -1439.163857                                    |                     |
| <b>TS1-2</b>             | -2529.604163                                              | -2529.158119                                    | -215.66             |
| <b>IM2</b>               | -2529.616048                                              | -2529.188087                                    |                     |
| <b>TS2-3</b>             | -2529.603121                                              | -2529.168868                                    | -226.52             |
| <b>IM3</b>               | -2529.618688                                              | -2529.191134                                    |                     |
| <b>TS3-9</b>             | -2529.60191                                               | -2529.183739                                    | -125.86             |
| <b>TS3-5</b>             | -2529.616548                                              | -2529.192621                                    | -57.47              |
| <b>IM5</b>               | -2529.632182                                              | -2529.209229                                    |                     |
| <b>TS5-7</b>             | -2529.621323                                              | -2529.201873                                    | -80.26              |
| <b>IM7</b>               | -2529.639126                                              | -2529.23108                                     |                     |
| <b>TS7-8</b>             | -2529.608464                                              | -2529.194208                                    | -209.92             |
| <b>IM8</b>               | -2529.628492                                              | -2529.219556                                    |                     |
| <b>TS8-9</b>             | -2529.612408                                              | -2529.19527                                     | -180.32             |
| <b>IM9</b>               | -2529.634218                                              | -2529.247041                                    |                     |
| <b>TS9-10</b>            | -2529.634894                                              | -2529.234866                                    | -243.48             |
| <b>IM10</b>              | -2529.690684                                              | -2529.28571                                     |                     |
| <b>TS10-11</b>           | -2529.689996                                              | -2529.281032                                    | -51.33              |
| <b>IM11</b>              | -2529.70456                                               | -2529.288047                                    |                     |
| <b>TS11-12</b>           | -2529.67725                                               | -2529.27215                                     | -110.24             |
| <b>IM12</b>              | -2529.700565                                              | -2529.303911                                    |                     |
| <b>P<sub>a</sub></b>     | -2235.477624                                              | -2235.173989                                    |                     |
| <b>TS3-4</b>             | -2529.608438                                              | -2529.189294                                    | -93.30              |
| <b>IM4</b>               | -2529.660672                                              | -2529.261844                                    |                     |
| <b>TS5-6</b>             | -2529.616132                                              | -2529.190423                                    | -154.46             |
| <b>IM6</b>               | -2529.654386                                              | -2529.241438                                    |                     |
| <b>1t</b>                | -990.617382                                               | -990.5144337                                    |                     |
| <b>IM1'</b>              | -1166.662364                                              | -1166.444464                                    |                     |
| <b>TS1'-2'</b>           | -1566.222783                                              | -1565.944362                                    | -212.32             |

|                      |              |              |         |
|----------------------|--------------|--------------|---------|
| <b>IM2'</b>          | -1566.229893 | -1565.9719   |         |
| <b>TS2'-3'</b>       | -1566.223907 | -1565.956887 | -387.20 |
| <b>IM3'</b>          | -1566.263118 | -1566.007985 |         |
| <b>TS3'-7'</b>       | -1797.210063 | -1796.907904 | -38.53  |
| <b>TS3'-9'</b>       | -1566.238192 | -1565.975048 | -175.46 |
| <b>IM9'</b>          | -1566.271356 | -1566.024312 |         |
| <b>TS3'-5'</b>       | -1566.227624 | -1565.969775 | -108.31 |
| <b>IM5'</b>          | -1566.244549 | -1566.004573 |         |
| <b>TS5'-6'</b>       | -1566.236585 | -1565.980844 | -174.96 |
| <b>IM6'</b>          | -1566.24554  | -1566.008491 |         |
| <b>TS6'-7'</b>       | -1566.231474 | -1565.98363  | -119.39 |
| <b>IM7'</b>          | -1566.254634 | -1566.035348 |         |
| <b>TS3'-4'</b>       | -1566.242459 | -1565.98537  | -71.20  |
| <b>IM4'</b>          | -1566.280682 | -1566.052193 |         |
| <b>TS4'-10'</b>      | -1566.266021 | -1566.018412 | -637.26 |
| <b>IM10'</b>         | -1566.347183 | -1566.111578 |         |
| <b>P<sub>t</sub></b> | -1390.335314 | -1390.181329 |         |
| <b>1b</b>            | -1219.39921  | -1219.263008 |         |
| <b>IM13</b>          | -1437.274439 | -1436.981352 |         |
| <b>TS13-14</b>       | -2527.412877 | -2526.974482 | -207.26 |
| <b>IM14</b>          | -2527.425646 | -2527.009653 |         |
| <b>TS14-15</b>       | -2527.414278 | -2526.990151 | -40.7   |
| <b>IM15</b>          | -2527.427894 | -2527.012666 |         |
| <b>TS15-18</b>       | -2527.412833 | -2526.999216 | -58.45  |
| <b>TS15-20</b>       | -2527.413772 | -2527.003157 | -96.74  |
| <b>IM20</b>          | -2527.466251 | -2527.079443 |         |
| <b>TS16-17</b>       | -2527.42282  | -2527.0132   | -53.62  |
| <b>IM17</b>          | -2527.443684 | -2527.048994 |         |
| <b>TS16-19</b>       | -2527.418024 | -2527.015511 | -152.19 |
| <b>IM19</b>          | -2527.45985  | -2527.060168 |         |
| <b>TS15-16</b>       | -2527.416629 | -2527.010648 | -71.94  |
| <b>IM16</b>          | -2527.457325 | -2527.047606 |         |
| <b>TS17-18</b>       | -2527.426632 | -2527.013493 | -161.08 |
| <b>IM18</b>          | -2527.454703 | -2527.066251 |         |
| <b>TS18-21</b>       | -2527.420273 | -2527.027913 | -291.90 |
| <b>IM21</b>          | -2527.443274 | -2527.066253 |         |
| <b>TS18-24</b>       | -2527.446451 | -2527.06333  | -202.80 |
| <b>IM24</b>          | -2527.471953 | -2527.070842 |         |
| <b>TS24-25</b>       | -2527.45318  | -2527.041537 | -756.74 |
| <b>IM25</b>          | -2527.501174 | -2527.081245 |         |
| <b>TS25-26</b>       | -2527.474121 | -2527.061571 | -163.42 |
| <b>IM26</b>          | -2527.513722 | -2527.1009   |         |
| <b>P<sub>b</sub></b> | -2309.643293 | -2309.369422 |         |

|                |              |              |         |
|----------------|--------------|--------------|---------|
| <b>7a</b>      | -2233.286097 | -2232.972821 |         |
| <b>TS20-22</b> | -2527.444466 | -2527.038002 | -815.18 |
| <b>IM22</b>    | -2527.517136 | -2527.117441 |         |
| <b>TS22-23</b> | -2527.518949 | -2527.115875 | -815.07 |
| <b>IM23</b>    | -2527.537246 | -2527.140131 |         |
| <b>8a</b>      | -2309.678006 | -2309.41106  |         |

Cartesian coordinates for the stationary points given in Fig. 1

**KAuBr<sub>4</sub>**

|    |             |             |             |
|----|-------------|-------------|-------------|
| Au | 0.24761100  | -0.00006200 | -0.19067700 |
| Br | 1.92464000  | 1.77375600  | 0.42735100  |
| Br | 1.92413000  | -1.77457100 | 0.42670900  |
| Br | -1.46897200 | -1.85097900 | -0.75046000 |
| Br | -1.46845200 | 1.85155200  | -0.74979700 |
| K  | -3.39639600 | 0.00030500  | 1.08020800  |

**2M**

|    |             |             |             |
|----|-------------|-------------|-------------|
| C  | 1.25384100  | 1.74656700  | 0.08915700  |
| C  | 0.58283600  | 0.47508800  | 0.04424500  |
| C  | 1.33431800  | -0.73063500 | -0.04460600 |
| C  | 2.69582400  | -0.61173400 | -0.05382600 |
| C  | 3.38028000  | 0.64382600  | 0.01418100  |
| C  | 2.68005600  | 1.81715600  | 0.08043500  |
| C  | -0.76510400 | 0.81740600  | 0.06639200  |
| H  | 0.86100600  | -1.70176100 | -0.11996500 |
| H  | 4.46470800  | 0.64395400  | 0.00420300  |
| H  | 3.17985800  | 2.77887800  | 0.12211000  |
| O  | -0.85187200 | 2.16321200  | 0.11206400  |
| N  | 0.40215200  | 2.76516400  | 0.12790900  |
| Cl | 3.70914400  | -2.09312100 | -0.16904000 |
| C  | -3.20661300 | 0.69949900  | -0.37887700 |
| C  | -4.40123300 | -0.01376900 | -0.41661100 |
| C  | -4.43170300 | -1.36076800 | -0.04518200 |
| C  | -3.25754500 | -1.98981600 | 0.37494200  |
| C  | -2.05899400 | -1.28155700 | 0.41946500  |
| C  | -2.01683000 | 0.07080500  | 0.03471900  |
| H  | -3.18180800 | 1.74296900  | -0.67456800 |
| H  | -5.31152500 | 0.48245900  | -0.74121300 |
| H  | -5.36543600 | -1.91502200 | -0.07828000 |
| H  | -3.27563600 | -3.03264200 | 0.67886800  |
| H  | -1.16149800 | -1.77003600 | 0.78405100  |

**1a**

|   |             |             |             |
|---|-------------|-------------|-------------|
| C | -0.65300900 | 0.11601600  | 1.67325400  |
| C | -0.49601200 | -0.31736200 | 2.79544500  |
| H | -0.42907000 | -0.63667600 | 3.80923400  |
| N | -0.82290300 | 0.59590700  | 0.43303500  |
| C | -3.33527000 | -1.79869600 | -0.08197200 |
| C | -2.83602700 | -0.53550100 | -0.41234200 |
| C | -3.72920000 | 0.53283300  | -0.57186500 |
| C | -5.09887500 | 0.33581400  | -0.40898600 |



|   |             |             |             |
|---|-------------|-------------|-------------|
| C | -5.59247800 | -0.93203800 | -0.08530200 |
| C | -4.70889600 | -1.99886800 | 0.07791700  |
| H | -2.64696300 | -2.63023500 | 0.05062800  |
| H | -3.34169900 | 1.51839600  | -0.81628600 |
| H | -5.78325900 | 1.17030400  | -0.53616700 |
| H | -6.66112100 | -1.08481300 | 0.04008500  |
| H | -5.08502700 | -2.98608700 | 0.33287200  |
| C | -1.35031100 | -0.31944200 | -0.60691000 |
| H | -0.81637200 | -1.27897200 | -0.59261600 |
| H | -1.16022400 | 0.17786800  | -1.56263100 |
| C | 3.55023900  | -0.98760300 | -1.36707200 |
| C | 2.44831300  | -0.13359000 | -1.36978000 |
| C | 2.12883900  | 0.52634300  | -0.18920300 |
| C | 2.85792200  | 0.36724600  | 0.98359700  |
| C | 3.95389400  | -0.49407900 | 0.96127500  |
| C | 4.31264700  | -1.18537300 | -0.20576000 |
| H | 3.82683400  | -1.50144100 | -2.28412300 |
| H | 1.86630200  | 0.04123200  | -2.26846300 |
| H | 2.58496800  | 0.91732800  | 1.87692700  |
| H | 4.54349000  | -0.62590700 | 1.86482500  |
| C | 5.48580700  | -2.13633800 | -0.20713800 |
| H | 5.94326100  | -2.20758600 | -1.19910300 |
| H | 6.25723200  | -1.82201900 | 0.50314700  |
| H | 5.16973900  | -3.14781500 | 0.08064800  |
| S | 0.66057900  | 1.63863700  | -0.16752200 |
| O | 0.86536900  | 2.69065100  | 0.92179000  |
| O | 0.29681500  | 1.99318900  | -1.61689500 |

**IMI**

|   |             |             |             |
|---|-------------|-------------|-------------|
| C | -1.17586500 | 0.97733900  | 0.27220100  |
| C | -0.91201500 | -0.01388800 | 1.06593300  |
| H | -1.44264300 | -0.18111000 | 1.99774700  |
| N | -1.45048400 | 1.83051400  | -0.58879800 |
| C | -1.92972400 | 4.71243400  | 0.87270700  |
| C | -0.79977900 | 4.00049000  | 0.44654700  |
| C | 0.37975400  | 4.05712300  | 1.20063700  |
| C | 0.42442000  | 4.81954100  | 2.36986900  |
| C | -0.70509100 | 5.52231000  | 2.79287900  |
| C | -1.88348200 | 5.46906400  | 2.04251600  |
| H | -2.84203800 | 4.67940100  | 0.28096400  |
| H | 1.26186500  | 3.51469400  | 0.87102000  |
| H | 1.34523700  | 4.86546200  | 2.94396900  |
| H | -0.66713000 | 6.11630400  | 3.70195500  |
| H | -2.76087000 | 6.02349900  | 2.36404000  |

|    |             |             |             |
|----|-------------|-------------|-------------|
| C  | -0.85111200 | 3.18193300  | -0.81917600 |
| H  | -1.48001900 | 3.64855300  | -1.58245000 |
| H  | 0.14576300  | 3.00976600  | -1.23512200 |
| C  | -6.18932700 | 0.37394300  | -0.32521300 |
| C  | -5.17304900 | 1.04101400  | -1.00323000 |
| C  | -4.03342700 | 0.31108300  | -1.32908100 |
| C  | -3.85002700 | -1.02666800 | -0.99300300 |
| C  | -4.88307500 | -1.66197400 | -0.30652400 |
| C  | -6.06172600 | -0.97970700 | 0.03210400  |
| H  | -7.09721500 | 0.91331200  | -0.06960900 |
| H  | -5.26500100 | 2.08382300  | -1.28681800 |
| H  | -2.94052800 | -1.56021100 | -1.24629100 |
| H  | -4.75483700 | -2.70246800 | -0.02292600 |
| C  | -7.17933600 | -1.69418600 | 0.75038900  |
| H  | -7.82506400 | -0.99348300 | 1.28819400  |
| H  | -7.80879100 | -2.24185800 | 0.03673900  |
| H  | -6.78987800 | -2.42462100 | 1.46652800  |
| S  | -2.68305700 | 1.17567600  | -2.20443600 |
| O  | -1.80620600 | 0.19147100  | -2.97593600 |
| O  | -3.15795500 | 2.50848700  | -2.79222900 |
| Au | 0.52128700  | -1.38997600 | 0.54381000  |
| Br | -1.28100200 | -3.22551000 | 0.98246000  |
| Br | 2.33279000  | -3.11183700 | -0.09100400 |
| Br | 2.17438600  | 0.57143900  | 0.10415300  |
| Br | 4.72255300  | 2.22242500  | -0.76430400 |
| K  | 4.80351700  | -0.98337700 | -0.91810800 |

**TS1-2**

|   |             |             |             |
|---|-------------|-------------|-------------|
| C | -1.14319800 | 0.52311500  | -0.18574500 |
| C | -1.20803900 | -0.77481300 | 0.03854800  |
| H | -2.14857600 | -1.31029000 | 0.05490100  |
| N | -0.36636600 | 1.53266400  | -0.39617200 |
| C | 2.01003300  | 2.95220800  | 0.96975000  |
| C | 0.84965900  | 3.55354400  | 0.46366300  |
| C | 0.89371000  | 4.89422700  | 0.06231000  |
| C | 2.08048900  | 5.62338000  | 0.16990400  |
| C | 3.23422600  | 5.01221500  | 0.66576700  |
| C | 3.20213100  | 3.67181300  | 1.06301100  |
| H | 1.98296100  | 1.91058800  | 1.27844100  |
| H | 0.00300700  | 5.36253200  | -0.34822200 |
| H | 2.10307000  | 6.66403500  | -0.14292000 |
| H | 4.16143600  | 5.57404500  | 0.73944000  |
| H | 4.10477800  | 3.17978600  | 1.41727100  |
| C | -0.45168100 | 2.78683900  | 0.38588800  |

|    |             |             |             |
|----|-------------|-------------|-------------|
| H  | -0.77811800 | 2.47319000  | 1.38444700  |
| H  | -1.24307900 | 3.40803700  | -0.04921000 |
| C  | 3.52858100  | -0.02633400 | -2.91956000 |
| C  | 2.16004200  | 0.22415600  | -2.83021400 |
| C  | 1.76540700  | 1.53806700  | -2.59753200 |
| C  | 2.65533300  | 2.59709300  | -2.44650800 |
| C  | 4.01313800  | 2.31149500  | -2.54294700 |
| C  | 4.47345600  | 1.00147700  | -2.76440000 |
| H  | 3.86461900  | -1.04292300 | -3.10390400 |
| H  | 1.43102400  | -0.57177500 | -2.94130800 |
| H  | 2.30206000  | 3.60269200  | -2.24839700 |
| H  | 4.73198400  | 3.11548400  | -2.41759600 |
| C  | 5.94991900  | 0.71143700  | -2.77944200 |
| H  | 6.49963400  | 1.46779100  | -3.35054600 |
| H  | 6.33486300  | 0.73292200  | -1.74951900 |
| H  | 6.16429900  | -0.27216300 | -3.20854900 |
| S  | -0.01835500 | 1.86539200  | -2.39045500 |
| O  | -0.37020900 | 3.34344600  | -2.59056900 |
| O  | -0.83913500 | 0.75030600  | -3.05428600 |
| Au | 0.43365100  | -1.95412600 | 0.35533500  |
| Br | -0.19345700 | -3.06677600 | -1.83043700 |
| Br | 2.43518600  | -3.54219100 | 0.67504500  |
| Br | 0.87709000  | -0.76483900 | 2.57683200  |
| Br | 6.20649700  | 1.11620400  | 1.20440200  |
| K  | 4.30727400  | -1.17047900 | 2.06763600  |
| C  | -4.01571800 | 0.63676200  | -1.06752000 |
| C  | -5.23087800 | 0.52821100  | -0.31983000 |
| C  | -6.43775000 | 0.14637200  | -0.96553000 |
| C  | -6.35684300 | -0.14839800 | -2.30030400 |
| C  | -5.13897500 | -0.07692800 | -3.04232500 |
| C  | -3.96502200 | 0.31831200  | -2.45089900 |
| C  | -4.87624900 | 0.90222300  | 0.98095400  |
| H  | -7.38364900 | 0.10536000  | -0.44091300 |
| H  | -5.15845100 | -0.33395400 | -4.09573400 |
| H  | -3.03064700 | 0.39387400  | -2.99656800 |
| O  | -3.56885400 | 1.21372900  | 0.99092400  |
| N  | -3.02053800 | 1.08595600  | -0.28420900 |
| Cl | -7.83500200 | -0.63596300 | -3.18149800 |
| C  | -5.09330400 | 1.86902000  | 3.25599500  |
| C  | -5.78395100 | 1.99578400  | 4.45662600  |
| C  | -6.97695200 | 1.29585600  | 4.65973100  |
| C  | -7.47609500 | 0.45972300  | 3.65770400  |
| C  | -6.79271900 | 0.32690900  | 2.45249200  |
| C  | -5.59606300 | 1.03630000  | 2.23716500  |

|   |             |             |            |
|---|-------------|-------------|------------|
| H | -4.17230700 | 2.41888800  | 3.09482200 |
| H | -5.39235500 | 2.64356800  | 5.23505300 |
| H | -7.51310600 | 1.39761300  | 5.59872200 |
| H | -8.39380800 | -0.09781100 | 3.81863400 |
| H | -7.16575800 | -0.35578300 | 1.69695200 |

## IM2

|    |             |             |             |
|----|-------------|-------------|-------------|
| C  | 1.46176100  | -0.08538000 | 0.03384600  |
| C  | 1.12115000  | -1.29504000 | -0.44425900 |
| H  | 1.91112800  | -1.99079500 | -0.71716600 |
| N  | 0.59581500  | 0.92692600  | 0.44713100  |
| C  | -1.40573600 | 3.09247500  | -0.43833200 |
| C  | -0.16106400 | 3.31003000  | 0.16759700  |
| C  | 0.05721500  | 4.50267300  | 0.86767500  |
| C  | -0.95368500 | 5.46279900  | 0.95949700  |
| C  | -2.19489900 | 5.23016100  | 0.36363000  |
| C  | -2.42482700 | 4.04014300  | -0.33408900 |
| H  | -1.57488600 | 2.16668500  | -0.98113600 |
| H  | 1.01367100  | 4.67131400  | 1.35574000  |
| H  | -0.77246100 | 6.38523100  | 1.50536900  |
| H  | -2.98786600 | 5.96867600  | 0.44450200  |
| H  | -3.40135100 | 3.84052500  | -0.76925500 |
| C  | 0.95903600  | 2.30147700  | 0.02561300  |
| H  | 1.22178200  | 2.20009100  | -1.03509600 |
| H  | 1.84808300  | 2.66040300  | 0.56177100  |
| C  | -3.53883900 | -0.16538800 | 2.76847300  |
| C  | -2.15435700 | -0.23699100 | 2.61219000  |
| C  | -1.43808600 | 0.95327000  | 2.67662900  |
| C  | -2.02944000 | 2.19128300  | 2.89772200  |
| C  | -3.41233800 | 2.22909400  | 3.05201800  |
| C  | -4.19009900 | 1.06174500  | 2.97465000  |
| H  | -4.12011200 | -1.08266500 | 2.72623300  |
| H  | -1.65225900 | -1.18627600 | 2.45576100  |
| H  | -1.43223600 | 3.09504400  | 2.93319500  |
| H  | -3.90009500 | 3.18602600  | 3.21252400  |
| C  | -5.69143500 | 1.14234100  | 3.06398100  |
| H  | -6.09886400 | 1.49062200  | 2.10391400  |
| H  | -6.13482100 | 0.16769900  | 3.29139500  |
| H  | -6.00785100 | 1.85503500  | 3.83350300  |
| S  | 0.37016400  | 0.88041200  | 2.40857200  |
| O  | 1.07647000  | 2.12916200  | 2.97084100  |
| O  | 0.87433700  | -0.52550600 | 2.80230900  |
| Au | -0.74648600 | -2.03273000 | -0.71236500 |
| Br | -0.15317000 | -3.68558900 | 1.10992900  |

|    |             |             |             |
|----|-------------|-------------|-------------|
| Br | -3.09719500 | -3.05825900 | -0.99381500 |
| Br | -1.07235900 | -0.42726400 | -2.67984900 |
| Br | -5.97549100 | 2.35717700  | -0.81082100 |
| K  | -4.43352900 | -0.13454800 | -1.80501300 |
| C  | 3.91561000  | -0.13327200 | 0.91395500  |
| C  | 5.14569600  | 0.24255200  | 0.29596300  |
| C  | 6.37122800  | 0.08096000  | 0.99471400  |
| C  | 6.30268800  | -0.48115600 | 2.24266400  |
| C  | 5.07262500  | -0.87985500 | 2.84341600  |
| C  | 3.86706400  | -0.71111500 | 2.20327800  |
| C  | 4.79283600  | 0.75719000  | -0.96037700 |
| H  | 7.31621800  | 0.40123800  | 0.57622200  |
| H  | 5.09727900  | -1.31299600 | 3.83746300  |
| H  | 2.91255700  | -0.96081200 | 2.65674000  |
| O  | 3.45821100  | 0.70603400  | -1.09235600 |
| N  | 2.90177900  | 0.16893100  | 0.07514500  |
| Cl | 7.80111900  | -0.71713200 | 3.18106700  |
| C  | 4.89299500  | 2.17116900  | -2.99372700 |
| C  | 5.60535200  | 2.69816900  | -4.06491900 |
| C  | 6.95395100  | 2.37274900  | -4.24065300 |
| C  | 7.59154300  | 1.51098200  | -3.34361100 |
| C  | 6.88970800  | 0.98003500  | -2.26641500 |
| C  | 5.53344500  | 1.31133200  | -2.07814600 |
| H  | 3.84922500  | 2.43084600  | -2.85259500 |
| H  | 5.10905800  | 3.36507200  | -4.76292500 |
| H  | 7.50598600  | 2.78597600  | -5.07957200 |
| H  | 8.63368700  | 1.24439000  | -3.48957300 |
| H  | 7.37960300  | 0.27802800  | -1.60096400 |

**TS2-3**

|   |             |             |             |
|---|-------------|-------------|-------------|
| C | 1.40714700  | 0.28942100  | 0.27706800  |
| C | 1.24327200  | -0.91269400 | -0.37555000 |
| H | 2.14042300  | -1.46413300 | -0.65176000 |
| N | 0.31558700  | 1.14022400  | 0.58339400  |
| C | -1.96288600 | 2.98475100  | -0.41347200 |
| C | -0.75857300 | 3.38187300  | 0.18273000  |
| C | -0.70432400 | 4.61282200  | 0.84782700  |
| C | -1.83401500 | 5.43212000  | 0.91393400  |
| C | -3.03189900 | 5.02060900  | 0.32636400  |
| C | -3.09897400 | 3.79134700  | -0.33676300 |
| H | -2.00538000 | 2.02924600  | -0.92887900 |
| H | 0.21942400  | 4.91913100  | 1.33104700  |
| H | -1.77849900 | 6.38525700  | 1.43363000  |
| H | -3.91598000 | 5.64950100  | 0.38688900  |

|    |             |             |             |
|----|-------------|-------------|-------------|
| H  | -4.03813800 | 3.45335800  | -0.76810900 |
| C  | 0.48692300  | 2.52837100  | 0.07625000  |
| H  | 0.75983400  | 2.39776200  | -0.97867400 |
| H  | 1.32702100  | 3.02561500  | 0.57640400  |
| C  | -3.53466300 | -0.54051200 | 2.88696100  |
| C  | -2.15500500 | -0.37310600 | 2.76483700  |
| C  | -1.65805100 | 0.92484200  | 2.78432700  |
| C  | -2.46318800 | 2.04740800  | 2.93463600  |
| C  | -3.83581400 | 1.84863400  | 3.05695700  |
| C  | -4.39581400 | 0.56091000  | 3.01751300  |
| H  | -3.94622300 | -1.54620900 | 2.87486300  |
| H  | -1.48984600 | -1.22429600 | 2.66443300  |
| H  | -2.03395500 | 3.04274200  | 2.93819000  |
| H  | -4.48767400 | 2.71117600  | 3.16035600  |
| C  | -5.89096200 | 0.38177700  | 3.06850500  |
| H  | -6.32989900 | 0.65429400  | 2.09841400  |
| H  | -6.16574100 | -0.65431100 | 3.28982400  |
| H  | -6.34451600 | 1.02934400  | 3.82715200  |
| S  | 0.14041600  | 1.16292100  | 2.52992000  |
| O  | 0.59205900  | 2.53890300  | 3.04598800  |
| O  | 0.89016700  | -0.11510600 | 2.96734700  |
| Au | -0.47640000 | -1.84614400 | -0.83167000 |
| Br | 0.22214000  | -3.41409800 | 1.03549500  |
| Br | -2.61722300 | -3.16928100 | -1.32056200 |
| Br | -0.83733300 | -0.23135500 | -2.77562000 |
| Br | -6.37520200 | 1.56820500  | -0.85431600 |
| K  | -4.33914300 | -0.42916100 | -2.05076400 |
| C  | 3.73090100  | -0.12335100 | 0.95131200  |
| C  | 4.96074400  | 0.22625100  | 0.34229400  |
| C  | 6.15917600  | -0.38825500 | 0.74982100  |
| C  | 6.08684600  | -1.37759700 | 1.71107600  |
| C  | 4.86386000  | -1.76119300 | 2.28962300  |
| C  | 3.67899800  | -1.13963500 | 1.92497500  |
| C  | 4.73870000  | 1.28608000  | -0.61809600 |
| H  | 7.11342100  | -0.09869300 | 0.32988600  |
| H  | 4.85131800  | -2.54260100 | 3.04190700  |
| H  | 2.73562900  | -1.36947100 | 2.40664000  |
| O  | 3.52725800  | 1.63978800  | -0.72683300 |
| N  | 2.66090800  | 0.68716100  | 0.64773700  |
| Cl | 7.58529000  | -2.19629000 | 2.23653600  |
| C  | 5.55526000  | 3.37359000  | -1.66871200 |
| C  | 6.49008300  | 4.07785600  | -2.42026600 |
| C  | 7.60874600  | 3.42074400  | -2.94182800 |
| C  | 7.79201900  | 2.05454000  | -2.71318000 |

|   |            |            |             |
|---|------------|------------|-------------|
| C | 6.87259100 | 1.34461800 | -1.94447600 |
| C | 5.75264100 | 2.00497900 | -1.40799100 |
| H | 4.68004400 | 3.87149800 | -1.26513400 |
| H | 6.34457100 | 5.13782800 | -2.60461900 |
| H | 8.33294300 | 3.97180600 | -3.53468700 |
| H | 8.64776800 | 1.53947100 | -3.13877600 |
| H | 6.99905700 | 0.27623100 | -1.80724800 |

### IM3

|   |             |             |             |
|---|-------------|-------------|-------------|
| C | 1.31503100  | 0.56215900  | 0.17313100  |
| C | 1.55645900  | -0.83010500 | 0.05593200  |
| H | 2.60265700  | -1.12153300 | 0.02291600  |
| N | 0.00717200  | 1.06496500  | 0.00148500  |
| C | -2.13394200 | 2.03754900  | -1.78456400 |
| C | -1.39566600 | 2.90300800  | -0.96764900 |
| C | -1.85647600 | 4.21009300  | -0.76628200 |
| C | -3.03884400 | 4.64530400  | -1.36564700 |
| C | -3.78017000 | 3.77265900  | -2.16470100 |
| C | -3.32527200 | 2.46824800  | -2.37099300 |
| H | -1.77345900 | 1.02758800  | -1.95454800 |
| H | -1.29124800 | 4.88853800  | -0.13074000 |
| H | -3.38641200 | 5.66135100  | -1.19824900 |
| H | -4.71079500 | 4.10142200  | -2.61807400 |
| H | -3.90551000 | 1.78281300  | -2.98135900 |
| C | -0.06644100 | 2.49198800  | -0.37134000 |
| H | 0.72424100  | 2.61972100  | -1.12016500 |
| H | 0.21378400  | 3.15560100  | 0.45977200  |
| C | -4.23978100 | 3.04032700  | 2.07193000  |
| C | -3.39866200 | 2.01152100  | 1.65708600  |
| C | -2.08892000 | 2.03054800  | 2.12047400  |
| C | -1.58056100 | 3.01640800  | 2.96038000  |
| C | -2.44595700 | 4.03684500  | 3.35041500  |
| C | -3.78098500 | 4.06414400  | 2.91576100  |
| H | -5.26872100 | 3.03035100  | 1.72297300  |
| H | -3.78659300 | 1.23806100  | 1.00150400  |
| H | -0.55802200 | 2.97004000  | 3.31847900  |
| H | -2.07965200 | 4.81695900  | 4.01230500  |
| C | -4.71777300 | 5.15926900  | 3.36282200  |
| H | -5.31224900 | 5.53817800  | 2.52451500  |
| H | -5.42441700 | 4.78285700  | 4.11347200  |
| H | -4.17526400 | 5.99877200  | 3.80787800  |
| S | -0.95798100 | 0.65270600  | 1.66957000  |
| O | 0.14456100  | 0.55431300  | 2.74059000  |
| O | -1.79560600 | -0.58851400 | 1.29647000  |

|    |             |             |             |
|----|-------------|-------------|-------------|
| Au | 0.29510400  | -2.36491400 | -0.19842300 |
| Br | 1.30434600  | -3.02482300 | 2.04655200  |
| Br | -1.21830300 | -4.42071600 | -0.31814400 |
| Br | -0.37068000 | -1.59997300 | -2.52984500 |
| Br | -5.95864600 | 0.03427100  | -0.28842800 |
| K  | -3.50997400 | -1.96493100 | -0.29016300 |
| C  | 3.57468600  | 1.13431700  | 0.66909200  |
| C  | 4.68691000  | 1.86997500  | 0.14634400  |
| C  | 5.94835000  | 1.68492600  | 0.69287300  |
| C  | 6.12631500  | 0.77541900  | 1.74160500  |
| C  | 5.05633000  | 0.06819700  | 2.29568200  |
| C  | 3.78802500  | 0.24974800  | 1.76831400  |
| C  | 4.53065200  | 2.90742800  | -0.94767800 |
| H  | 6.78991300  | 2.25027600  | 0.30875500  |
| H  | 5.21373800  | -0.58724900 | 3.14501400  |
| H  | 2.92902100  | -0.20422300 | 2.25220300  |
| O  | 4.99543100  | 4.01877300  | -0.73852400 |
| N  | 2.33200800  | 1.42433200  | 0.20444400  |
| Cl | 7.75447600  | 0.55244200  | 2.41528800  |
| C  | 3.42114100  | 3.59982600  | -3.05761000 |
| C  | 2.81667500  | 3.31660100  | -4.27830500 |
| C  | 2.67048900  | 1.98886600  | -4.69643800 |
| C  | 3.13109600  | 0.94371700  | -3.89137900 |
| C  | 3.71844500  | 1.22473900  | -2.65874500 |
| C  | 3.86286600  | 2.55412900  | -2.22879700 |
| H  | 3.55928100  | 4.62258200  | -2.72224100 |
| H  | 2.46215200  | 4.12692400  | -4.90868400 |
| H  | 2.20155800  | 1.76919200  | -5.65139700 |
| H  | 3.02852500  | -0.08571100 | -4.22101500 |
| H  | 4.08679300  | 0.40924600  | -2.04262000 |

**TS3-9**

|   |            |             |             |
|---|------------|-------------|-------------|
| C | 1.62823600 | 0.52489800  | 0.04316700  |
| C | 0.84902700 | -0.69499600 | -0.11050600 |
| H | 1.42696400 | -1.60682200 | -0.19719100 |
| N | 2.96720700 | 0.27998300  | 0.47546200  |
| C | 0.85213600 | -1.17699700 | 2.22789500  |
| C | 2.27488100 | -1.24093300 | 2.18479600  |
| C | 2.89855400 | -2.48602600 | 2.19981000  |
| C | 2.13772500 | -3.65857700 | 2.29337900  |
| C | 0.73819600 | -3.60630900 | 2.35748800  |
| C | 0.09996500 | -2.37276800 | 2.33921300  |
| H | 0.35922000 | -0.22137800 | 2.38694400  |
| H | 3.98158200 | -2.54553500 | 2.13276600  |



|    |             |             |             |
|----|-------------|-------------|-------------|
| H  | 2.64207600  | -4.62096300 | 2.31496200  |
| H  | 0.13385500  | -4.50591900 | 2.43309400  |
| H  | -0.98100600 | -2.33953000 | 2.41811500  |
| C  | 3.06408600  | 0.02045500  | 1.93896900  |
| H  | 2.68295800  | 0.87477700  | 2.51094200  |
| H  | 4.11888300  | -0.13098100 | 2.18243200  |
| C  | 7.13705800  | -0.94377900 | -1.13249700 |
| C  | 5.94310500  | -0.22738500 | -1.13191700 |
| C  | 5.71325400  | 0.65746900  | -0.08434700 |
| C  | 6.62359800  | 0.86257400  | 0.94272300  |
| C  | 7.81392900  | 0.13270000  | 0.92016600  |
| C  | 8.08764300  | -0.77622600 | -0.11073700 |
| H  | 7.33726500  | -1.64098700 | -1.94206500 |
| H  | 5.21384100  | -0.34170500 | -1.92703900 |
| H  | 6.40886000  | 1.58354900  | 1.72467600  |
| H  | 8.54156900  | 0.27909300  | 1.71393100  |
| C  | 9.38693700  | -1.54489700 | -0.14373400 |
| H  | 9.22033200  | -2.60052400 | -0.38537600 |
| H  | 10.06074400 | -1.14075900 | -0.91003600 |
| H  | 9.90904900  | -1.49323100 | 0.81626100  |
| S  | 4.14844000  | 1.63216900  | -0.08094900 |
| O  | 4.27162800  | 2.71778100  | 0.99728200  |
| O  | 3.75875900  | 1.94026600  | -1.53263500 |
| Au | -0.99858000 | -0.83140300 | -0.96780200 |
| Br | -2.38586700 | -0.06158000 | 1.03459100  |
| Br | -3.15426500 | -1.15759400 | -2.33364500 |
| Br | 0.42750400  | -1.67255500 | -2.90293600 |
| Br | -2.79684800 | -4.80760500 | 2.28890000  |
| K  | -4.24715700 | -2.93805900 | 0.30006200  |
| C  | 0.15353700  | 2.26379300  | -0.74158500 |
| C  | -0.76099500 | 3.12621500  | -0.07388200 |
| C  | -1.69460700 | 3.84369000  | -0.83247500 |
| C  | -1.74778700 | 3.68039800  | -2.21078100 |
| C  | -0.88492000 | 2.81138800  | -2.87208400 |
| C  | 0.06671800  | 2.10805700  | -2.13856700 |
| C  | -0.66281300 | 3.22112300  | 1.40756500  |
| H  | -2.37759000 | 4.52935100  | -0.34858900 |
| H  | -0.94221500 | 2.69080900  | -3.94821200 |
| H  | 0.79507900  | 1.48544000  | -2.64508000 |
| O  | 0.22980500  | 2.61087400  | 1.99642200  |
| N  | 1.24031600  | 1.74861900  | -0.06580800 |
| Cl | -2.95963000 | 4.60524900  | -3.15210300 |
| C  | -1.06774100 | 4.87519700  | 3.21891200  |
| C  | -1.90528400 | 5.63885800  | 4.02826200  |

|   |             |            |            |
|---|-------------|------------|------------|
| C | -3.29127800 | 5.57751900 | 3.85741700 |
| C | -3.83668700 | 4.75003400 | 2.87419000 |
| C | -3.00063300 | 4.00173700 | 2.04375300 |
| C | -1.60769400 | 4.06785000 | 2.20586400 |
| H | 0.00857700  | 4.89674300 | 3.35818800 |
| H | -1.47849400 | 6.27526000 | 4.79832600 |
| H | -3.94444500 | 6.16655000 | 4.49531300 |
| H | -4.91415000 | 4.68253700 | 2.75331500 |
| H | -3.43192800 | 3.33900400 | 1.29968400 |

**TS3-5**

|   |             |             |             |
|---|-------------|-------------|-------------|
| C | -1.36287400 | 0.35912900  | -0.30091900 |
| C | -1.53561700 | -1.06633200 | -0.31434500 |
| H | -2.55820700 | -1.42938300 | -0.35796900 |
| N | -0.08553400 | 0.86026400  | 0.05045600  |
| C | 1.95285400  | 1.49914300  | 2.07407600  |
| C | 1.19230300  | 2.49402200  | 1.44571400  |
| C | 1.60416200  | 3.82891200  | 1.54220800  |
| C | 2.76018400  | 4.16563200  | 2.24709900  |
| C | 3.52434100  | 3.16793600  | 2.85561800  |
| C | 3.11774000  | 1.83494000  | 2.76645700  |
| H | 1.62939800  | 0.46453000  | 2.01937500  |
| H | 1.02378300  | 4.60809300  | 1.05279900  |
| H | 3.07037800  | 5.20534000  | 2.30971300  |
| H | 4.43470900  | 3.42441200  | 3.38962800  |
| H | 3.71246400  | 1.05411400  | 3.23138300  |
| C | -0.10439200 | 2.17133000  | 0.73382400  |
| H | -0.91830500 | 2.08769000  | 1.46460200  |
| H | -0.39977300 | 2.99017300  | 0.06338400  |
| C | 4.00387400  | 3.62892300  | -1.48791500 |
| C | 3.26504200  | 2.46233400  | -1.31138100 |
| C | 1.94969600  | 2.46634200  | -1.75713300 |
| C | 1.33685700  | 3.56507500  | -2.35154000 |
| C | 2.09984200  | 4.72188700  | -2.50104300 |
| C | 3.43706100  | 4.77125700  | -2.07501300 |
| H | 5.04017700  | 3.62936100  | -1.16103100 |
| H | 3.73817600  | 1.59743100  | -0.85501200 |
| H | 0.31559800  | 3.50712200  | -2.71178400 |
| H | 1.65162600  | 5.59404700  | -2.96929100 |
| C | 4.26319500  | 6.02069700  | -2.25783300 |
| H | 4.73067200  | 6.32587600  | -1.31467600 |
| H | 5.07473200  | 5.84897900  | -2.97571000 |
| H | 3.65910500  | 6.85513000  | -2.62612100 |
| S | 0.95769000  | 0.92039500  | -1.63636400 |

|    |             |             |             |
|----|-------------|-------------|-------------|
| O  | -0.11155700 | 0.94380900  | -2.74610200 |
| O  | 1.91408100  | -0.28227400 | -1.49858400 |
| Au | -0.13619500 | -2.41881900 | 0.20522000  |
| Br | -0.80221500 | -2.51765300 | -2.28874500 |
| Br | 1.67284800  | -4.21357000 | 0.37057700  |
| Br | -0.22396800 | -1.94563900 | 2.67067700  |
| Br | 6.10866300  | 0.30073000  | -0.26737600 |
| K  | 3.87834200  | -1.87111100 | -0.66233300 |
| C  | -3.63066600 | 0.91544900  | -0.85457700 |
| C  | -4.74627900 | 1.61929500  | -0.31051400 |
| C  | -6.00287800 | 1.46919300  | -0.88655700 |
| C  | -6.16515900 | 0.62899600  | -1.98951800 |
| C  | -5.08521400 | -0.04063500 | -2.56743600 |
| C  | -3.82598800 | 0.10442500  | -2.00403000 |
| C  | -4.60899400 | 2.60910300  | 0.82952500  |
| H  | -6.84813200 | 2.01591300  | -0.48411000 |
| H  | -5.22741900 | -0.64309700 | -3.45771200 |
| H  | -2.96269800 | -0.32934600 | -2.49592400 |
| O  | -5.03011500 | 3.74190800  | 0.64460300  |
| N  | -2.38739000 | 1.18454300  | -0.34658000 |
| Cl | -7.78510600 | 0.44522300  | -2.70452100 |
| C  | -3.62977900 | 3.18717800  | 3.03602900  |
| C  | -3.10716200 | 2.84013600  | 4.27766100  |
| C  | -2.99209200 | 1.49220200  | 4.63713700  |
| C  | -3.40000000 | 0.49164200  | 3.75138800  |
| C  | -3.90575200 | 0.83713600  | 2.49880600  |
| C  | -4.02062800 | 2.18685600  | 2.12889600  |
| H  | -3.74411500 | 4.22601300  | 2.74398900  |
| H  | -2.79310200 | 3.61585400  | 4.97005300  |
| H  | -2.58864700 | 1.22252700  | 5.60911400  |
| H  | -3.31968000 | -0.55373800 | 4.03295900  |
| H  | -4.23335100 | 0.05588600  | 1.81871900  |

### IM5

|   |             |             |             |
|---|-------------|-------------|-------------|
| C | -1.16735400 | 0.42913400  | -0.70155000 |
| C | -1.29763000 | -1.02732000 | -0.31481600 |
| H | -2.09051500 | -1.11795600 | 0.42835300  |
| N | 0.05374100  | 1.07725700  | -0.44085400 |
| C | 1.63302000  | 2.51196100  | 1.57590900  |
| C | 1.11254800  | 3.16386700  | 0.45128300  |
| C | 1.57926000  | 4.44306200  | 0.12520200  |
| C | 2.55600100  | 5.06036300  | 0.90715200  |
| C | 3.08688600  | 4.39763900  | 2.01566700  |
| C | 2.62494400  | 3.12209000  | 2.34616000  |

|    |             |             |             |
|----|-------------|-------------|-------------|
| H  | 1.26978800  | 1.52285500  | 1.83813100  |
| H  | 1.18364000  | 4.95516100  | -0.74953400 |
| H  | 2.91166400  | 6.05266100  | 0.64227600  |
| H  | 3.86311800  | 4.86596800  | 2.61377300  |
| H  | 3.04741300  | 2.59571400  | 3.19650400  |
| C  | -0.00114300 | 2.55544300  | -0.37476900 |
| H  | -0.96852400 | 2.76836000  | 0.09101500  |
| H  | -0.04994900 | 3.00934800  | -1.37352500 |
| C  | 4.63786600  | 2.88331700  | -1.68866700 |
| C  | 3.72261300  | 1.90864200  | -1.30210700 |
| C  | 2.58720400  | 1.75420100  | -2.08692500 |
| C  | 2.31656000  | 2.51499500  | -3.22014100 |
| C  | 3.24894200  | 3.48909500  | -3.57328900 |
| C  | 4.41547300  | 3.68808100  | -2.81743100 |
| H  | 5.53605200  | 2.99863500  | -1.08797900 |
| H  | 3.93607200  | 1.30941300  | -0.42185500 |
| H  | 1.43023600  | 2.33280000  | -3.81795000 |
| H  | 3.07123300  | 4.09408800  | -4.45822900 |
| C  | 5.42122500  | 4.74353900  | -3.20589300 |
| H  | 5.51162900  | 5.50405800  | -2.42077900 |
| H  | 6.41662400  | 4.30495400  | -3.34134200 |
| H  | 5.14123100  | 5.24750500  | -4.13555500 |
| S  | 1.38604300  | 0.42143400  | -1.68427100 |
| O  | 0.59606000  | 0.05266300  | -2.95109200 |
| O  | 2.11410900  | -0.70722800 | -0.90379800 |
| Au | 0.23785200  | -2.32728400 | 0.18115800  |
| Br | -1.74647100 | -2.27475800 | -1.82473200 |
| Br | 1.83671800  | -4.31769900 | 0.23879300  |
| Br | 0.47713800  | -1.43728100 | 2.54826800  |
| Br | 5.89794000  | 0.59881700  | 1.36451900  |
| K  | 3.84750500  | -1.74026300 | 1.05807300  |
| C  | -3.49967200 | 0.71458400  | -1.28312200 |
| C  | -4.48471600 | 0.75131300  | -0.26429600 |
| C  | -5.82088200 | 0.47644400  | -0.59403400 |
| C  | -6.17264800 | 0.17213000  | -1.90199900 |
| C  | -5.22191500 | 0.15949700  | -2.91835900 |
| C  | -3.89605100 | 0.44660500  | -2.60662500 |
| C  | -4.10585200 | 0.97796200  | 1.17080000  |
| H  | -6.57806800 | 0.48353300  | 0.18180700  |
| H  | -5.51169500 | -0.06257100 | -3.93955600 |
| H  | -3.14486700 | 0.47313800  | -3.38932100 |
| O  | -3.11549500 | 0.40922200  | 1.62759100  |
| N  | -2.17563800 | 1.11423100  | -1.08183500 |
| Cl | -7.88449400 | -0.19603800 | -2.28877400 |

|   |             |            |            |
|---|-------------|------------|------------|
| C | -4.79969700 | 1.74207700 | 3.42777900 |
| C | -5.51922000 | 2.57317300 | 4.27965400 |
| C | -6.36638900 | 3.55296600 | 3.75043800 |
| C | -6.49202400 | 3.69819500 | 2.36730600 |
| C | -5.78305200 | 2.85735900 | 1.50986200 |
| C | -4.93308700 | 1.86850200 | 2.03355100 |
| H | -4.12821500 | 0.98502100 | 3.81912200 |
| H | -5.41980500 | 2.46283900 | 5.35566100 |
| H | -6.92467000 | 4.20475900 | 4.41689200 |
| H | -7.13972900 | 4.46691400 | 1.95581600 |
| H | -5.87359400 | 2.98394900 | 0.43598200 |

**TS5-7**

|   |             |            |             |
|---|-------------|------------|-------------|
| C | -0.72789500 | 1.28396700 | -0.60488100 |
| C | -1.33701300 | 0.07671700 | -1.05205900 |
| H | -2.24548800 | 0.19796600 | -1.63141100 |
| N | 0.50284100  | 1.74866800 | -0.56873000 |
| C | 1.62050500  | 1.91597600 | 2.23944500  |
| C | 1.76925700  | 2.92251700 | 1.27816900  |
| C | 2.75712800  | 3.89803200 | 1.45269700  |
| C | 3.58851400  | 3.86866900 | 2.57318900  |
| C | 3.44855300  | 2.85193400 | 3.51992000  |
| C | 2.46368800  | 1.87616400 | 3.34775700  |
| H | 0.85492800  | 1.15428400 | 2.11823900  |
| H | 2.88224300  | 4.68176700 | 0.70776000  |
| H | 4.35352300  | 4.63131500 | 2.69965400  |
| H | 4.10569500  | 2.81396200 | 4.38323400  |
| H | 2.35912100  | 1.07824500 | 4.07696900  |
| C | 0.83902200  | 3.02807600 | 0.08835200  |
| H | -0.12372100 | 3.45617000 | 0.38980000  |
| H | 1.26842000  | 3.69110000 | -0.67247600 |
| C | 5.50937000  | 2.11644400 | -0.59870500 |
| C | 4.31487200  | 1.39942500 | -0.61901500 |
| C | 3.37481400  | 1.76937200 | -1.57195000 |
| C | 3.54856500  | 2.80572900 | -2.48863600 |
| C | 4.74904200  | 3.50788500 | -2.42936100 |
| C | 5.74241900  | 3.17525400 | -1.48963700 |
| H | 6.25875900  | 1.82213500 | 0.12971700  |
| H | 4.18423100  | 0.57491900 | 0.08184800  |
| H | 2.79315900  | 3.03225300 | -3.23197800 |
| H | 4.92189300  | 4.31943900 | -3.13147800 |
| C | 7.05459100  | 3.91867200 | -1.46404100 |
| H | 7.41706800  | 4.05074700 | -0.44013400 |
| H | 7.82529100  | 3.35564000 | -2.00817000 |

|    |             |             |             |
|----|-------------|-------------|-------------|
| H  | 6.97003200  | 4.90392300  | -1.93321300 |
| S  | 1.83070800  | 0.79413000  | -1.70312000 |
| O  | 1.20933300  | 0.94274100  | -3.08786200 |
| O  | 1.98587600  | -0.57560300 | -1.04089800 |
| Au | -0.77612600 | -1.84170400 | -0.70476300 |
| Br | -1.28542600 | -2.09864800 | -3.17986800 |
| Br | 0.00286600  | -4.26583700 | -0.52456900 |
| Br | -0.42250800 | -1.49098900 | 1.79629800  |
| Br | 5.34518600  | -1.17616300 | 1.66097100  |
| K  | 2.76023300  | -2.66642300 | 0.73240900  |
| C  | -2.93941800 | 2.24484200  | -0.30746800 |
| C  | -4.00044300 | 2.38224600  | 0.61674300  |
| C  | -5.19556600 | 2.96936900  | 0.20599500  |
| C  | -5.33446500 | 3.41105100  | -1.10903800 |
| C  | -4.29408800 | 3.30027400  | -2.03119400 |
| C  | -3.09761600 | 2.72002100  | -1.62749700 |
| C  | -3.81188700 | 1.99029500  | 2.07501700  |
| H  | -6.01559300 | 3.08823700  | 0.90772200  |
| H  | -4.41907700 | 3.66977600  | -3.04315600 |
| H  | -2.27037500 | 2.65280500  | -2.32898000 |
| O  | -3.41181300 | 2.84908100  | 2.84739100  |
| N  | -1.74727600 | 1.70234400  | 0.15801000  |
| Cl | -6.87692800 | 4.15438400  | -1.61880000 |
| C  | -3.87124100 | 0.23328900  | 3.82743700  |
| C  | -4.15204300 | -1.05640500 | 4.25964100  |
| C  | -4.70446000 | -1.98759200 | 3.37246300  |
| C  | -4.97973000 | -1.62340000 | 2.05272800  |
| C  | -4.69327300 | -0.33194800 | 1.61547000  |
| C  | -4.13450400 | 0.60550600  | 2.49851800  |
| H  | -3.44360500 | 0.97385000  | 4.49742200  |
| H  | -3.94263000 | -1.34344200 | 5.28783800  |
| H  | -4.92164200 | -2.99699400 | 3.71299500  |
| H  | -5.41325700 | -2.34652600 | 1.36604600  |
| H  | -4.91343800 | -0.04930400 | 0.58831400  |

### IM7

|   |             |             |             |
|---|-------------|-------------|-------------|
| C | -0.27226500 | 0.00140300  | 1.19191400  |
| C | -1.46736700 | 0.42823600  | 0.45559000  |
| H | -2.11071700 | 1.16452600  | 0.93410100  |
| N | 0.23114700  | -0.72186000 | 2.13980200  |
| C | -0.58337700 | -1.63050600 | 2.99492700  |
| H | 0.06987100  | -1.89622800 | 3.83041500  |
| H | -0.80295200 | -2.52414900 | 2.40443900  |
| C | 3.99544300  | -3.24480100 | -0.12505300 |

|    |             |             |             |
|----|-------------|-------------|-------------|
| C  | 3.47764100  | -2.08839300 | 0.45561300  |
| C  | 2.83865300  | -2.22831500 | 1.68050700  |
| C  | 2.68274000  | -3.44281100 | 2.34776400  |
| C  | 3.19511700  | -4.57780300 | 1.72818300  |
| C  | 3.84890600  | -4.49930100 | 0.48455700  |
| H  | 4.54202200  | -3.14170000 | -1.05796200 |
| H  | 3.65396800  | -1.12743400 | -0.02059500 |
| H  | 2.20993000  | -3.49914100 | 3.32199400  |
| H  | 3.09804300  | -5.53893900 | 2.22498800  |
| C  | 4.38301800  | -5.74039600 | -0.18476600 |
| H  | 3.68436600  | -6.09186400 | -0.95505000 |
| H  | 5.33902300  | -5.54229100 | -0.67972300 |
| H  | 4.52481700  | -6.55611900 | 0.53039700  |
| S  | 2.16318400  | -0.73405500 | 2.48860300  |
| O  | 2.18243900  | -0.87167300 | 4.00927500  |
| O  | 2.62733000  | 0.55291200  | 1.79491700  |
| Au | -2.44835700 | -0.72528700 | -0.97892100 |
| Br | -3.73611500 | -2.06021500 | -2.72273600 |
| Br | -3.89873400 | 1.31096700  | -1.39449200 |
| Br | 5.82301500  | 0.16466300  | -1.00494600 |
| Br | -0.90810300 | -2.71969200 | -0.55009100 |
| K  | 4.55293500  | 2.27314300  | 0.88064300  |
| C  | 0.82606100  | 1.30098300  | -0.77635900 |
| C  | 1.39656400  | 2.58455100  | -0.77295000 |
| C  | 2.21116000  | 2.96365100  | -1.84853200 |
| C  | 2.41073300  | 2.08799300  | -2.91050600 |
| C  | 1.85949800  | 0.80902300  | -2.90737700 |
| C  | 1.06722800  | 0.41438000  | -1.83086600 |
| C  | 1.29943600  | 3.54241800  | 0.39147900  |
| H  | 2.66811700  | 3.94749000  | -1.85960500 |
| H  | 2.04974600  | 0.12753700  | -3.72834100 |
| H  | 0.63581400  | -0.58127800 | -1.81181200 |
| O  | 2.35474200  | 3.87841800  | 0.93750600  |
| N  | -0.04455300 | 0.92862100  | 0.29220800  |
| Cl | 3.39939200  | 2.61771000  | -4.29333700 |
| C  | -0.05715900 | 4.81962900  | 2.02748300  |
| C  | -1.25607800 | 5.37955900  | 2.45174500  |
| C  | -2.41122400 | 5.23021400  | 1.67433800  |
| C  | -2.36505300 | 4.51918200  | 0.47303500  |
| C  | -1.16605900 | 3.94879700  | 0.04729100  |
| C  | -0.00292400 | 4.09169700  | 0.82362200  |
| H  | 0.85057600  | 4.93210100  | 2.61089500  |
| H  | -1.29545300 | 5.93550400  | 3.38410800  |
| H  | -3.34749900 | 5.67085400  | 2.00561700  |

|   |             |             |             |
|---|-------------|-------------|-------------|
| H | -3.25819100 | 4.40033900  | -0.13189300 |
| H | -1.13912800 | 3.40658800  | -0.89261400 |
| C | -1.84582200 | -0.97257300 | 3.50232200  |
| C | -3.09353900 | -1.36401000 | 3.00284100  |
| C | -1.77463900 | 0.02496700  | 4.48484900  |
| C | -4.26071100 | -0.76068700 | 3.47853100  |
| H | -3.15295500 | -2.13917600 | 2.24299500  |
| C | -2.93977200 | 0.62846900  | 4.95546400  |
| H | -0.80574600 | 0.32099400  | 4.88112000  |
| C | -4.18436100 | 0.23696000  | 4.45159600  |
| H | -5.22473600 | -1.07034900 | 3.08577200  |
| H | -2.87877900 | 1.39791700  | 5.72006100  |
| H | -5.09183900 | 0.70662500  | 4.82049500  |

**TS7-8**

|    |             |             |             |
|----|-------------|-------------|-------------|
| C  | -0.21935800 | -1.04914500 | 0.73722700  |
| C  | 1.24997400  | -1.06646900 | 0.53849800  |
| H  | 1.64467700  | -2.04014200 | 0.25976600  |
| N  | -0.69120600 | -0.48465700 | 1.89198600  |
| C  | 0.33527900  | -0.14500600 | 2.87892000  |
| H  | -0.11277700 | -0.25448700 | 3.87176100  |
| H  | 0.62257500  | 0.90166800  | 2.74405300  |
| C  | -5.72011000 | 0.53937600  | 0.99283200  |
| C  | -4.77915400 | -0.36811500 | 1.47805900  |
| C  | -3.56484200 | 0.14369300  | 1.91875400  |
| C  | -3.24857700 | 1.49707800  | 1.89976900  |
| C  | -4.19986600 | 2.37834100  | 1.39160400  |
| C  | -5.44793500 | 1.91501800  | 0.94223000  |
| H  | -6.67426900 | 0.16593700  | 0.63143800  |
| H  | -4.97016300 | -1.43565900 | 1.48903500  |
| H  | -2.28145500 | 1.86613100  | 2.22259000  |
| H  | -3.94366000 | 3.43188800  | 1.32064800  |
| C  | -6.47704600 | 2.88771900  | 0.42003900  |
| H  | -7.20495800 | 2.39287700  | -0.23022300 |
| H  | -7.03174700 | 3.34663600  | 1.24898100  |
| H  | -6.00511500 | 3.70016800  | -0.14185600 |
| S  | -2.36151200 | -1.04761300 | 2.62075000  |
| O  | -2.14765500 | -0.80329500 | 4.11883700  |
| O  | -2.62717400 | -2.46253100 | 2.09930500  |
| Au | 2.31322500  | 0.46625300  | -0.31727200 |
| Br | 3.67743900  | 2.35799500  | -1.43788900 |
| Br | 4.12810800  | -1.26632400 | -0.92535900 |
| Br | -1.44055000 | 4.92515900  | 0.12075200  |
| Br | 0.45421300  | 2.19938800  | 0.17488300  |



|    |             |             |             |
|----|-------------|-------------|-------------|
| K  | 1.40731700  | 4.89391700  | -1.31191800 |
| C  | -1.96065800 | -1.44086900 | -0.94293100 |
| C  | -2.67852900 | -2.57584700 | -1.39290400 |
| C  | -3.88353400 | -2.38653300 | -2.08070500 |
| C  | -4.31315600 | -1.10493400 | -2.39468700 |
| C  | -3.59376900 | 0.02204900  | -2.00164700 |
| C  | -2.43058800 | -0.14961000 | -1.26180700 |
| C  | -2.32168800 | -4.00817100 | -1.06207200 |
| H  | -4.46756100 | -3.25428500 | -2.36463300 |
| H  | -3.94083700 | 1.01736000  | -2.25572000 |
| H  | -1.86336300 | 0.71621100  | -0.93731100 |
| O  | -3.21579900 | -4.75391800 | -0.68428300 |
| N  | -0.75226400 | -1.59785200 | -0.28182300 |
| Cl | -5.83874100 | -0.89151300 | -3.31870500 |
| C  | -0.57797100 | -5.71888400 | -0.61346100 |
| C  | 0.68369500  | -6.27467800 | -0.80802200 |
| C  | 1.59475000  | -5.65611500 | -1.67074500 |
| C  | 1.24031800  | -4.47986700 | -2.33700100 |
| C  | -0.01714700 | -3.91324400 | -2.12911800 |
| C  | -0.93409500 | -4.52515800 | -1.26147200 |
| H  | -1.30763400 | -6.19316600 | 0.03487600  |
| H  | 0.95602400  | -7.19419100 | -0.29673400 |
| H  | 2.57738800  | -6.09258200 | -1.82907900 |
| H  | 1.94332100  | -4.00289000 | -3.01362800 |
| H  | -0.28954600 | -3.00094400 | -2.64980600 |
| C  | 1.56357700  | -1.04654300 | 2.74331400  |
| C  | 2.86113400  | -0.47944200 | 2.85792400  |
| C  | 1.43539100  | -2.45724100 | 2.89117100  |
| C  | 3.97745100  | -1.28318200 | 3.04397000  |
| H  | 2.97119000  | 0.59906800  | 2.78411200  |
| C  | 2.55589800  | -3.25534900 | 3.07331900  |
| H  | 0.44680100  | -2.90845300 | 2.84734000  |
| C  | 3.82671700  | -2.67043100 | 3.15076400  |
| H  | 4.96446200  | -0.83553900 | 3.09734000  |
| H  | 2.44392700  | -4.33114200 | 3.16545000  |
| H  | 4.70173700  | -3.29810900 | 3.29200500  |

### IM8

|   |             |             |            |
|---|-------------|-------------|------------|
| C | 0.64572500  | 0.10093400  | 0.48816600 |
| C | -0.72311900 | 0.47607500  | 1.00084500 |
| H | -0.70749800 | 1.47657000  | 1.42850500 |
| N | 0.95493800  | -1.25033600 | 0.81306000 |
| C | -0.20710300 | -1.86208900 | 1.39417600 |
| H | 0.05377300  | -2.60716900 | 2.14716700 |

|    |             |             |             |
|----|-------------|-------------|-------------|
| H  | -0.82902100 | -2.32046300 | 0.61776800  |
| C  | 6.13194300  | -1.65379400 | 0.38142500  |
| C  | 5.01626400  | -1.14527400 | 1.04341500  |
| C  | 3.92662800  | -1.99455800 | 1.19695500  |
| C  | 3.89965800  | -3.30609800 | 0.74088400  |
| C  | 5.02837700  | -3.78045900 | 0.07453400  |
| C  | 6.15375300  | -2.96508000 | -0.11878500 |
| H  | 6.99673800  | -1.01143800 | 0.24051000  |
| H  | 4.99257200  | -0.12466500 | 1.41258800  |
| H  | 3.03560300  | -3.94094400 | 0.90490700  |
| H  | 5.03283100  | -4.80080600 | -0.29849600 |
| C  | 7.36604700  | -3.47232800 | -0.86117100 |
| H  | 7.54268000  | -2.87606300 | -1.76447500 |
| H  | 8.26857900  | -3.39777100 | -0.24298200 |
| H  | 7.24720700  | -4.51727700 | -1.16173900 |
| S  | 2.47570000  | -1.37347100 | 2.12702300  |
| O  | 1.98129000  | -2.47060100 | 3.08633400  |
| O  | 2.75070200  | 0.04883800  | 2.64565700  |
| Au | -2.21255900 | 0.71840300  | -0.53399300 |
| Br | -4.17398400 | 1.00859700  | -2.24801900 |
| Br | -3.37164500 | 2.27305900  | 1.09502400  |
| Br | -3.34427200 | -3.83793100 | 0.46850200  |
| Br | -1.08562300 | -0.91778200 | -2.15274000 |
| K  | -4.13554200 | -2.32646000 | -2.21265300 |
| C  | 2.56393100  | 0.72426200  | -0.78918800 |
| C  | 3.67058300  | 1.58348300  | -0.59923600 |
| C  | 4.83580500  | 1.38495700  | -1.35051900 |
| C  | 4.87251800  | 0.39451100  | -2.32059700 |
| C  | 3.78549900  | -0.44692200 | -2.54348700 |
| C  | 2.64455900  | -0.29043100 | -1.76525300 |
| C  | 3.75631700  | 2.60321100  | 0.51498000  |
| H  | 5.70329000  | 2.00747600  | -1.16211700 |
| H  | 3.83230300  | -1.21648100 | -3.30627200 |
| H  | 1.78758700  | -0.93459900 | -1.92070300 |
| O  | 4.69538700  | 2.50844300  | 1.29938500  |
| N  | 1.37565400  | 0.96447400  | -0.09988100 |
| Cl | 6.37228600  | 0.16780900  | -3.29033600 |
| C  | 2.75297900  | 4.48072300  | 1.79186100  |
| C  | 1.87226600  | 5.55086900  | 1.91749700  |
| C  | 1.01380700  | 5.87679300  | 0.86185800  |
| C  | 1.03861400  | 5.12985100  | -0.31900200 |
| C  | 1.91078100  | 4.04933600  | -0.44153100 |
| C  | 2.77207000  | 3.71492800  | 0.61445300  |
| H  | 3.43519600  | 4.21523000  | 2.59280300  |

|   |             |             |             |
|---|-------------|-------------|-------------|
| H | 1.85382100  | 6.13439600  | 2.83389100  |
| H | 0.32703800  | 6.71341500  | 0.95888600  |
| H | 0.37622300  | 5.38651300  | -1.14077400 |
| H | 1.92482300  | 3.46732900  | -1.35715300 |
| C | -1.10092900 | -0.62387000 | 2.04739200  |
| C | -2.50076500 | -1.06600100 | 2.10311600  |
| C | -0.51585800 | -0.29877700 | 3.36949300  |
| C | -3.15628200 | -1.30231000 | 3.29688700  |
| H | -3.01760900 | -1.25852200 | 1.17292300  |
| C | -1.19888700 | -0.49726500 | 4.53804400  |
| H | 0.49716100  | 0.09462600  | 3.39553800  |
| C | -2.51654400 | -1.01250700 | 4.50364200  |
| H | -4.16782100 | -1.69224000 | 3.28332800  |
| H | -0.73395000 | -0.26466900 | 5.49059500  |
| H | -3.04572600 | -1.17422500 | 5.43932500  |

### TS8-9

|    |             |             |             |
|----|-------------|-------------|-------------|
| C  | -0.53375200 | -0.32440600 | -0.72844600 |
| C  | 0.92418200  | -0.39632600 | -1.07412600 |
| H  | 1.29688800  | 0.55827600  | -1.43893000 |
| N  | -1.40129400 | -1.32412600 | -1.18490700 |
| C  | -0.71774700 | -2.46040300 | -1.79303500 |
| H  | -1.37247300 | -2.87422900 | -2.57144300 |
| H  | -0.58408900 | -3.22258400 | -1.01993400 |
| C  | -6.04950700 | 0.87888300  | -0.59394800 |
| C  | -4.82920100 | 0.80238400  | -1.26265800 |
| C  | -4.32686800 | -0.46705400 | -1.52152900 |
| C  | -4.97366500 | -1.64233100 | -1.16034200 |
| C  | -6.18647000 | -1.52978700 | -0.48358400 |
| C  | -6.73771300 | -0.27407000 | -0.18595000 |
| H  | -6.46392200 | 1.85880000  | -0.37400600 |
| H  | -4.29061900 | 1.69902300  | -1.55279600 |
| H  | -4.55442500 | -2.61288100 | -1.40166300 |
| H  | -6.70893400 | -2.43279600 | -0.18090400 |
| C  | -8.03227700 | -0.15344800 | 0.58002600  |
| H  | -7.85350300 | 0.29442400  | 1.56530700  |
| H  | -8.74582600 | 0.49208200  | 0.05498000  |
| H  | -8.50324500 | -1.12869200 | 0.73297800  |
| S  | -2.75422200 | -0.60662300 | -2.45210000 |
| O  | -2.87443900 | -1.75393900 | -3.46929900 |
| O  | -2.25650700 | 0.78039600  | -2.88853900 |
| Au | 2.36835500  | -1.15657700 | 0.20425300  |
| Br | 4.19064500  | -2.05719100 | 1.81063800  |
| Br | 4.08882600  | 0.43541700  | -0.91206000 |

|    |             |             |             |
|----|-------------|-------------|-------------|
| Br | -0.86946300 | -4.23894100 | 3.87534400  |
| Br | 0.61394000  | -2.57468100 | 1.48774400  |
| K  | 2.22159500  | -3.53567900 | 4.11664200  |
| C  | -1.92278100 | 0.95315000  | 0.75790900  |
| C  | -2.50224300 | 2.24105800  | 0.74742600  |
| C  | -3.59969700 | 2.50831200  | 1.57483700  |
| C  | -4.05888400 | 1.53143700  | 2.44640200  |
| C  | -3.47795000 | 0.26619300  | 2.49894100  |
| C  | -2.42204900 | -0.02443200 | 1.64235500  |
| C  | -2.12466600 | 3.31114300  | -0.25308300 |
| H  | -4.08307900 | 3.47765700  | 1.52582000  |
| H  | -3.84289100 | -0.48440800 | 3.19152400  |
| H  | -1.95986900 | -1.00502700 | 1.67228500  |
| O  | -3.00450600 | 3.73164200  | -0.99923600 |
| N  | -0.79244400 | 0.70631900  | -0.02364400 |
| Cl | -5.45911700 | 1.90138500  | 3.51546500  |
| C  | -0.39304100 | 4.69891800  | -1.36644800 |
| C  | 0.87534300  | 5.26805100  | -1.42623600 |
| C  | 1.79814700  | 5.02747100  | -0.40231300 |
| C  | 1.44848900  | 4.21772300  | 0.68163800  |
| C  | 0.18165100  | 3.63914000  | 0.73855800  |
| C  | -0.74713400 | 3.87218300  | -0.28713500 |
| H  | -1.12787300 | 4.87738900  | -2.14465200 |
| H  | 1.14783400  | 5.90012500  | -2.26697000 |
| H  | 2.78914300  | 5.47085100  | -0.44869600 |
| H  | 2.16451700  | 4.03316300  | 1.47713400  |
| H  | -0.08841400 | 3.00837100  | 1.57919600  |
| C  | 0.62402800  | -2.10840600 | -2.41144600 |
| C  | 1.66057500  | -3.08095400 | -2.41304900 |
| C  | 0.81199100  | -0.91245800 | -3.15767300 |
| C  | 2.82220900  | -2.85969200 | -3.12095100 |
| H  | 1.52087900  | -3.99706100 | -1.84715200 |
| C  | 2.02420800  | -0.69619200 | -3.86204900 |
| H  | -0.01994800 | -0.23276000 | -3.32337800 |
| C  | 3.01377400  | -1.65424100 | -3.84041300 |
| H  | 3.60771700  | -3.60949200 | -3.11692200 |
| H  | 2.15274700  | 0.22431200  | -4.42176100 |
| H  | 3.94356700  | -1.49179300 | -4.37579600 |

**IM9**

|   |             |             |             |
|---|-------------|-------------|-------------|
| C | -0.83259400 | -0.76872300 | -0.29114100 |
| C | 0.41867500  | -0.53235600 | -1.09176500 |
| H | 0.15890300  | 0.05349500  | -1.97192300 |
| N | -1.19573200 | -2.11549000 | 0.04964600  |

|    |             |             |             |
|----|-------------|-------------|-------------|
| C  | -0.09157400 | -3.02373700 | 0.37860300  |
| H  | -0.47892200 | -4.04627200 | 0.28645200  |
| H  | 0.14552400  | -2.85982200 | 1.43645800  |
| C  | -5.84556000 | -1.06176700 | -1.29094900 |
| C  | -4.51668400 | -1.35594100 | -1.59118100 |
| C  | -3.97712400 | -2.51756500 | -1.05666600 |
| C  | -4.69656700 | -3.39969100 | -0.25851700 |
| C  | -6.02551700 | -3.08615600 | 0.01534500  |
| C  | -6.61399800 | -1.91184400 | -0.48263300 |
| H  | -6.26824500 | -0.13987100 | -1.67760100 |
| H  | -3.93015100 | -0.69127100 | -2.21412600 |
| H  | -4.23531000 | -4.30569800 | 0.11864300  |
| H  | -6.61331800 | -3.76228500 | 0.63050500  |
| C  | -8.03330900 | -1.54982400 | -0.11916800 |
| H  | -8.04965200 | -0.93596500 | 0.79116600  |
| H  | -8.51516500 | -0.97058300 | -0.91299700 |
| H  | -8.63980100 | -2.44036800 | 0.07436300  |
| S  | -2.22709800 | -2.91966100 | -1.41183100 |
| O  | -2.00795300 | -4.42907300 | -1.20594100 |
| O  | -1.79409900 | -2.23331500 | -2.72584700 |
| Au | 1.71792500  | 0.87116500  | -0.10146700 |
| Br | 3.31032300  | 2.66443000  | 1.02343300  |
| Br | 2.04757200  | 1.99583300  | -2.34713600 |
| Br | 5.34353900  | -2.85328200 | 0.61436400  |
| Br | 1.48428200  | -0.34506900 | 2.16112200  |
| K  | 4.81856600  | -0.02384100 | 2.03648500  |
| C  | -2.67462600 | 0.32519800  | 0.80853800  |
| C  | -3.63015100 | 1.31504300  | 0.48477200  |
| C  | -4.78333500 | 1.45664700  | 1.26124100  |
| C  | -4.94169800 | 0.67026000  | 2.39453600  |
| C  | -3.98612600 | -0.27118300 | 2.77121500  |
| C  | -2.86414800 | -0.45082400 | 1.97003500  |
| C  | -3.51973500 | 2.15499500  | -0.77333000 |
| H  | -5.54026300 | 2.18212400  | 0.98388200  |
| H  | -4.12321700 | -0.86076500 | 3.67107600  |
| H  | -2.12189800 | -1.19081700 | 2.24036200  |
| O  | -4.31320100 | 1.93677800  | -1.68500600 |
| N  | -1.54437000 | 0.25789300  | -0.00572100 |
| Cl | -6.42351900 | 0.86495800  | 3.39533700  |
| C  | -2.40032100 | 3.96232000  | -2.05307900 |
| C  | -1.47810300 | 4.99762100  | -2.16600300 |
| C  | -0.66360200 | 5.32968800  | -1.07791500 |
| C  | -0.77805800 | 4.62903500  | 0.12553800  |
| C  | -1.70122400 | 3.59120400  | 0.24089400  |

|   |             |             |             |
|---|-------------|-------------|-------------|
| C | -2.51583200 | 3.24636100  | -0.84936100 |
| H | -3.04162700 | 3.68661500  | -2.88378400 |
| H | -1.38750300 | 5.54468400  | -3.10026300 |
| H | 0.06343300  | 6.13187800  | -1.16898800 |
| H | -0.14055100 | 4.88292300  | 0.96707400  |
| H | -1.78524300 | 3.04547400  | 1.17520800  |
| C | 1.16485800  | -2.86745700 | -0.44469000 |
| C | 2.24608500  | -3.67410700 | -0.26957800 |
| C | 1.13065100  | -1.83483900 | -1.52032200 |
| C | 3.41549700  | -3.51561500 | -1.07506100 |
| H | 2.23567800  | -4.46185900 | 0.47839900  |
| C | 2.40775700  | -1.66414300 | -2.26819200 |
| H | 0.41898200  | -2.24057200 | -2.27948300 |
| C | 3.47035400  | -2.48010600 | -2.07001400 |
| H | 4.10636500  | -4.34421600 | -1.15091000 |
| H | 2.43232600  | -0.89289200 | -3.03198000 |
| H | 4.37292200  | -2.37655300 | -2.66273300 |

**TS9-10**

|    |             |             |             |
|----|-------------|-------------|-------------|
| C  | -0.07423300 | -0.43792000 | 0.03989900  |
| C  | 1.07868900  | -1.09675600 | -0.65701600 |
| H  | 1.16138500  | -0.69307100 | -1.66711200 |
| N  | -1.19149000 | -1.28486600 | 0.44943600  |
| C  | -0.77865600 | -2.53732800 | 1.10874400  |
| H  | -1.66611500 | -3.16620200 | 1.24560400  |
| H  | -0.43127400 | -2.24685900 | 2.10729500  |
| C  | -5.97294800 | -2.31568700 | 0.30019400  |
| C  | -4.80777400 | -1.67443300 | -0.11333700 |
| C  | -3.75490500 | -2.47756800 | -0.53267700 |
| C  | -3.80349400 | -3.87037400 | -0.56333700 |
| C  | -4.98108900 | -4.47775700 | -0.13288800 |
| C  | -6.07694900 | -3.71547100 | 0.30588000  |
| H  | -6.81128000 | -1.69168900 | 0.59838700  |
| H  | -4.79189100 | -0.58499900 | -0.13952300 |
| H  | -2.96912000 | -4.45190700 | -0.93893300 |
| H  | -5.05372400 | -5.56161700 | -0.15367300 |
| C  | -7.35117000 | -4.38076600 | 0.76308200  |
| H  | -7.55219600 | -4.15681100 | 1.81770300  |
| H  | -8.20992400 | -4.01367000 | 0.18949000  |
| H  | -7.30424600 | -5.46775700 | 0.65041400  |
| S  | -2.22540000 | -1.65886400 | -1.11199200 |
| O  | -1.42451800 | -2.71722900 | -1.98282500 |
| O  | -2.48896000 | -0.28398000 | -1.73972500 |
| Au | 2.97949700  | -0.49970500 | 0.17295300  |

|    |             |             |             |
|----|-------------|-------------|-------------|
| Br | 5.23458400  | 0.28620500  | 1.10352000  |
| Br | 3.74474300  | -0.03043900 | -2.20942500 |
| Br | -6.27331600 | 1.52097500  | -0.53499000 |
| Br | 2.23597600  | -1.22918800 | 2.50482700  |
| K  | -3.61266700 | 2.21142100  | -2.01450200 |
| C  | -1.01243300 | 1.62800100  | 0.84792100  |
| C  | -1.17062500 | 2.94173500  | 0.34969900  |
| C  | -2.04955700 | 3.83066400  | 0.97668400  |
| C  | -2.71054900 | 3.43756800  | 2.13596800  |
| C  | -2.54013300 | 2.16076800  | 2.66782500  |
| C  | -1.70402600 | 1.25916800  | 2.01833100  |
| C  | -0.50832300 | 3.38996700  | -0.93713200 |
| H  | -2.19402700 | 4.82989600  | 0.57907600  |
| H  | -3.06033000 | 1.87563900  | 3.57526900  |
| H  | -1.56395200 | 0.26769900  | 2.42921700  |
| O  | -1.22907600 | 3.50487200  | -1.93540900 |
| N  | -0.07993600 | 0.82578500  | 0.19160300  |
| Cl | -3.78462600 | 4.59891400  | 2.96318800  |
| C  | 1.49950800  | 4.15076700  | -2.17547200 |
| C  | 2.85038200  | 4.47185400  | -2.23428200 |
| C  | 3.64361800  | 4.36940400  | -1.08557600 |
| C  | 3.08256700  | 3.95570200  | 0.12538800  |
| C  | 1.72787600  | 3.64055100  | 0.19020200  |
| C  | 0.92624600  | 3.72873100  | -0.96133400 |
| H  | 0.86961000  | 4.21413500  | -3.05646100 |
| H  | 3.29181900  | 4.79298600  | -3.17327700 |
| H  | 4.70273500  | 4.60520400  | -1.13591500 |
| H  | 3.70321000  | 3.86315300  | 1.01085000  |
| H  | 1.29517300  | 3.31470000  | 1.13012500  |
| C  | 0.32497600  | -3.29648900 | 0.40332100  |
| C  | 0.60260600  | -4.62707300 | 0.67885100  |
| C  | 0.98416300  | -2.62505900 | -0.69817300 |
| C  | 1.57074500  | -5.30621200 | -0.06762200 |
| H  | 0.07515300  | -5.14096300 | 1.47799000  |
| C  | 1.99516400  | -3.36365100 | -1.42309700 |
| H  | 0.00500300  | -2.77822100 | -1.44519300 |
| C  | 2.25397900  | -4.68561100 | -1.12908000 |
| H  | 1.78811200  | -6.34422600 | 0.16953700  |
| H  | 2.53330000  | -2.84745800 | -2.21364200 |
| H  | 2.99705400  | -5.23838400 | -1.69431500 |

**IM10**

|   |             |             |             |
|---|-------------|-------------|-------------|
| C | 0.44411200  | -0.41952000 | -0.15026400 |
| C | -0.59422500 | -1.39206200 | 0.30252100  |

|    |             |             |             |
|----|-------------|-------------|-------------|
| H  | -0.97398600 | -1.09249400 | 1.27591800  |
| N  | 1.76068800  | -0.93768700 | -0.51767700 |
| C  | 1.74835800  | -2.30172800 | -1.10017400 |
| H  | 2.78454200  | -2.63502300 | -1.21793800 |
| H  | 1.34279400  | -2.13314400 | -2.10644700 |
| C  | 6.18836000  | -0.35707200 | -1.47007500 |
| C  | 4.93471500  | -0.18816700 | -0.89144700 |
| C  | 4.55698700  | -1.08640300 | 0.10424700  |
| C  | 5.36716300  | -2.12337500 | 0.55005000  |
| C  | 6.61850800  | -2.26456600 | -0.05190400 |
| C  | 7.04777600  | -1.39212300 | -1.06138900 |
| H  | 6.50603300  | 0.32973700  | -2.24985400 |
| H  | 4.27329600  | 0.61155000  | -1.20933300 |
| H  | 5.03731900  | -2.79177600 | 1.33616500  |
| H  | 7.27088100  | -3.06813200 | 0.27737200  |
| C  | 8.40647600  | -1.54776100 | -1.69838500 |
| H  | 8.32158100  | -1.66011700 | -2.78557400 |
| H  | 9.02850600  | -0.66379000 | -1.51298700 |
| H  | 8.93646300  | -2.42048300 | -1.30747300 |
| S  | 2.93583800  | -0.78617000 | 0.90356000  |
| O  | 2.86143400  | -2.03496100 | 1.98821800  |
| O  | 2.77857700  | 0.61400900  | 1.49398300  |
| Au | -2.42754000 | -0.99024000 | -0.82175800 |
| Br | -4.61195600 | -0.47633300 | -2.08840700 |
| Br | -3.61223500 | -0.53585600 | 1.42814000  |
| Br | 0.85214200  | -1.48837300 | 4.18968600  |
| Br | -1.21656300 | -1.41910500 | -3.02563800 |
| K  | -1.14466900 | 0.86485900  | 3.28453900  |
| C  | 0.96279800  | 1.82510000  | -0.78497800 |
| C  | 0.99139300  | 3.13611200  | -0.23603900 |
| C  | 1.70320700  | 4.15014600  | -0.89851400 |
| C  | 2.34026400  | 3.88694100  | -2.10067200 |
| C  | 2.24764000  | 2.63312100  | -2.70158000 |
| C  | 1.56211900  | 1.61680700  | -2.04636200 |
| C  | 0.29315700  | 3.46417600  | 1.04103600  |
| H  | 1.75836300  | 5.14146600  | -0.46495600 |
| H  | 2.69339300  | 2.45723300  | -3.67493800 |
| H  | 1.44327100  | 0.65460900  | -2.52927400 |
| O  | 0.21631900  | 2.64229800  | 1.95560900  |
| N  | 0.18872700  | 0.83344300  | -0.19471700 |
| Cl | 3.26489200  | 5.19064500  | -2.91514200 |
| C  | -0.40959700 | 5.35818300  | 2.49968300  |
| C  | -1.04193400 | 6.57943600  | 2.71201300  |
| C  | -1.63322500 | 7.25569500  | 1.63946400  |



|   |             |             |             |
|---|-------------|-------------|-------------|
| C | -1.58143900 | 6.71131500  | 0.35495700  |
| C | -0.92621700 | 5.49969400  | 0.13419400  |
| C | -0.33492800 | 4.81131500  | 1.20685300  |
| H | 0.04932200  | 4.82107500  | 3.32427800  |
| H | -1.07750400 | 7.00550000  | 3.71069200  |
| H | -2.13574200 | 8.20428900  | 1.80687700  |
| H | -2.05341700 | 7.22689500  | -0.47619800 |
| H | -0.90038700 | 5.07480300  | -0.86404700 |
| C | 0.90727000  | -3.29902300 | -0.34940500 |
| C | 1.24561900  | -4.65230200 | -0.31499800 |
| C | -0.24090000 | -2.83580200 | 0.31372300  |
| C | 0.44073100  | -5.56139100 | 0.37157900  |
| H | 2.14305800  | -4.99627100 | -0.82503800 |
| C | -1.03098200 | -3.75619400 | 1.02348900  |
| H | 2.13262000  | -1.82203700 | 2.75681200  |
| C | -0.69702000 | -5.10712300 | 1.04553400  |
| H | 0.70676200  | -6.61419100 | 0.39330300  |
| H | -1.91187700 | -3.40315000 | 1.55198700  |
| H | -1.31968200 | -5.80549700 | 1.59672700  |

**TS10-11**

|   |             |             |             |
|---|-------------|-------------|-------------|
| C | 0.40897600  | -0.45221600 | -0.19935100 |
| C | -0.66044700 | -1.40659000 | 0.22278700  |
| H | -1.00231000 | -1.16605600 | 1.22591800  |
| N | 1.69161100  | -0.99704300 | -0.61624000 |
| C | 1.62696600  | -2.32116600 | -1.27833500 |
| H | 2.65068100  | -2.69092400 | -1.39988400 |
| H | 1.24573200  | -2.08649400 | -2.28050700 |
| C | 6.11096400  | -0.25529200 | -1.49325800 |
| C | 4.85496400  | -0.16316800 | -0.90181700 |
| C | 4.49020800  | -1.16232500 | -0.00329900 |
| C | 5.31357800  | -2.22945100 | 0.33256900  |
| C | 6.56646600  | -2.29361700 | -0.27899900 |
| C | 6.98289100  | -1.31679900 | -1.19392200 |
| H | 6.42081300  | 0.51214400  | -2.19734200 |
| H | 4.18214200  | 0.65488700  | -1.13757500 |
| H | 4.98844400  | -2.97753200 | 1.04612900  |
| H | 7.23001200  | -3.11788700 | -0.03373800 |
| C | 8.33546900  | -1.39970100 | -1.85762400 |
| H | 8.23270000  | -1.61936000 | -2.92767300 |
| H | 8.87589900  | -0.45018000 | -1.77363200 |
| H | 8.95415900  | -2.18422900 | -1.41334000 |
| S | 2.86603500  | -0.99201300 | 0.82809500  |
| O | 2.76111600  | -2.31544600 | 1.75374000  |

|    |             |             |             |
|----|-------------|-------------|-------------|
| O  | 2.67185600  | 0.34650400  | 1.54900100  |
| Au | -2.50929400 | -0.82992200 | -0.78500500 |
| Br | -4.70781800 | -0.11355200 | -1.91684800 |
| Br | -3.53698900 | -0.40632200 | 1.55209300  |
| Br | 1.05279500  | -2.00552400 | 4.11400600  |
| Br | -1.41178400 | -1.22895700 | -3.05058000 |
| K  | -0.75287300 | 0.61314400  | 3.25451000  |
| C  | 1.00026500  | 1.79833000  | -0.73354200 |
| C  | 1.09816100  | 3.08795700  | -0.14227000 |
| C  | 1.82535600  | 4.09812000  | -0.79441300 |
| C  | 2.41322300  | 3.85514700  | -2.02537100 |
| C  | 2.25261800  | 2.62803300  | -2.66518000 |
| C  | 1.54944200  | 1.61619300  | -2.02199800 |
| C  | 0.46576000  | 3.40736200  | 1.17163100  |
| H  | 1.93083900  | 5.07112400  | -0.32971500 |
| H  | 2.65916700  | 2.46930900  | -3.65841100 |
| H  | 1.37919100  | 0.67767900  | -2.53459500 |
| O  | 0.42699700  | 2.57610600  | 2.08023400  |
| N  | 0.20310300  | 0.81270400  | -0.15940600 |
| Cl | 3.36039300  | 5.15235800  | -2.82442700 |
| C  | -0.15963400 | 5.27698000  | 2.69340400  |
| C  | -0.75727500 | 6.50651300  | 2.95163100  |
| C  | -1.35966400 | 7.22243500  | 1.91142300  |
| C  | -1.35501400 | 6.70854400  | 0.61339900  |
| C  | -0.73504100 | 5.48781000  | 0.34641900  |
| C  | -0.13138700 | 4.76054500  | 1.38614600  |
| H  | 0.30589400  | 4.70791800  | 3.49221400  |
| H  | -0.75793200 | 6.90818000  | 3.96099400  |
| H  | -1.83490900 | 8.17801600  | 2.11494600  |
| H  | -1.83665800 | 7.25491300  | -0.19208500 |
| H  | -0.74598800 | 5.08665200  | -0.66177700 |
| C  | 0.73832700  | -3.32834900 | -0.59591900 |
| C  | 1.00464300  | -4.69602700 | -0.67275900 |
| C  | -0.37764900 | -2.86257400 | 0.11757200  |
| C  | 0.16060300  | -5.61478700 | -0.04937300 |
| H  | 1.87836600  | -5.04395100 | -1.21986300 |
| C  | -1.20839300 | -3.79503600 | 0.76288500  |
| H  | 2.03273900  | -2.15614200 | 2.73255500  |
| C  | -0.94559700 | -5.15872600 | 0.67422400  |
| H  | 0.37167200  | -6.67816100 | -0.11530000 |
| H  | -2.06783700 | -3.44071000 | 1.32551200  |
| H  | -1.59976200 | -5.86633200 | 1.17494000  |

IM11

|    |              |             |             |
|----|--------------|-------------|-------------|
| C  | -1.40451800  | -0.48509600 | -0.38442000 |
| C  | -0.48981900  | -1.58585000 | -0.83701600 |
| H  | 0.03555200   | -1.27656300 | -1.73797200 |
| N  | -2.74604100  | -0.80330500 | -0.04049900 |
| C  | -2.96425600  | -2.17049500 | 0.46698300  |
| H  | -4.04261100  | -2.35735100 | 0.48478000  |
| H  | -2.62942200  | -2.14161200 | 1.51167000  |
| C  | -6.94861900  | 1.28717100  | 0.56673100  |
| C  | -5.73002000  | 1.06826600  | -0.07149600 |
| C  | -5.52071900  | -0.16826100 | -0.66939800 |
| C  | -6.47356900  | -1.17831200 | -0.66872300 |
| C  | -7.68599400  | -0.93503600 | -0.02184100 |
| C  | -7.93905400  | 0.29175000  | 0.60753400  |
| H  | -7.13714800  | 2.24986200  | 1.03486300  |
| H  | -4.96783800  | 1.83858900  | -0.11371700 |
| H  | -6.27539300  | -2.11498900 | -1.17887400 |
| H  | -8.44830700  | -1.70950200 | -0.01426300 |
| C  | -9.24275100  | 0.53737700  | 1.32836300  |
| H  | -9.12807000  | 0.37717100  | 2.40846700  |
| H  | -9.58913900  | 1.56675400  | 1.18850400  |
| H  | -10.02878600 | -0.13831900 | 0.97786800  |
| S  | -3.93020000  | -0.47056000 | -1.54630900 |
| O  | -4.08461500  | -1.76367700 | -2.36222300 |
| O  | -3.42089800  | 0.82758200  | -2.17532200 |
| Au | 1.31429500   | -1.48276000 | 0.43238100  |
| Br | 3.55513100   | -0.90556600 | 1.91412800  |
| Br | 2.72667500   | -1.56717900 | -1.74376500 |
| Br | 6.60024500   | 0.18821800  | 0.25516200  |
| Br | -0.04117200  | -1.55114200 | 2.58231200  |
| K  | 3.49326100   | 1.40999600  | -0.60719400 |
| C  | -1.52038900  | 1.87389100  | 0.06478000  |
| C  | -1.07094300  | 3.09435700  | -0.49800100 |
| C  | -1.54016100  | 4.31825400  | -0.00977100 |
| C  | -2.43436600  | 4.33304600  | 1.05329600  |
| C  | -2.84749400  | 3.15214600  | 1.66558600  |
| C  | -2.39527800  | 1.93288500  | 1.16966100  |
| C  | -0.08234300  | 3.08152600  | -1.63299400 |
| H  | -1.20866900  | 5.25137000  | -0.45338700 |
| H  | -3.51077600  | 3.18504300  | 2.52339700  |
| H  | -2.70664600  | 1.01180700  | 1.64471600  |
| O  | -0.32314000  | 2.52809900  | -2.69087400 |
| N  | -0.91914600  | 0.70644000  | -0.39880800 |
| Cl | -3.04130900  | 5.90661600  | 1.66920900  |
| C  | 2.10333300   | 3.88654700  | -2.53836100 |

|   |             |             |             |
|---|-------------|-------------|-------------|
| C | 3.37241300  | 4.44785400  | -2.40062200 |
| C | 3.81557600  | 4.88141100  | -1.14285300 |
| C | 2.98200400  | 4.75136300  | -0.02714200 |
| C | 1.70620000  | 4.19239800  | -0.16536800 |
| C | 1.25540800  | 3.75482400  | -1.42304700 |
| H | 1.73989200  | 3.54315800  | -3.50193600 |
| H | 4.01301400  | 4.56103700  | -3.27104800 |
| H | 4.80037600  | 5.32824900  | -1.03686100 |
| H | 3.31810000  | 5.09405700  | 0.94768200  |
| H | 1.06449900  | 4.09527000  | 0.70437200  |
| C | -2.23680700 | -3.26410600 | -0.27394300 |
| C | -2.74616100 | -4.55900000 | -0.34829500 |
| C | -1.01243900 | -2.95799900 | -0.89867600 |
| C | -2.04910200 | -5.55485300 | -1.03404300 |
| H | -3.69925900 | -4.78979700 | 0.12182400  |
| C | -0.32827100 | -3.96331100 | -1.61140000 |
| H | 5.39937400  | -0.46967400 | 0.97410800  |
| C | -0.84050500 | -5.25333000 | -1.67235600 |
| H | -2.45574200 | -6.56099800 | -1.08533000 |
| H | 0.61204300  | -3.72154900 | -2.09800900 |
| H | -0.30424300 | -6.02350500 | -2.21872000 |

**TS11-12**

|   |             |             |             |
|---|-------------|-------------|-------------|
| C | 0.01729400  | 0.44928300  | -0.39539700 |
| C | -1.26614100 | 0.07393800  | -0.99323800 |
| H | -1.20413900 | -0.91231500 | -1.44764700 |
| N | 0.27775400  | 1.81884600  | -0.14375300 |
| C | -0.88618300 | 2.73343800  | -0.29792600 |
| H | -0.51658500 | 3.76144100  | -0.26660500 |
| H | -1.46306800 | 2.57749800  | 0.62163400  |
| C | 2.77127400  | 5.43892000  | 1.36188900  |
| C | 2.51781400  | 4.17858600  | 0.82635800  |
| C | 2.00381400  | 4.11851600  | -0.46436100 |
| C | 1.74454100  | 5.24241600  | -1.23861200 |
| C | 2.01156400  | 6.49076100  | -0.67707300 |
| C | 2.52066600  | 6.60871500  | 0.62509300  |
| H | 3.17391300  | 5.51430400  | 2.36809900  |
| H | 2.71697800  | 3.27487000  | 1.39339500  |
| H | 1.35239500  | 5.13823600  | -2.24473900 |
| H | 1.82113400  | 7.38604700  | -1.26249400 |
| C | 2.77266100  | 7.96595800  | 1.23444400  |
| H | 1.89382700  | 8.30600200  | 1.79770200  |
| H | 3.61616900  | 7.94132400  | 1.93140400  |
| H | 2.98175400  | 8.71807000  | 0.46770200  |

|    |             |             |             |
|----|-------------|-------------|-------------|
| S  | 1.72345900  | 2.46677300  | -1.20084000 |
| O  | 1.29036200  | 2.60281800  | -2.68573400 |
| O  | 2.93215100  | 1.54408400  | -0.97011900 |
| Au | -2.74666000 | -0.59514800 | 0.59161400  |
| Br | -4.59423200 | -1.43084400 | 2.17177400  |
| Br | -3.56922000 | -2.28755800 | -1.12237800 |
| Br | 0.72996300  | -2.66827300 | -2.08164200 |
| Br | -1.98922900 | 0.95227000  | 2.50474000  |
| K  | 2.36315800  | -0.03360200 | -3.37791300 |
| C  | 1.93006500  | -0.44675000 | 0.84101900  |
| C  | 3.13654400  | -1.18500000 | 0.73951300  |
| C  | 4.01498900  | -1.21383200 | 1.83661900  |
| C  | 3.72245200  | -0.51995100 | 2.99984700  |
| C  | 2.52784400  | 0.17968800  | 3.12907100  |
| C  | 1.64210800  | 0.19985600  | 2.05858700  |
| C  | 3.66412700  | -1.86885400 | -0.49790800 |
| H  | 4.94106400  | -1.77212500 | 1.76365000  |
| H  | 2.27342700  | 0.67685600  | 4.05898900  |
| H  | 0.68477800  | 0.69063800  | 2.18181600  |
| O  | 3.76836000  | -1.25505700 | -1.55928900 |
| N  | 0.92724300  | -0.48522300 | -0.15832700 |
| Cl | 4.88850300  | -0.55327700 | 4.36286700  |
| C  | 5.04306900  | -3.75392400 | -1.35522600 |
| C  | 5.49081100  | -5.06944300 | -1.30770900 |
| C  | 5.03534200  | -5.92609100 | -0.29923700 |
| C  | 4.13613100  | -5.46112500 | 0.66237600  |
| C  | 3.69944000  | -4.13772100 | 0.62757800  |
| C  | 4.14972800  | -3.27192500 | -0.38299400 |
| H  | 5.37749100  | -3.07885900 | -2.13614400 |
| H  | 6.19026800  | -5.43259700 | -2.05543600 |
| H  | 5.37890700  | -6.95643100 | -0.26700500 |
| H  | 3.77050000  | -6.12890300 | 1.43671900  |
| H  | 2.99034400  | -3.78475400 | 1.36877600  |
| C  | -1.71905300 | 2.45751300  | -1.51614500 |
| C  | -2.29015900 | 3.46364300  | -2.29326900 |
| C  | -1.92356400 | 1.10438500  | -1.83589500 |
| C  | -3.07887600 | 3.13044100  | -3.39629500 |
| H  | -2.12227300 | 4.50725500  | -2.03592400 |
| C  | -2.70235000 | 0.77671900  | -2.95788300 |
| H  | 0.82209700  | -1.53906900 | -0.93291100 |
| C  | -3.27790800 | 1.78651800  | -3.72755200 |
| H  | -3.53098300 | 3.91448400  | -3.99717600 |
| H  | -2.86974400 | -0.26655300 | -3.20430500 |
| H  | -3.88708200 | 1.52306000  | -4.58759300 |

**IM12**

|    |             |             |             |
|----|-------------|-------------|-------------|
| C  | 0.19973600  | -0.41075100 | 0.49506300  |
| C  | -1.14068200 | -0.41449800 | 1.04021900  |
| H  | -1.44118400 | 0.58937300  | 1.34863000  |
| N  | 0.93691800  | -1.57821500 | 0.41593500  |
| C  | 0.20848500  | -2.83130100 | 0.75092500  |
| H  | 0.94692800  | -3.62389600 | 0.89856300  |
| H  | -0.33388900 | -3.07332200 | -0.17114500 |
| C  | 4.67334500  | -3.74918200 | -1.28207400 |
| C  | 3.95512100  | -2.71465400 | -0.69031600 |
| C  | 3.52303000  | -2.89749200 | 0.61928600  |
| C  | 3.77731700  | -4.04645300 | 1.35632900  |
| C  | 4.50079200  | -5.06638200 | 0.73638400  |
| C  | 4.95411100  | -4.93718800 | -0.58360600 |
| H  | 5.02228700  | -3.63214500 | -2.30448600 |
| H  | 3.73928300  | -1.79849300 | -1.23013700 |
| H  | 3.42479000  | -4.13477500 | 2.37846000  |
| H  | 4.71402200  | -5.97563100 | 1.29118000  |
| C  | 5.72334600  | -6.04835200 | -1.25454100 |
| H  | 5.16013200  | -6.45606800 | -2.10279300 |
| H  | 6.67986600  | -5.68481700 | -1.64748400 |
| H  | 5.93025300  | -6.86952800 | -0.56279000 |
| S  | 2.60592200  | -1.53781600 | 1.43594700  |
| O  | 2.33128800  | -1.90137400 | 2.90962400  |
| O  | 3.28134800  | -0.17571700 | 1.18435900  |
| Au | -2.64155900 | -0.55461300 | -0.68253000 |
| Br | -4.54162000 | -0.67174200 | -2.40136200 |
| Br | -4.11070500 | 0.98345800  | 0.70298300  |
| Br | -0.25948700 | 2.61522300  | 2.75957400  |
| Br | -1.25664800 | -1.99555200 | -2.31413600 |
| K  | 2.59340800  | 1.42346900  | 3.38023100  |
| C  | 1.68020400  | 1.03234500  | -0.92107500 |
| C  | 2.41284300  | 2.23704400  | -0.93564800 |
| C  | 3.24095100  | 2.51958100  | -2.03097600 |
| C  | 3.35719500  | 1.61301300  | -3.07538600 |
| C  | 2.62310300  | 0.43139400  | -3.08209800 |
| C  | 1.78039900  | 0.15275200  | -2.01071400 |
| C  | 2.46303000  | 3.24623000  | 0.19720700  |
| H  | 3.80130200  | 3.44791500  | -2.05452900 |
| H  | 2.67555600  | -0.24708600 | -3.92657500 |
| H  | 1.15515900  | -0.73137300 | -2.04454800 |
| O  | 3.02305800  | 2.93526300  | 1.24673300  |
| N  | 0.74134800  | 0.76544700  | 0.11217400  |

|    |             |             |             |
|----|-------------|-------------|-------------|
| Cl | 4.44708100  | 1.98737400  | -4.44770100 |
| C  | 2.16144800  | 5.59903900  | 0.92861800  |
| C  | 1.63903000  | 6.87524700  | 0.76340600  |
| C  | 0.85247600  | 7.16857500  | -0.35684000 |
| C  | 0.59392700  | 6.18397300  | -1.31251200 |
| C  | 1.12559400  | 4.90554600  | -1.15568600 |
| C  | 1.91486700  | 4.60193000  | -0.03257600 |
| H  | 2.75927300  | 5.34801600  | 1.79773400  |
| H  | 1.83180300  | 7.64154100  | 1.50848800  |
| H  | 0.43595800  | 8.16453100  | -0.47982700 |
| H  | -0.02619700 | 6.40864200  | -2.17501800 |
| H  | 0.91392700  | 4.14187900  | -1.89684800 |
| C  | -0.73151500 | -2.69759300 | 1.91465900  |
| C  | -0.93693200 | -3.71490900 | 2.84517000  |
| C  | -1.43916700 | -1.48772900 | 2.01578700  |
| C  | -1.86093400 | -3.53720700 | 3.87659300  |
| H  | -0.37978300 | -4.64544200 | 2.76364800  |
| C  | -2.35105000 | -1.30583600 | 3.06785600  |
| H  | 0.31696600  | 1.57658000  | 0.59913300  |
| C  | -2.56119600 | -2.33143200 | 3.98726500  |
| H  | -2.02751700 | -4.33304300 | 4.59706900  |
| H  | -2.88577300 | -0.36610200 | 3.15358700  |
| H  | -3.27042300 | -2.18726900 | 4.79712800  |

**3a**

|   |             |             |             |
|---|-------------|-------------|-------------|
| C | 0.35170700  | -0.39114700 | 0.35928000  |
| C | -1.02312900 | -0.81187400 | 0.21396900  |
| N | 1.34278300  | -1.32598400 | 0.70504500  |
| C | -1.27109100 | -2.26552300 | 0.03775900  |
| C | -0.30632800 | -3.16748700 | 0.53138200  |
| C | -0.44348500 | -4.54120400 | 0.32770800  |
| C | -1.53956700 | -5.04625800 | -0.36877000 |
| C | -2.48622200 | -4.16157200 | -0.88981400 |
| C | -2.35059600 | -2.78916200 | -0.69801800 |
| H | 0.32135700  | -5.21382600 | 0.70797600  |
| H | -1.64300700 | -6.11666500 | -0.52340400 |
| H | -3.32843800 | -4.53872400 | -1.46338900 |
| H | -3.07949000 | -2.12409800 | -1.14153500 |
| C | 0.87785100  | -2.59698900 | 1.26331100  |
| H | 0.63770200  | -2.38934100 | 2.31693300  |
| H | 1.72272500  | -3.29074600 | 1.25233000  |
| C | 4.93417500  | 1.82308600  | -0.63896400 |
| C | 3.93310700  | 0.89528500  | -0.92891200 |
| C | 3.94782000  | -0.31098700 | -0.24633200 |

|    |             |             |             |
|----|-------------|-------------|-------------|
| C  | 4.90868300  | -0.62977300 | 0.70460500  |
| C  | 5.89510100  | 0.31418500  | 0.98108400  |
| C  | 5.92170500  | 1.55165900  | 0.31801000  |
| H  | 4.94843500  | 2.77233700  | -1.16832800 |
| H  | 3.16551800  | 1.09313900  | -1.66781500 |
| H  | 4.89400300  | -1.59607800 | 1.19691700  |
| H  | 6.66002200  | 0.08343100  | 1.71846900  |
| C  | 6.99625500  | 2.56447000  | 0.63594000  |
| H  | 6.90912000  | 2.92190800  | 1.66965800  |
| H  | 7.99711700  | 2.12961800  | 0.52907100  |
| H  | 6.93479900  | 3.43478100  | -0.02412800 |
| S  | 2.66058800  | -1.56514200 | -0.64343700 |
| O  | 2.06183100  | -1.23304500 | -2.01801600 |
| O  | 3.25215500  | -2.95348600 | -0.33215800 |
| C  | -0.15217000 | 1.82533300  | 0.04832500  |
| C  | -1.55848100 | 1.56428300  | 0.09566000  |
| C  | -2.45325800 | 2.67047300  | 0.06653300  |
| C  | -1.95478400 | 3.94202600  | -0.06899300 |
| C  | -0.57339700 | 4.21200600  | -0.17055600 |
| C  | 0.30997600  | 3.16022600  | -0.10559800 |
| C  | -1.99011200 | 0.19784500  | 0.16363900  |
| H  | -3.52089500 | 2.51268900  | 0.14659900  |
| H  | -0.22904400 | 5.23432600  | -0.28052700 |
| H  | 1.38266500  | 3.31929300  | -0.14604900 |
| N  | 0.76982900  | 0.84870500  | 0.22014500  |
| Cl | -3.09622900 | 5.33359200  | -0.11307300 |
| C  | -4.01041700 | -0.70164600 | 1.34654900  |
| C  | -5.37866500 | -0.96240900 | 1.41572800  |
| C  | -6.21364100 | -0.62300100 | 0.34894000  |
| C  | -5.67284400 | -0.01406900 | -0.78534600 |
| C  | -4.30494400 | 0.25533500  | -0.85202900 |
| C  | -3.45482600 | -0.09204300 | 0.21103400  |
| H  | -3.36267800 | -0.97034400 | 2.17600300  |
| H  | -5.79254900 | -1.43157500 | 2.30415900  |
| H  | -7.27902600 | -0.82949000 | 0.40200300  |
| H  | -6.31477100 | 0.25304400  | -1.62039000 |
| H  | -3.88777300 | 0.72432800  | -1.73902300 |

Cartesian coordinates for the stationary points given in Fig. S1  
**TS3-4**

|   |             |             |             |
|---|-------------|-------------|-------------|
| C | 1.07587000  | 0.99265500  | 0.19689400  |
| C | 1.62453200  | -0.32122900 | -0.16586000 |
| H | 2.49030700  | -0.25109600 | -0.81926400 |
| N | -0.28638800 | 1.26255200  | 0.09321400  |



|    |             |             |             |
|----|-------------|-------------|-------------|
| C  | -2.55619200 | 2.22521600  | -1.47647800 |
| C  | -1.98104500 | 3.01717400  | -0.47643000 |
| C  | -2.64667800 | 4.17502600  | -0.05365300 |
| C  | -3.86877000 | 4.53513900  | -0.62155500 |
| C  | -4.44686900 | 3.73073700  | -1.60636900 |
| C  | -3.79110600 | 2.57296700  | -2.02827700 |
| H  | -2.04649600 | 1.32510100  | -1.80634700 |
| H  | -2.20908700 | 4.79482400  | 0.72650000  |
| H  | -4.37537900 | 5.43577000  | -0.28445000 |
| H  | -5.40917100 | 3.99589900  | -2.03476700 |
| H  | -4.25043500 | 1.92648900  | -2.76898300 |
| C  | -0.62210200 | 2.70399900  | 0.11329800  |
| H  | 0.15995900  | 3.18374400  | -0.48605600 |
| H  | -0.51809200 | 3.13236000  | 1.12047400  |
| C  | -4.92085000 | 1.75557800  | 2.14572900  |
| C  | -3.85240000 | 1.05043100  | 1.59941900  |
| C  | -2.61093100 | 1.21675900  | 2.20067700  |
| C  | -2.37747000 | 2.04678200  | 3.29388600  |
| C  | -3.46875600 | 2.74173500  | 3.81050000  |
| C  | -4.74906000 | 2.60828300  | 3.24797400  |
| H  | -5.89859400 | 1.62557300  | 1.68976000  |
| H  | -4.03158300 | 0.40293100  | 0.74303200  |
| H  | -1.39140000 | 2.12206500  | 3.73880300  |
| H  | -3.32331500 | 3.38980100  | 4.67041300  |
| C  | -5.92877000 | 3.35074300  | 3.82454600  |
| H  | -6.61072300 | 2.65836900  | 4.33411600  |
| H  | -5.61635200 | 4.10754100  | 4.55025900  |
| H  | -6.50603100 | 3.84607400  | 3.03615100  |
| S  | -1.18107100 | 0.25600600  | 1.56762700  |
| O  | -0.08989300 | 0.18250600  | 2.65208300  |
| O  | -1.67973900 | -1.03061500 | 0.88274100  |
| Au | 0.77909900  | -2.15559700 | -0.32600100 |
| Br | 1.74287900  | -3.08307200 | 1.82369300  |
| Br | -0.31626500 | -4.40649400 | -0.83802000 |
| Br | 0.08297800  | -1.16399100 | -2.59137100 |
| Br | -5.70990900 | -0.80508500 | -0.97577900 |
| K  | -3.07606900 | -2.47350700 | -1.00375000 |
| C  | 3.17068700  | 1.43383700  | 0.82135800  |
| C  | 4.37705900  | 2.14043300  | 0.55028700  |
| C  | 5.58209700  | 1.51023800  | 0.81184500  |
| C  | 5.62080600  | 0.18467100  | 1.30086600  |
| C  | 4.47166000  | -0.50993300 | 1.62036600  |
| C  | 3.23203100  | 0.13269600  | 1.43043700  |
| C  | 4.41180400  | 3.57252500  | 0.04618100  |

|    |            |             |             |
|----|------------|-------------|-------------|
| H  | 6.51109000 | 2.03618300  | 0.61876000  |
| H  | 4.50882600 | -1.49752600 | 2.06500700  |
| H  | 2.37751400 | -0.22366400 | 2.00465700  |
| O  | 5.08493400 | 4.37047700  | 0.68133300  |
| N  | 1.94589800 | 1.93750800  | 0.50638900  |
| Cl | 7.21211000 | -0.56122500 | 1.57451800  |
| C  | 3.43821900 | 5.32068400  | -1.41910600 |
| C  | 2.78977900 | 5.73033200  | -2.58007000 |
| C  | 2.39968900 | 4.78523500  | -3.53513800 |
| C  | 2.66140600 | 3.42824500  | -3.32824700 |
| C  | 3.29409300 | 3.01454700  | -2.15715200 |
| C  | 3.68166300 | 3.95605500  | -1.19022300 |
| H  | 3.76143400 | 6.03883200  | -0.67263500 |
| H  | 2.59052700 | 6.78506100  | -2.74611100 |
| H  | 1.89664200 | 5.10671300  | -4.44273800 |
| H  | 2.37560700 | 2.69577800  | -4.07747100 |
| H  | 3.51225600 | 1.96040700  | -2.01157800 |

#### IM4

|   |             |             |             |
|---|-------------|-------------|-------------|
| C | -0.97858800 | 0.23075800  | -0.73193100 |
| C | -0.28777800 | -0.55698400 | 0.34537700  |
| H | 0.14854300  | 0.07693600  | 1.11824500  |
| N | -0.47918200 | 1.16823200  | -1.50209200 |
| C | -3.43510300 | 2.70544300  | -2.13431800 |
| C | -2.08284800 | 2.89191300  | -2.45906300 |
| C | -1.59213300 | 4.19713800  | -2.61675200 |
| C | -2.43455000 | 5.29599600  | -2.43420100 |
| C | -3.77671000 | 5.10258100  | -2.10232700 |
| C | -4.27514400 | 3.80557700  | -1.95763500 |
| H | -3.82267500 | 1.69745800  | -2.02993200 |
| H | -0.55173000 | 4.35056100  | -2.88734800 |
| H | -2.04239900 | 6.30105800  | -2.56292100 |
| H | -4.43364100 | 5.95765400  | -1.96748600 |
| H | -5.32279000 | 3.64823700  | -1.71552100 |
| C | -1.17936600 | 1.69572600  | -2.70101000 |
| H | -1.73775900 | 0.85057300  | -3.10996100 |
| H | -0.38702300 | 1.95631300  | -3.40762400 |
| C | 2.22098900  | 3.58045300  | 2.37240400  |
| C | 2.31697600  | 2.84565500  | 1.19053600  |
| C | 1.19855300  | 2.82769600  | 0.36864400  |
| C | 0.01784100  | 3.51491900  | 0.63645100  |
| C | -0.04367800 | 4.22612100  | 1.83255300  |
| C | 1.04817900  | 4.26615700  | 2.71745400  |
| H | 3.09763700  | 3.62036700  | 3.01319500  |

|              |             |             |             |
|--------------|-------------|-------------|-------------|
| H            | 3.26697700  | 2.37165700  | 0.93961500  |
| H            | -0.81925500 | 3.51084800  | -0.05287100 |
| H            | -0.95300300 | 4.76994200  | 2.07330800  |
| C            | 0.96141300  | 5.02800800  | 4.01675800  |
| H            | 0.75954600  | 4.34621300  | 4.85309500  |
| H            | 1.90355100  | 5.53963400  | 4.23782800  |
| H            | 0.16036600  | 5.77312200  | 3.99535900  |
| S            | 1.37384900  | 1.94630800  | -1.24650800 |
| O            | 1.42541100  | 2.86786400  | -2.46018400 |
| O            | 2.38207100  | 0.79713100  | -1.13311200 |
| Au           | 1.33165300  | -1.77586100 | -0.31651100 |
| Br           | 0.00687700  | -2.36557800 | -2.40409700 |
| Br           | 3.31742100  | -3.22045200 | -1.09000700 |
| Br           | 2.43224500  | -1.34136000 | 1.95053200  |
| Br           | 5.84150200  | 2.36954000  | 0.88500600  |
| K            | 4.92964000  | -0.33656700 | -0.36351800 |
| C            | -2.62313800 | -0.90037000 | 0.12097100  |
| C            | -3.95615100 | -1.25059100 | 0.55716300  |
| C            | -4.06573500 | -1.72542300 | 1.83781100  |
| C            | -2.92529100 | -1.89719200 | 2.71525800  |
| C            | -1.65397500 | -1.73287600 | 2.30214300  |
| C            | -1.43644300 | -1.45297100 | 0.84971100  |
| C            | -5.13083700 | -1.09769500 | -0.37827700 |
| H            | -5.04476900 | -1.96548700 | 2.23949600  |
| H            | -0.79900700 | -1.90794800 | 2.94762000  |
| H            | -1.30486100 | -2.45765900 | 0.39121300  |
| O            | -4.96726600 | -1.37324300 | -1.55772300 |
| N            | -2.32825700 | -0.05832600 | -0.83852300 |
| Cl           | -3.29204600 | -2.36348000 | 4.40518200  |
| C            | -7.59461500 | -0.98660000 | -0.61563000 |
| C            | -8.85842400 | -0.57979500 | -0.20096400 |
| C            | -9.00204800 | 0.17620900  | 0.96755700  |
| C            | -7.87771300 | 0.52542500  | 1.71818000  |
| C            | -6.61027500 | 0.10642500  | 1.31303600  |
| C            | -6.45851900 | -0.65971200 | 0.14529000  |
| H            | -7.46058200 | -1.56160500 | -1.52597800 |
| H            | -9.73293600 | -0.84724200 | -0.78702900 |
| H            | -9.98920900 | 0.49670500  | 1.28885500  |
| H            | -7.98622000 | 1.12610100  | 2.61660300  |
| H            | -5.73995200 | 0.40211800  | 1.89060700  |
| <b>TS5-6</b> |             |             |             |
| C            | -1.13255300 | 0.72405000  | -1.11499100 |
| C            | -1.49095800 | -0.65350900 | -0.67396000 |

|    |             |             |             |
|----|-------------|-------------|-------------|
| H  | -2.54679300 | -0.86914400 | -0.72267700 |
| N  | 0.13975200  | 1.23688200  | -0.85789900 |
| C  | 1.48173800  | 2.56926500  | 1.36510100  |
| C  | 1.26175800  | 3.23007400  | 0.15032000  |
| C  | 1.92020800  | 4.44090900  | -0.09844000 |
| C  | 2.78980600  | 4.98137200  | 0.84877800  |
| C  | 3.02123500  | 4.30865400  | 2.05077500  |
| C  | 2.36734100  | 3.10162500  | 2.30455100  |
| H  | 0.97572400  | 1.63014400  | 1.56866000  |
| H  | 1.76006100  | 4.95841600  | -1.04216600 |
| H  | 3.29721800  | 5.91996900  | 0.64162400  |
| H  | 3.71471100  | 4.71551800  | 2.78107100  |
| H  | 2.55718300  | 2.56449800  | 3.22885500  |
| C  | 0.27285100  | 2.71000500  | -0.87345600 |
| H  | -0.72863700 | 3.09240700  | -0.65637000 |
| H  | 0.51049000  | 3.08375000  | -1.87837200 |
| C  | 5.05396100  | 2.37494600  | -1.16661100 |
| C  | 3.95222100  | 1.54342900  | -0.98633400 |
| C  | 2.99027900  | 1.53181100  | -1.98718100 |
| C  | 3.06607500  | 2.30077600  | -3.14457300 |
| C  | 4.17609900  | 3.13109600  | -3.28917000 |
| C  | 5.17965500  | 3.18229100  | -2.30808200 |
| H  | 5.81878000  | 2.36962100  | -0.39450200 |
| H  | 3.90139400  | 0.93558600  | -0.08786000 |
| H  | 2.30476500  | 2.22757700  | -3.91334900 |
| H  | 4.26896800  | 3.73702400  | -4.18645400 |
| C  | 6.37971100  | 4.08214300  | -2.47139700 |
| H  | 6.41076900  | 4.83812900  | -1.67738000 |
| H  | 7.31130600  | 3.50872500  | -2.40227400 |
| H  | 6.36890400  | 4.60157900  | -3.43417400 |
| S  | 1.56729900  | 0.37043100  | -1.86235400 |
| O  | 0.99127000  | 0.15824000  | -3.26748100 |
| O  | 1.97104800  | -0.83993200 | -0.98826600 |
| Au | -0.34847900 | -2.17098700 | 0.04508100  |
| Br | -1.14847700 | -2.31670400 | -2.42108900 |
| Br | 0.92417100  | -4.36077400 | 0.36239600  |
| Br | 0.07890100  | -1.44121200 | 2.41789100  |
| Br | 5.54628300  | -0.04171700 | 1.88365900  |
| K  | 3.35818200  | -2.11729800 | 1.09292500  |
| C  | -3.41485300 | 1.27323300  | -1.56015100 |
| C  | -4.15206000 | 1.11665600  | -0.35216500 |
| C  | -5.55345900 | 1.00055700  | -0.41619300 |
| C  | -6.20123700 | 1.01493500  | -1.64085800 |
| C  | -5.49405900 | 1.19646800  | -2.83013100 |

|    |             |            |             |
|----|-------------|------------|-------------|
| C  | -4.11525800 | 1.35175700 | -2.77899000 |
| C  | -3.48101000 | 1.07680100 | 0.98125200  |
| H  | -6.12501200 | 0.87112100 | 0.49528000  |
| H  | -6.01832300 | 1.22423300 | -3.77911100 |
| H  | -3.54622100 | 1.52040800 | -3.68736600 |
| O  | -2.40328500 | 0.48204200 | 1.14010700  |
| N  | -2.04287800 | 1.50053800 | -1.60615200 |
| Cl | -7.97990300 | 0.81367700 | -1.69597500 |
| C  | -3.72782000 | 1.31359100 | 3.43831000  |
| C  | -4.24088300 | 1.94350500 | 4.56700300  |
| C  | -5.10558700 | 3.03450800 | 4.42800500  |
| C  | -5.45784600 | 3.49399500 | 3.15692500  |
| C  | -4.96040200 | 2.85661200 | 2.02167500  |
| C  | -4.09449000 | 1.75611500 | 2.15327600  |
| H  | -3.04666300 | 0.47386500 | 3.52931100  |
| H  | -3.96546200 | 1.58890500 | 5.55580300  |
| H  | -5.50066700 | 3.52893700 | 5.31110100  |
| H  | -6.11684900 | 4.35043800 | 3.04903900  |
| H  | -5.22353900 | 3.22902400 | 1.03728400  |

**IM6**

|   |             |            |             |
|---|-------------|------------|-------------|
| C | -0.88141400 | 1.50176900 | -0.19351900 |
| C | -1.60126900 | 0.16817500 | -0.41049200 |
| H | -2.28096000 | 0.28011900 | -1.25579500 |
| N | 0.43241600  | 1.59043900 | 0.17933900  |
| C | 2.34447600  | 1.64653900 | 2.37862900  |
| C | 2.08395700  | 2.79599200 | 1.62413000  |
| C | 2.91003100  | 3.91710800 | 1.77636700  |
| C | 3.98303600  | 3.88932400 | 2.66670000  |
| C | 4.25082100  | 2.73327300 | 3.40372000  |
| C | 3.43216000  | 1.61288100 | 3.25455800  |
| H | 1.70979300  | 0.77285300 | 2.26482500  |
| H | 2.71789300  | 4.81320500 | 1.18923900  |
| H | 4.61834000  | 4.76479200 | 2.77372700  |
| H | 5.10023200  | 2.69912800 | 4.07977900  |
| H | 3.65085500  | 0.70341200 | 3.80525700  |
| C | 0.88968600  | 2.89463600 | 0.69673100  |
| H | 0.03219700  | 3.30536000 | 1.24007900  |
| H | 1.08388300  | 3.60445100 | -0.11908100 |
| C | 5.41891100  | 2.23582900 | -0.74916200 |
| C | 4.25128900  | 1.48495000 | -0.64361100 |
| C | 3.14476800  | 1.93175800 | -1.35459700 |
| C | 3.13660700  | 3.07579600 | -2.14769400 |
| C | 4.31929500  | 3.80845700 | -2.22195900 |

|    |             |             |             |
|----|-------------|-------------|-------------|
| C  | 5.47081500  | 3.40345200  | -1.52664100 |
| H  | 6.29486600  | 1.88421900  | -0.21062800 |
| H  | 4.25952000  | 0.58374900  | -0.03324300 |
| H  | 2.25314300  | 3.36090100  | -2.70845300 |
| H  | 4.35053400  | 4.70083500  | -2.84120900 |
| C  | 6.75047500  | 4.19741500  | -1.61888500 |
| H  | 7.09592600  | 4.50131400  | -0.62377700 |
| H  | 7.55133400  | 3.59538800  | -2.06478200 |
| H  | 6.62542900  | 5.09815800  | -2.22705000 |
| S  | 1.60557200  | 0.92677400  | -1.33003500 |
| O  | 0.75760100  | 1.25228500  | -2.56517400 |
| O  | 1.95263300  | -0.52775200 | -0.97989700 |
| Au | -0.70255500 | -1.71600700 | -0.64052500 |
| Br | -1.69558600 | -1.75813100 | -2.97435400 |
| Br | 0.27216100  | -4.07460800 | -0.99317000 |
| Br | 0.01630400  | -1.77519000 | 1.82803400  |
| Br | 5.71268400  | -1.29907700 | 1.21627500  |
| K  | 3.04064100  | -2.68541000 | 0.34552800  |
| C  | -2.96923900 | 2.62013400  | -0.46893800 |
| C  | -3.95114900 | 1.73360300  | 0.09285800  |
| C  | -5.33300100 | 1.96488600  | -0.15414900 |
| C  | -5.72380700 | 3.01930900  | -0.94399700 |
| C  | -4.78023700 | 3.91069000  | -1.48640900 |
| C  | -3.43798200 | 3.71990000  | -1.23039000 |
| C  | -3.56257600 | 0.64830000  | 0.95198000  |
| H  | -6.07136900 | 1.27724800  | 0.23880000  |
| H  | -5.11373100 | 4.74167800  | -2.09860900 |
| H  | -2.69455000 | 4.40354100  | -1.62522900 |
| O  | -2.41922000 | 0.03856000  | 0.80039700  |
| N  | -1.61275100 | 2.57922600  | -0.27430200 |
| Cl | -7.45709900 | 3.26851000  | -1.29566400 |
| C  | -4.12243100 | -1.18816000 | 2.51020900  |
| C  | -4.83266000 | -1.68681600 | 3.59518900  |
| C  | -5.75070500 | -0.87243400 | 4.26717900  |
| C  | -5.95701300 | 0.44916800  | 3.85756200  |
| C  | -5.25987900 | 0.95670900  | 2.76757100  |
| C  | -4.34221800 | 0.13823900  | 2.07242700  |
| H  | -3.40199300 | -1.81138500 | 1.99218800  |
| H  | -4.66909300 | -2.70971300 | 3.91924800  |
| H  | -6.30012300 | -1.26556400 | 5.11777400  |
| H  | -6.65211600 | 1.08550300  | 4.39634600  |
| H  | -5.39378500 | 1.99259000  | 2.47632700  |

Cartesian coordinates for the stationary points given in Fig. S3

**It**

|   |             |             |             |
|---|-------------|-------------|-------------|
| C | 0.73718700  | 1.54379100  | -0.58379400 |
| C | 0.81343200  | 2.69643200  | -0.95639900 |
| H | 0.81187000  | 3.66484100  | -1.40047600 |
| N | 0.69544200  | 0.27550800  | -0.15287300 |
| C | -2.59834300 | 0.75343900  | 0.96767300  |
| C | -1.64676300 | -0.14611200 | 0.47854700  |
| C | -2.03725300 | -1.11367700 | -0.45720500 |
| C | -3.35987400 | -1.18066100 | -0.89004300 |
| C | -4.30858800 | -0.28209600 | -0.39149100 |
| C | -3.92617400 | 0.68477100  | 0.53809300  |
| H | -2.30043000 | 1.51127400  | 1.68866700  |
| H | -1.29722700 | -1.80717500 | -0.84798200 |
| H | -3.65298600 | -1.93529500 | -1.61490200 |
| H | -5.34018800 | -0.33664600 | -0.72875400 |
| H | -4.65707300 | 1.38852700  | 0.92725200  |
| C | -0.21322500 | -0.08618900 | 0.96079500  |
| H | -0.11731300 | 0.62953900  | 1.78836900  |
| H | 0.12053100  | -1.06894700 | 1.30696500  |
| C | 3.41678600  | 0.60831700  | 1.00524800  |
| H | 3.01280500  | 0.52765300  | 2.01357700  |
| H | 4.43863800  | 0.23481500  | 0.93925600  |
| H | 3.31356800  | 1.60751700  | 0.58357800  |
| S | 2.39883800  | -0.53480800 | -0.07235400 |
| O | 2.96641200  | -0.47964100 | -1.48645700 |
| O | 2.17798600  | -1.85233700 | 0.67941600  |

**IMI'**

|   |             |             |             |
|---|-------------|-------------|-------------|
| C | 1.18274500  | -0.53175000 | -1.57264200 |
| C | -0.06594400 | -0.80652900 | -1.75614500 |
| H | -0.46335700 | -1.25933600 | -2.65874800 |
| N | 2.36316000  | -0.28709500 | -1.25385400 |
| C | 1.95462600  | 2.52432600  | 0.20370900  |
| C | 3.10796100  | 1.80528700  | -0.14443900 |
| C | 4.22856100  | 1.84464100  | 0.69684400  |
| C | 4.19453000  | 2.59455100  | 1.87522400  |
| C | 3.04200500  | 3.30342300  | 2.22034700  |
| C | 1.92286600  | 3.26816400  | 1.38351700  |
| H | 1.08039700  | 2.50690400  | -0.44335000 |
| H | 5.12426400  | 1.29093100  | 0.42757300  |
| H | 5.06912400  | 2.62721400  | 2.51889800  |
| H | 3.01606100  | 3.88570400  | 3.13704400  |

|    |             |             |             |
|----|-------------|-------------|-------------|
| H  | 1.02541700  | 3.82113300  | 1.64447200  |
| C  | 3.13511400  | 0.97968800  | -1.41025700 |
| H  | 2.68135300  | 1.50186800  | -2.25767800 |
| H  | 4.15308700  | 0.68640500  | -1.67778300 |
| C  | 2.85364100  | -1.71717100 | 1.42210900  |
| H  | 3.39945500  | -2.49796900 | 1.95477300  |
| H  | 3.12350800  | -0.71224800 | 1.74578700  |
| H  | 1.77656400  | -1.89939600 | 1.39331700  |
| S  | 3.43670500  | -1.84055300 | -0.35211900 |
| O  | 4.88346300  | -1.36838800 | -0.49515700 |
| O  | 2.89452800  | -3.09447800 | -1.02183200 |
| Au | -1.42716400 | -0.24611600 | -0.28972700 |
| Br | -0.94548100 | -2.42416300 | 0.93785600  |
| Br | -3.10964100 | 0.46188500  | 1.44845800  |
| Br | -1.78287500 | 1.87843900  | -1.63941900 |

**TS1'-2'**

|    |             |             |             |
|----|-------------|-------------|-------------|
| C  | 1.22748400  | 0.35263200  | -0.26418700 |
| C  | 0.73910600  | -0.86790200 | -0.30195100 |
| H  | 1.34661400  | -1.72790000 | -0.55517100 |
| N  | 0.95682700  | 1.59564800  | -0.01971400 |
| C  | -1.60773300 | 2.94302900  | -1.30595900 |
| C  | -0.37751900 | 3.49633800  | -0.91862600 |
| C  | -0.33815200 | 4.80782500  | -0.42771800 |
| C  | -1.51389500 | 5.55626000  | -0.32250600 |
| C  | -2.73518200 | 4.99839000  | -0.70413300 |
| C  | -2.78025400 | 3.69052700  | -1.19616700 |
| H  | -1.65005600 | 1.92844300  | -1.69450200 |
| H  | 0.61077200  | 5.23680200  | -0.11858300 |
| H  | -1.47270700 | 6.57359900  | 0.05712400  |
| H  | -3.64927300 | 5.57998800  | -0.62133100 |
| H  | -3.72630200 | 3.25087400  | -1.49862500 |
| C  | 0.89198200  | 2.67950600  | -1.03346200 |
| H  | 0.95093700  | 2.17174700  | -2.00048200 |
| H  | 1.77930500  | 3.30974700  | -0.91854400 |
| C  | -0.13925900 | 2.38940100  | 2.63334600  |
| H  | 0.09618300  | 2.77112400  | 3.62796600  |
| H  | -0.72619400 | 3.08927000  | 2.03976100  |
| H  | -0.55328400 | 1.37982000  | 2.65764300  |
| S  | 1.50021000  | 2.23989100  | 1.76399300  |
| O  | 2.11381300  | 3.62393800  | 1.52214000  |
| O  | 2.31397600  | 1.10080000  | 2.38381800  |
| Au | -1.26358100 | -1.23235000 | -0.00360600 |
| Br | -0.80689700 | -1.47384300 | 2.48599600  |



|    |             |             |             |
|----|-------------|-------------|-------------|
| Br | -3.74172200 | -1.67645400 | 0.30119900  |
| Br | -1.49314400 | -1.03362300 | -2.53261500 |
| C  | 4.14458200  | -0.52131700 | -0.38322200 |
| C  | 4.94099700  | -1.02507800 | -1.46979400 |
| C  | 6.11919700  | -1.78355900 | -1.21315200 |
| C  | 6.44656200  | -2.01630900 | 0.09631000  |
| C  | 5.64288100  | -1.51135000 | 1.17287600  |
| C  | 4.50575200  | -0.76969500 | 0.96901000  |
| C  | 4.26931900  | -0.59301100 | -2.59295900 |
| H  | 6.72687600  | -2.15968900 | -2.02965400 |
| H  | 5.95472200  | -1.72538300 | 2.19100900  |
| H  | 3.90451600  | -0.36930100 | 1.77675600  |
| O  | 3.18373300  | 0.09851400  | -2.24643000 |
| N  | 3.10134100  | 0.17402400  | -0.85831900 |
| H  | 7.33429500  | -2.59283600 | 0.33696300  |
| H  | 4.44027300  | -0.68952800 | -3.65587900 |

**IM2'**

|    |             |             |             |
|----|-------------|-------------|-------------|
| C  | 1.34063700  | 0.44878200  | -0.00669800 |
| C  | 0.49108500  | -0.22475300 | -0.80633500 |
| H  | 0.86539900  | -0.55175600 | -1.77499800 |
| N  | 1.05405600  | 0.99623700  | 1.25251000  |
| C  | 0.53224600  | 4.25349300  | -0.07048000 |
| C  | 0.24077600  | 3.33006700  | 0.93824700  |
| C  | -1.05427000 | 3.29334400  | 1.47140600  |
| C  | -2.03600800 | 4.16487500  | 1.00628400  |
| C  | -1.73466600 | 5.08895300  | 0.00171300  |
| C  | -0.44897900 | 5.13142500  | -0.53735100 |
| H  | 1.53595000  | 4.29379300  | -0.48793600 |
| H  | -1.29562400 | 2.57348600  | 2.24928300  |
| H  | -3.03757100 | 4.12152100  | 1.42422800  |
| H  | -2.50071500 | 5.76956600  | -0.35928200 |
| H  | -0.20741900 | 5.84657600  | -1.31914300 |
| C  | 1.33012800  | 2.43663900  | 1.49260500  |
| H  | 2.30580100  | 2.73557500  | 1.09170800  |
| H  | 1.40103600  | 2.55221600  | 2.57771900  |
| C  | 0.36277600  | -0.83725400 | 3.46061500  |
| H  | 0.75487700  | -1.38214200 | 4.32044000  |
| H  | -0.29344400 | -0.01955800 | 3.75515700  |
| H  | -0.08139900 | -1.49560900 | 2.71430600  |
| S  | 1.84719400  | -0.04637800 | 2.67211200  |
| O  | 2.45681000  | 0.93943400  | 3.68483800  |
| O  | 2.72764500  | -1.12485500 | 2.01029200  |
| Au | -1.42375000 | -0.78456600 | -0.43753000 |

|    |             |             |             |
|----|-------------|-------------|-------------|
| Br | -0.46591100 | -2.98562700 | 0.46187100  |
| Br | -3.81702300 | -1.46011900 | 0.07661000  |
| Br | -2.12270100 | 1.27814800  | -1.72874700 |
| C  | 3.60711700  | -0.39506100 | -0.86751700 |
| C  | 4.70056300  | 0.25798200  | -1.52602100 |
| C  | 5.80886600  | -0.49692300 | -2.00703300 |
| C  | 5.76830000  | -1.85367900 | -1.82651800 |
| C  | 4.66008700  | -2.48978300 | -1.17553800 |
| C  | 3.57680700  | -1.79719000 | -0.68766600 |
| C  | 4.35646900  | 1.59280700  | -1.52981100 |
| H  | 6.64148700  | -0.00614200 | -2.49929300 |
| H  | 4.68162500  | -3.56918300 | -1.05977600 |
| H  | 2.74956600  | -2.27456500 | -0.17751300 |
| O  | 3.17112600  | 1.78654800  | -0.95806300 |
| N  | 2.70416400  | 0.53876200  | -0.50945500 |
| H  | 6.58748400  | -2.47122200 | -2.18033800 |
| H  | 4.84759700  | 2.48977800  | -1.88152100 |

**TS2'-3'**

|   |             |             |             |
|---|-------------|-------------|-------------|
| C | 1.41735100  | 0.38681600  | 0.19245900  |
| C | 0.59859000  | -0.27996800 | -0.68316000 |
| H | 1.03999800  | -0.58232600 | -1.63188400 |
| N | 0.97496900  | 0.91082000  | 1.43189300  |
| C | 0.33868000  | 4.18489000  | 0.13723100  |
| C | 0.07211600  | 3.20354800  | 1.09696100  |
| C | -1.23830100 | 3.05519700  | 1.57098800  |
| C | -2.26065100 | 3.87236500  | 1.09399700  |
| C | -1.98472700 | 4.85516200  | 0.13901600  |
| C | -0.68340500 | 5.01051800  | -0.33816700 |
| H | 1.35205800  | 4.30640600  | -0.23804100 |
| H | -1.45989700 | 2.28968800  | 2.31022200  |
| H | -3.27347200 | 3.74040800  | 1.46370900  |
| H | -2.78240900 | 5.49260700  | -0.23222500 |
| H | -0.46148000 | 5.77153800  | -1.08164100 |
| C | 1.20005000  | 2.36309200  | 1.65906000  |
| H | 2.16232700  | 2.68596500  | 1.24534000  |
| H | 1.27302700  | 2.49766400  | 2.74249200  |
| C | 0.33228800  | -0.83677300 | 3.69779800  |
| H | -0.14339000 | -1.48827100 | 2.96518800  |
| H | 0.73221600  | -1.38436300 | 4.55212500  |
| H | -0.29997900 | -0.00422100 | 4.00319700  |
| S | 1.81086600  | -0.08169400 | 2.86588700  |
| O | 2.45001300  | 0.91901900  | 3.84462300  |
| O | 2.66116400  | -1.19092300 | 2.21430300  |

|    |             |             |             |
|----|-------------|-------------|-------------|
| Au | -1.33839100 | -0.78912300 | -0.46370200 |
| Br | -0.58874900 | -2.94628100 | 0.67598200  |
| Br | -3.80074500 | -1.31582100 | -0.20807600 |
| Br | -1.70991800 | 1.22606200  | -1.96615300 |
| C  | 3.57770500  | -0.31809400 | -0.80627100 |
| C  | 4.44785400  | 0.33434500  | -1.72426300 |
| C  | 5.44890700  | -0.37824900 | -2.42357400 |
| C  | 5.54421900  | -1.73528800 | -2.20836500 |
| C  | 4.66393100  | -2.38220900 | -1.30118600 |
| C  | 3.68359300  | -1.70738300 | -0.59359300 |
| C  | 4.09576900  | 1.69357800  | -1.72832500 |
| H  | 6.10462300  | 0.13585900  | -3.11933400 |
| H  | 4.76205100  | -3.45365300 | -1.15232600 |
| H  | 3.03915800  | -2.19560800 | 0.12670500  |
| O  | 3.09884100  | 2.00125300  | -0.99612300 |
| N  | 2.75260000  | 0.53926300  | -0.13713800 |
| H  | 6.28941200  | -2.32116000 | -2.73600800 |
| H  | 4.60725800  | 2.50396900  | -2.24991900 |

**IM3'**

|   |             |             |             |
|---|-------------|-------------|-------------|
| C | -0.09011600 | 1.01590400  | 0.51749200  |
| C | 0.38416600  | 0.28883600  | -0.70698000 |
| H | 1.30236400  | 0.70589200  | -1.10572700 |
| N | -1.21028200 | 0.48791400  | 1.24265700  |
| C | -3.61414800 | 2.53069900  | -0.38050400 |
| C | -3.35671600 | 1.41335400  | 0.42144600  |
| C | -4.10808500 | 0.24570000  | 0.22732900  |
| C | -5.09788600 | 0.19378900  | -0.75201000 |
| C | -5.35235100 | 1.31421400  | -1.54953500 |
| C | -4.61011400 | 2.48047200  | -1.36070200 |
| H | -3.02394300 | 3.43237000  | -0.25142800 |
| H | -3.90785700 | -0.63189500 | 0.83664700  |
| H | -5.67156300 | -0.71831800 | -0.89260900 |
| H | -6.12621100 | 1.27588800  | -2.31163500 |
| H | -4.80205800 | 3.35514600  | -1.97651100 |
| C | -2.30051500 | 1.47820600  | 1.50584800  |
| H | -1.88632400 | 2.48521500  | 1.60023600  |
| H | -2.74040600 | 1.22105700  | 2.47524700  |
| C | -1.67258600 | -1.51195400 | 3.30478700  |
| H | -1.66680400 | -2.19100700 | 2.45310000  |
| H | -1.26688200 | -1.96433800 | 4.21062400  |
| H | -2.64407300 | -1.05339300 | 3.48459000  |
| S | -0.49529500 | -0.13374300 | 2.89626900  |
| O | -0.60459400 | 0.93260000  | 3.99380300  |

|    |             |             |             |
|----|-------------|-------------|-------------|
| O  | 0.87872200  | -0.72616900 | 2.50743400  |
| Au | 0.85503800  | -1.74646800 | -0.33101500 |
| Br | 3.28519600  | -1.29307400 | -0.77068500 |
| Br | -1.19527100 | -3.17081500 | -0.05850200 |
| Br | -0.91608200 | 0.28022100  | -2.16797700 |
| C  | 1.61263800  | 2.72877900  | 0.47041100  |
| C  | 1.60697400  | 4.02120900  | -0.11610000 |
| C  | 2.82840800  | 4.65661700  | -0.38168500 |
| C  | 4.04096100  | 4.05113000  | -0.06728400 |
| C  | 4.03628800  | 2.78829200  | 0.53330000  |
| C  | 2.83870500  | 2.12809100  | 0.80218900  |
| C  | 0.35770400  | 4.71912500  | -0.45615400 |
| H  | 2.81174200  | 5.64101100  | -0.84398500 |
| H  | 4.97304400  | 2.30542800  | 0.79607600  |
| H  | 2.83579500  | 1.16086000  | 1.29320400  |
| O  | -0.76385100 | 4.25209400  | -0.35596100 |
| N  | 0.42778300  | 2.12344000  | 0.87362500  |
| H  | 4.97830400  | 4.55503500  | -0.28066700 |
| H  | 0.50241000  | 5.75785100  | -0.82379500 |

**TS3'-7'**

|    |             |             |             |
|----|-------------|-------------|-------------|
| C  | -1.72719500 | 0.31238800  | 0.09311900  |
| C  | -0.73814400 | -0.79232800 | 0.14971200  |
| H  | -1.07674800 | -1.63607300 | 0.74089100  |
| N  | -3.06794200 | -0.15054300 | 0.31620300  |
| C  | -1.40220200 | -1.74071700 | -1.67208000 |
| C  | -2.74061500 | -1.93942800 | -1.20522500 |
| C  | -3.15276500 | -3.21649300 | -0.83366100 |
| C  | -2.28344000 | -4.30498900 | -0.95532500 |
| C  | -0.97870100 | -4.13407500 | -1.44329600 |
| C  | -0.54922700 | -2.87233100 | -1.81907600 |
| H  | -1.15659700 | -0.83058700 | -2.21907400 |
| H  | -4.15513100 | -3.36689700 | -0.44291100 |
| H  | -2.62459200 | -5.29527400 | -0.66583100 |
| H  | -0.31783900 | -4.98951700 | -1.54177400 |
| H  | 0.44534600  | -2.71934000 | -2.22194400 |
| C  | -3.61356600 | -0.73692400 | -0.94317200 |
| H  | -3.58469300 | -0.00733500 | -1.76037800 |
| H  | -4.64956400 | -1.04059100 | -0.77449200 |
| S  | -4.20296200 | 1.20487000  | 0.98297700  |
| O  | -5.08126700 | 1.74128200  | -0.15416700 |
| O  | -3.38849700 | 2.11276600  | 1.90730400  |
| Au | 1.29951300  | -0.49871300 | 0.29236900  |
| Br | 1.87475300  | -0.34258100 | -2.17856800 |

|    |             |             |             |
|----|-------------|-------------|-------------|
| Br | 3.74813100  | -0.18815700 | 0.87193400  |
| Br | 0.67335900  | -0.69208200 | 2.76495200  |
| C  | -0.39937000 | 2.27017200  | -0.38188400 |
| C  | -0.05077900 | 2.79790800  | -1.65287000 |
| C  | 1.01663800  | 3.70012700  | -1.75287700 |
| C  | 1.74179000  | 4.08292600  | -0.62868400 |
| C  | 1.38965300  | 3.56163000  | 0.61921300  |
| C  | 0.32644900  | 2.66750700  | 0.75195000  |
| C  | -0.75040700 | 2.36778800  | -2.86601700 |
| H  | 1.28428200  | 4.08371400  | -2.73462300 |
| H  | 1.94727200  | 3.84812400  | 1.50601500  |
| H  | 0.02865400  | 2.29938700  | 1.72732400  |
| O  | -1.56791000 | 1.45912800  | -2.93172400 |
| N  | -1.56267800 | 1.52737300  | -0.25167600 |
| C  | -5.25481900 | 0.12158700  | 2.07592800  |
| H  | -5.75003100 | -0.61168800 | 1.44112900  |
| H  | -4.57847400 | -0.33094800 | 2.79874800  |
| H  | -5.97125400 | 0.79671700  | 2.54482700  |
| H  | -0.48206800 | 2.93536200  | -3.78096800 |
| H  | 2.57471800  | 4.77236900  | -0.72037400 |

**TS3'-4'**

|    |             |             |             |
|----|-------------|-------------|-------------|
| C  | 1.23073000  | 1.13899200  | 0.25514100  |
| C  | 1.40966600  | -0.14440100 | -0.39973500 |
| H  | 2.33947600  | -0.27898500 | -0.94626400 |
| N  | -0.02575700 | 1.73284600  | 0.23734600  |
| C  | -2.70810700 | 1.60749300  | -1.48515200 |
| C  | -1.91077300 | 2.70328500  | -1.12120400 |
| C  | -2.51313300 | 3.95512200  | -0.93887100 |
| C  | -3.89155800 | 4.10803300  | -1.11066600 |
| C  | -4.67877700 | 3.01097800  | -1.46484800 |
| C  | -4.08416900 | 1.75955700  | -1.65254200 |
| H  | -2.25568700 | 0.63270000  | -1.64296700 |
| H  | -1.90332200 | 4.80482600  | -0.64568800 |
| H  | -4.34699700 | 5.08387500  | -0.96622200 |
| H  | -5.75054900 | 3.12987200  | -1.59850900 |
| H  | -4.68718300 | 0.90195600  | -1.93700000 |
| C  | -0.41591500 | 2.54631800  | -0.95334900 |
| H  | 0.00844800  | 2.01741100  | -1.81365200 |
| H  | 0.07057700  | 3.52697000  | -0.88338600 |
| S  | -0.41173300 | 2.60621100  | 1.88908200  |
| O  | -0.42881800 | 4.12035200  | 1.65329500  |
| O  | 0.50448200  | 1.95840700  | 2.93685200  |
| Au | -0.10629900 | -1.37560100 | -0.92717200 |

|    |             |             |             |
|----|-------------|-------------|-------------|
| Br | -0.58696300 | -2.01109200 | 1.48782200  |
| Br | -2.01108300 | -2.80485300 | -1.77534500 |
| Br | 0.53144000  | -0.58711800 | -3.26798000 |
| C  | 3.22045300  | 0.80302400  | 1.21173900  |
| C  | 4.59217100  | 1.19045700  | 1.25348500  |
| C  | 5.55486500  | 0.19714300  | 1.35093700  |
| C  | 5.20526100  | -1.16779000 | 1.45555600  |
| C  | 3.87396000  | -1.55079900 | 1.51041900  |
| C  | 2.86458400  | -0.57121500 | 1.43169600  |
| C  | 5.00342000  | 2.61973200  | 1.12738100  |
| H  | 6.59729700  | 0.50146300  | 1.32993500  |
| H  | 3.59835600  | -2.58866200 | 1.67056400  |
| H  | 1.86798600  | -0.80730200 | 1.79947400  |
| O  | 6.16934000  | 2.96020300  | 1.09752300  |
| N  | 2.25278500  | 1.69661100  | 0.88666800  |
| H  | 5.99022500  | -1.91300300 | 1.54202900  |
| H  | 4.17928400  | 3.35303000  | 1.08051700  |
| C  | -2.13390500 | 1.96433500  | 2.19834500  |
| H  | -2.77543100 | 2.38494900  | 1.42721600  |
| H  | -2.05415500 | 0.87864900  | 2.14614100  |
| H  | -2.38480400 | 2.31856600  | 3.19900900  |

**IM4'**

|   |            |             |             |
|---|------------|-------------|-------------|
| C | 1.35862200 | 0.15614300  | -0.21701300 |
| C | 0.17833100 | 0.54651300  | 0.62529400  |
| H | 0.27060000 | 0.12084200  | 1.62711800  |
| N | 1.73307400 | -1.04136600 | -0.62646600 |
| C | 5.05030100 | -0.26858900 | -0.37329500 |
| C | 4.22361200 | -1.38211400 | -0.58105600 |
| C | 4.58469100 | -2.61882200 | -0.02517400 |
| C | 5.74660300 | -2.73673900 | 0.73961600  |
| C | 6.56345500 | -1.62340800 | 0.94844400  |
| C | 6.21525100 | -0.39353600 | 0.38642200  |
| H | 4.78063700 | 0.69070200  | -0.80410900 |
| H | 3.96498600 | -3.49197800 | -0.21004100 |
| H | 6.02029100 | -3.70108400 | 1.15939100  |
| H | 7.47161400 | -1.71684700 | 1.53793700  |
| H | 6.85378900 | 0.47333200  | 0.53368400  |
| C | 2.97066900 | -1.25727900 | -1.42822500 |
| H | 3.03622800 | -0.41410700 | -2.11744000 |
| H | 2.80037100 | -2.16918900 | -2.00392700 |
| C | 0.74522500 | -2.90880500 | 1.50110800  |
| H | 0.02333600 | -2.20963500 | 1.92732700  |
| H | 0.44218600 | -3.94550400 | 1.65740500  |

|    |             |             |             |
|----|-------------|-------------|-------------|
| H  | 1.78150800  | -2.73181000 | 1.78834500  |
| S  | 0.69181400  | -2.69681600 | -0.35298900 |
| O  | 1.61011600  | -3.73168000 | -0.99517900 |
| O  | -0.73060400 | -2.48451000 | -0.85105800 |
| Au | -1.80375500 | 0.04088000  | 0.00900300  |
| Br | -1.24426800 | 1.01987700  | -2.27751500 |
| Br | -4.21170400 | -0.40532900 | -0.66303600 |
| Br | -2.24895100 | -0.69799400 | 2.41904700  |
| C  | 1.71816000  | 2.27425400  | 0.09601600  |
| C  | 2.36734300  | 3.54846800  | 0.26739100  |
| C  | 1.83446500  | 4.38387700  | 1.22592000  |
| C  | 0.69491900  | 4.05892500  | 2.04514800  |
| C  | -0.01190600 | 2.92298700  | 1.81990200  |
| C  | 0.34189000  | 2.07826800  | 0.64998900  |
| C  | 3.62543200  | 3.94346100  | -0.41205200 |
| H  | 2.33833300  | 5.33168400  | 1.41075500  |
| H  | -0.89162300 | 2.66662000  | 2.40448000  |
| H  | -0.30320600 | 2.47665900  | -0.17095300 |
| O  | 4.28530600  | 3.24385800  | -1.15071700 |
| N  | 2.20985100  | 1.20807300  | -0.49370200 |
| H  | 0.41044800  | 4.74466700  | 2.83662800  |
| H  | 3.93909200  | 4.98593100  | -0.18113900 |

**TS3'-5'**

|    |             |             |             |
|----|-------------|-------------|-------------|
| C  | 0.23880000  | 1.09836400  | -0.30749300 |
| C  | 0.46599700  | -0.25586000 | -0.74044800 |
| H  | 0.72884000  | -0.35520700 | -1.78760800 |
| N  | -0.77894500 | 1.80146100  | 0.25142400  |
| C  | -0.70760400 | 3.25498200  | 0.53203100  |
| H  | 0.28890800  | 3.46161400  | 0.93120700  |
| H  | -1.43131200 | 3.44163300  | 1.32897700  |
| S  | -2.46961800 | 0.96583600  | 0.63830500  |
| O  | -3.23260700 | 2.10001900  | 1.32038300  |
| O  | -2.15848000 | -0.34606600 | 1.34645200  |
| Au | 0.22941400  | -2.00935900 | 0.27415100  |
| Br | -0.21419800 | -4.25910500 | 1.32081300  |
| Br | 1.82255600  | -1.38878600 | 2.13824200  |
| Br | -1.27069700 | -2.53073800 | -1.74510300 |
| C  | 2.47296400  | 2.00205600  | 0.24308300  |
| C  | 3.63959100  | 2.45098100  | -0.42370300 |
| C  | 4.63995200  | 3.09882700  | 0.31006000  |
| C  | 4.50849700  | 3.28426700  | 1.68338900  |
| C  | 3.36441800  | 2.81774400  | 2.34298800  |
| C  | 2.35011100  | 2.18094500  | 1.63389300  |

|   |             |             |             |
|---|-------------|-------------|-------------|
| C | 3.83286000  | 2.26173800  | -1.88711800 |
| H | 5.51818600  | 3.44230200  | -0.22745100 |
| H | 3.26564700  | 2.94122000  | 3.41739000  |
| H | 1.48975200  | 1.77472000  | 2.15453100  |
| O | 4.79640100  | 2.69274100  | -2.49115000 |
| N | 1.49397900  | 1.36850900  | -0.52484200 |
| C | -3.21051500 | 0.66523200  | -1.04762000 |
| H | -2.62253700 | -0.12682000 | -1.51404900 |
| H | -4.23290600 | 0.34421800  | -0.84152100 |
| H | -3.16829900 | 1.62466800  | -1.56263700 |
| C | -1.00806900 | 4.10516800  | -0.68638300 |
| C | -2.32869500 | 4.47641500  | -0.98049500 |
| C | 0.02406100  | 4.52652900  | -1.53527300 |
| C | -2.61077200 | 5.24207900  | -2.11331500 |
| H | -3.13046000 | 4.17494100  | -0.31123600 |
| C | -0.25889500 | 5.29290200  | -2.66719000 |
| H | 1.05434500  | 4.26687300  | -1.30555300 |
| C | -1.57697300 | 5.64814500  | -2.96034700 |
| H | -3.63612400 | 5.53065600  | -2.32757900 |
| H | 0.55059400  | 5.61690100  | -3.31518300 |
| H | -1.79647400 | 6.24701200  | -3.83972500 |
| H | 3.03918800  | 1.69438900  | -2.40766500 |
| H | 5.29473700  | 3.78056400  | 2.24414900  |

**IM5'**

|   |             |             |             |
|---|-------------|-------------|-------------|
| C | -1.09963000 | 0.68426000  | 0.66266900  |
| C | 0.32791100  | 0.64696900  | 0.94261300  |
| H | 0.60342700  | 0.98216600  | 1.94494400  |
| N | -2.30139500 | 0.24053600  | 0.86586100  |
| C | -4.00173600 | -1.02932800 | -1.41041700 |
| C | -4.44449400 | -0.14355100 | -0.41796300 |
| C | -5.79802500 | -0.13347600 | -0.05526500 |
| C | -6.70240800 | -1.00039200 | -0.67371900 |
| C | -6.25456500 | -1.88436600 | -1.65579900 |
| C | -4.90499900 | -1.89747800 | -2.02070000 |
| H | -2.95157000 | -1.05417900 | -1.68895000 |
| H | -6.15250200 | 0.56861400  | 0.69760400  |
| H | -7.75074500 | -0.98096100 | -0.38987000 |
| H | -6.95393500 | -2.56209600 | -2.13694600 |
| H | -4.55226300 | -2.58695900 | -2.78184100 |
| C | -3.49708200 | 0.84663600  | 0.22329800  |
| H | -3.10080800 | 1.54038500  | -0.52782600 |
| H | -4.02457100 | 1.44261200  | 0.97644500  |
| S | -2.33184100 | -1.49382100 | 1.88567500  |



|    |             |             |             |
|----|-------------|-------------|-------------|
| O  | -1.07655600 | -1.36878500 | 2.73287700  |
| O  | -2.58599300 | -2.64630800 | 0.93477100  |
| Au | 1.73772300  | -0.57872100 | 0.03298400  |
| Br | 3.34726600  | 0.19949500  | 1.83133400  |
| Br | 3.50419500  | -2.07426000 | -1.00597500 |
| Br | 0.04827300  | -1.22602800 | -1.77051100 |
| C  | -0.56767200 | 3.09618800  | 0.04404400  |
| C  | 0.24974800  | 3.80179800  | -0.85697600 |
| C  | 0.14075100  | 5.19708200  | -0.91242900 |
| C  | -0.76389400 | 5.87759600  | -0.10281500 |
| C  | -1.57256300 | 5.16356800  | 0.78669200  |
| C  | -1.47432700 | 3.77471200  | 0.86690600  |
| C  | 1.21501600  | 3.11390700  | -1.76765500 |
| H  | 0.78240700  | 5.72140400  | -1.61364900 |
| H  | -2.27457300 | 5.68746200  | 1.42900400  |
| H  | -2.08129500 | 3.22217300  | 1.57839000  |
| O  | 1.91362300  | 3.72513400  | -2.55090000 |
| N  | -0.44771200 | 1.68359200  | 0.11038000  |
| H  | 1.25754500  | 2.01202300  | -1.69732300 |
| H  | -0.83981400 | 6.95923000  | -0.15870700 |
| C  | -3.84328300 | -1.19383700 | 2.94046800  |
| H  | -3.65306500 | -0.27504300 | 3.49336900  |
| H  | -4.68981100 | -1.13558600 | 2.25741000  |
| H  | -3.89713100 | -2.06430300 | 3.59630900  |

**TS5'-6'**

|   |             |             |             |
|---|-------------|-------------|-------------|
| C | 1.60243000  | -0.36540300 | 0.09581200  |
| C | 0.36854000  | 0.20879600  | 0.57037000  |
| H | 0.51434800  | 0.93859100  | 1.36477700  |
| N | 1.92151100  | -1.65699600 | 0.11028200  |
| C | 0.62069700  | -1.58695100 | 2.88957500  |
| C | 0.13365300  | -2.25218900 | 1.74669200  |
| C | -1.22770400 | -2.60146400 | 1.68478400  |
| C | -2.08431600 | -2.28844000 | 2.73719600  |
| C | -1.59582600 | -1.61908100 | 3.86448200  |
| C | -0.24711400 | -1.26928000 | 3.93650100  |
| H | 1.66968700  | -1.31960100 | 2.95836400  |
| H | -1.61105900 | -3.11565000 | 0.80768900  |
| H | -3.13513700 | -2.55424600 | 2.67254300  |
| H | -2.26789600 | -1.36875200 | 4.67999800  |
| H | 0.13757400  | -0.75211500 | 4.81064300  |
| C | 1.06105200  | -2.72612200 | 0.64125400  |
| H | 1.73636000  | -3.50703900 | 1.00435300  |
| H | 0.47318900  | -3.14653500 | -0.18095700 |

|    |             |             |             |
|----|-------------|-------------|-------------|
| C  | 3.29382000  | -1.93340300 | -2.45343800 |
| H  | 3.04135100  | -0.88283900 | -2.58386700 |
| H  | 4.23422200  | -2.21242300 | -2.93055500 |
| H  | 2.47385900  | -2.60026700 | -2.71489200 |
| S  | 3.58812500  | -2.16915500 | -0.62689600 |
| O  | 3.65152200  | -3.66182300 | -0.30984800 |
| O  | 4.64782200  | -1.19139300 | -0.13418400 |
| Au | -1.44507300 | 0.24891500  | -0.34256600 |
| Br | -0.66868500 | -1.23191900 | -2.28043500 |
| Br | -3.76182100 | 0.31673300  | -1.34296900 |
| Br | -2.16450000 | 1.84455800  | 1.50175300  |
| C  | 2.61099500  | 1.87067000  | -0.43082600 |
| C  | 3.24712200  | 2.38837300  | 0.73680100  |
| C  | 3.75895200  | 3.69620600  | 0.70793000  |
| C  | 3.62826800  | 4.51186900  | -0.40955200 |
| C  | 2.99470000  | 4.00288700  | -1.54926300 |
| C  | 2.51034600  | 2.70040900  | -1.56609200 |
| C  | 3.42486600  | 1.63753400  | 1.98681900  |
| H  | 4.26098100  | 4.07044100  | 1.59749800  |
| H  | 2.88654200  | 4.62230800  | -2.43494000 |
| H  | 2.03612200  | 2.29446500  | -2.45404000 |
| O  | 2.88850500  | 0.57873200  | 2.27650600  |
| N  | 2.20678400  | 0.56334400  | -0.58946900 |
| H  | 4.01764100  | 5.52482300  | -0.39991400 |
| H  | 4.10447900  | 2.12797300  | 2.71438500  |

**IM6'**

|    |             |             |             |
|----|-------------|-------------|-------------|
| C  | -1.31355700 | 0.16550500  | 0.11667700  |
| C  | 0.02692800  | 0.79083800  | 0.38987100  |
| H  | 0.11666500  | 1.02674200  | 1.44888400  |
| N  | -1.80005700 | 0.59186200  | -1.16606100 |
| C  | -0.80885400 | 1.46566600  | -1.75267400 |
| H  | -1.27117600 | 2.22916800  | -2.38021900 |
| H  | -0.10835800 | 0.85598100  | -2.32914900 |
| S  | -3.53630600 | 1.43014600  | -1.20688600 |
| O  | -3.37193200 | 2.60604900  | -2.18456900 |
| O  | -4.02409800 | 1.67863300  | 0.22482800  |
| Au | 1.74076100  | -0.47361700 | 0.07389900  |
| Br | 3.82837400  | -1.93420800 | -0.11359600 |
| Br | 2.96244900  | 1.13318600  | 1.63002100  |
| Br | 0.59627700  | -1.90458000 | -1.69081700 |
| C  | -2.99363400 | -1.36465400 | 0.88937700  |
| C  | -4.03540300 | -1.22176800 | 1.84370300  |
| C  | -5.12216000 | -2.10554000 | 1.80549000  |

|   |             |             |             |
|---|-------------|-------------|-------------|
| C | -5.19545200 | -3.13006900 | 0.86523900  |
| C | -4.15300200 | -3.28302900 | -0.05499900 |
| C | -3.06380100 | -2.41140000 | -0.05106500 |
| C | -4.02131800 | -0.17978900 | 2.89409700  |
| H | -5.91798800 | -1.97997000 | 2.53671500  |
| H | -4.18087800 | -4.09228800 | -0.77997600 |
| H | -2.23693400 | -2.54661100 | -0.74143200 |
| O | -3.18708200 | 0.69179300  | 3.03783600  |
| N | -1.85852500 | -0.57891200 | 0.98273800  |
| C | 0.02383800  | 2.10146000  | -0.51597400 |
| C | 1.33725000  | 2.56728800  | -0.97455600 |
| C | -0.77688600 | 3.12802000  | 0.17812000  |
| C | 1.75386900  | 3.87124000  | -0.82731600 |
| H | 1.97074400  | 1.85128800  | -1.48973800 |
| C | -0.32664500 | 4.41324200  | 0.36072200  |
| H | -1.74914000 | 2.83890000  | 0.57300200  |
| C | 0.92825400  | 4.78848700  | -0.15655900 |
| H | 2.72505700  | 4.18093800  | -1.19799900 |
| H | -0.93490900 | 5.13856000  | 0.89091500  |
| H | 1.26952800  | 5.81263000  | -0.02824800 |
| C | -4.55892500 | 0.12440700  | -2.04054000 |
| H | -4.09891700 | -0.02651700 | -3.01600800 |
| H | -4.51796000 | -0.76380400 | -1.41285300 |
| H | -5.56015800 | 0.55051600  | -2.11381900 |
| H | -4.87916800 | -0.25835900 | 3.60023000  |
| H | -6.04213600 | -3.80960600 | 0.85635300  |

**TS6'-7'**

|   |             |             |            |
|---|-------------|-------------|------------|
| C | 1.81569600  | 0.05598800  | 0.14441500 |
| C | 0.47537800  | 0.04831900  | 0.80409400 |
| H | 0.36660600  | 0.90494100  | 1.46288200 |
| N | 2.54661200  | -1.09240800 | 0.29003800 |
| C | 0.93473100  | -0.88645400 | 2.68119600 |
| C | 0.78113000  | -1.91935600 | 1.71442200 |
| C | -0.37910100 | -2.74135500 | 1.76543800 |
| C | -1.33333500 | -2.53067600 | 2.73663100 |
| C | -1.18346500 | -1.48932000 | 3.68742700 |
| C | -0.06930000 | -0.67947900 | 3.66155500 |
| H | 1.87079100  | -0.34245400 | 2.75707100 |
| H | -0.49982500 | -3.52857200 | 1.02824200 |
| H | -2.21844800 | -3.15883100 | 2.76768000 |
| H | -1.95412700 | -1.33465400 | 4.43585800 |
| H | 0.06220900  | 0.11589500  | 4.38752000 |
| C | 1.91832900  | -2.30460700 | 0.79308800 |

|    |             |             |             |
|----|-------------|-------------|-------------|
| H  | 2.66673900  | -2.88800800 | 1.33878300  |
| H  | 1.53275900  | -2.92345700 | -0.02361900 |
| C  | 4.05072200  | -0.92406600 | -2.21697400 |
| H  | 3.71632100  | 0.10725000  | -2.30037000 |
| H  | 5.04083100  | -1.09650100 | -2.64071200 |
| H  | 3.31192800  | -1.64244600 | -2.57000800 |
| S  | 4.25681800  | -1.24563200 | -0.39095900 |
| O  | 4.54467000  | -2.73588200 | -0.17995600 |
| O  | 5.13470600  | -0.17073200 | 0.23432300  |
| Au | -1.29861800 | -0.22836500 | -0.24805000 |
| Br | -0.16638400 | -1.65271500 | -2.04513700 |
| Br | -3.50897600 | -0.50983700 | -1.45074800 |
| Br | -2.40035400 | 1.32816900  | 1.43837000  |
| C  | 1.66244100  | 2.32329000  | -0.63444500 |
| C  | 1.69853600  | 3.30068700  | 0.39951500  |
| C  | 1.25518500  | 4.60812800  | 0.12232800  |
| C  | 0.74046800  | 4.95738200  | -1.11834700 |
| C  | 0.69057700  | 3.98742300  | -2.12554500 |
| C  | 1.16319300  | 2.69890200  | -1.89305400 |
| C  | 2.15527500  | 3.04702600  | 1.77389900  |
| H  | 1.30727400  | 5.34923400  | 0.91707300  |
| H  | 0.29257600  | 4.23863600  | -3.10473600 |
| H  | 1.14975900  | 1.95490800  | -2.68369100 |
| O  | 2.31397700  | 1.95772200  | 2.30861000  |
| N  | 2.24776400  | 1.05807000  | -0.52466400 |
| H  | 0.38680200  | 5.96640800  | -1.30464700 |
| H  | 2.33330700  | 3.97248000  | 2.36171000  |

**TS3'-9'**

|   |             |             |             |
|---|-------------|-------------|-------------|
| C | 1.16528400  | 1.04628800  | -0.58256800 |
| C | -0.18860300 | 1.08423100  | 0.03556500  |
| H | -0.46284100 | 2.07818500  | 0.35484700  |
| N | 1.83960700  | -0.14401000 | -0.81343400 |
| C | 3.93375800  | -1.32031800 | 1.05658100  |
| C | 4.04124200  | -1.19339500 | -0.33698700 |
| C | 4.86889800  | -2.07643600 | -1.04026400 |
| C | 5.58485400  | -3.06758200 | -0.36291500 |
| C | 5.47309400  | -3.18785800 | 1.02307200  |
| C | 4.64372900  | -2.31278400 | 1.73169800  |
| H | 3.28236800  | -0.64697200 | 1.60848400  |
| H | 4.94241900  | -1.99424500 | -2.12122000 |
| H | 6.22362900  | -3.74714400 | -0.92037200 |
| H | 6.02645700  | -3.96035100 | 1.54996400  |
| H | 4.55157500  | -2.40284500 | 2.81061900  |

|    |             |             |             |
|----|-------------|-------------|-------------|
| C  | 3.29952700  | -0.09043700 | -1.06344400 |
| H  | 3.62302600  | 0.89010100  | -0.71034400 |
| H  | 3.49843800  | -0.12518600 | -2.13845000 |
| S  | 1.07967400  | -1.58952300 | -1.82800800 |
| O  | 2.05591100  | -1.82184200 | -2.98262000 |
| O  | -0.38962900 | -1.25448100 | -2.10313200 |
| Au | -1.69600100 | -0.26453400 | 0.20879900  |
| Br | -2.00216100 | 1.47465700  | -1.70982600 |
| Br | -3.82672200 | -1.59645900 | 0.00856200  |
| Br | -0.96431000 | -1.54874900 | 2.24603900  |
| C  | 1.55727700  | 3.38059500  | -0.17263300 |
| C  | 1.37493500  | 3.56249800  | 1.23468600  |
| C  | 1.35393300  | 4.87056000  | 1.76506600  |
| C  | 1.41470400  | 5.98483800  | 0.94442000  |
| C  | 1.56774700  | 5.80265900  | -0.43886400 |
| C  | 1.67080100  | 4.52917400  | -0.98192800 |
| C  | 1.28323800  | 2.47196300  | 2.20210800  |
| H  | 1.26167600  | 4.99080800  | 2.84231500  |
| H  | 1.63439000  | 6.66691400  | -1.09365800 |
| H  | 1.84592300  | 4.38595100  | -2.04320900 |
| O  | 0.93944100  | 1.30519700  | 1.99203700  |
| N  | 1.80172200  | 2.16156100  | -0.77507600 |
| C  | 1.16850000  | -3.02458900 | -0.64567600 |
| H  | 2.22598000  | -3.21443900 | -0.47531000 |
| H  | 0.63076000  | -2.72496700 | 0.25387500  |
| H  | 0.66890900  | -3.83644200 | -1.17673300 |
| H  | 1.36094900  | 6.98314900  | 1.36625400  |
| H  | 1.54482100  | 2.74704700  | 3.24058500  |

**IM7'**

|    |             |             |             |
|----|-------------|-------------|-------------|
| C  | -1.42848200 | 0.21535300  | 0.09762300  |
| C  | -0.15404200 | 0.73577100  | 0.69438500  |
| H  | -0.17706000 | 0.55979700  | 1.77024100  |
| N  | -2.32161400 | 1.14910200  | -0.56828900 |
| C  | -1.66578900 | 2.13273500  | -1.44085100 |
| H  | -2.39603000 | 2.92884300  | -1.63928300 |
| H  | -1.46094800 | 1.63824000  | -2.39573500 |
| S  | -3.36871100 | 2.12622500  | 0.69366300  |
| O  | -4.10543200 | 3.16949500  | -0.15647600 |
| O  | -2.46756500 | 2.60357900  | 1.86796800  |
| Au | 1.57657100  | -0.38735400 | 0.08792100  |
| Br | 3.63443800  | -1.75566800 | -0.58254200 |
| Br | 2.16251400  | -0.61235200 | 2.54627600  |
| Br | 1.05322900  | 0.10666700  | -2.36291900 |

|   |             |             |             |
|---|-------------|-------------|-------------|
| C | -2.74886700 | -1.72140400 | -0.38191500 |
| C | -3.56772300 | -2.60497000 | 0.37122100  |
| C | -4.44136100 | -3.47990300 | -0.29421400 |
| C | -4.54278600 | -3.48109500 | -1.68022300 |
| C | -3.73643600 | -2.60824100 | -2.41958300 |
| C | -2.84877100 | -1.74367400 | -1.78532300 |
| C | -3.54921100 | -2.62562600 | 1.84101700  |
| H | -5.05009200 | -4.15815800 | 0.29978600  |
| H | -3.78778700 | -2.61027900 | -3.50494000 |
| H | -2.18339800 | -1.11452400 | -2.36647100 |
| O | -3.13596300 | -1.72593200 | 2.55777100  |
| N | -1.72436500 | -1.01424800 | 0.23781600  |
| C | -0.38399600 | 2.71720900  | -0.89400300 |
| C | 0.28206200  | 3.75418200  | -1.52872700 |
| C | 0.06383800  | 2.24638700  | 0.42119300  |
| C | 1.42679400  | 4.30360700  | -0.94591400 |
| H | -0.07343100 | 4.13199800  | -2.48305600 |
| C | 1.30082100  | 2.83100700  | 0.94835600  |
| H | -0.74142600 | 2.70098300  | 1.09898200  |
| C | 1.93967700  | 3.84997700  | 0.29076200  |
| H | 1.94006600  | 5.11117100  | -1.46185400 |
| H | 1.67454100  | 2.44399300  | 1.89261200  |
| H | 2.83953100  | 4.29736700  | 0.69941800  |
| C | -4.54218900 | 0.84964900  | 1.33115700  |
| H | -5.07732600 | 0.47598100  | 0.45945500  |
| H | -3.94372400 | 0.08646800  | 1.83489700  |
| H | -5.19285400 | 1.39217000  | 2.01858300  |
| H | -5.22608000 | -4.15875500 | -2.18234400 |
| H | -3.97774900 | -3.54349000 | 2.29623700  |

**IM9'**

|   |            |             |             |
|---|------------|-------------|-------------|
| C | 1.38563100 | -0.16136400 | 0.75569700  |
| C | 0.31997800 | -0.86086100 | -0.09897000 |
| H | 0.27977600 | -1.90296300 | 0.22111800  |
| N | 1.30577300 | 1.14696900  | 1.15441900  |
| C | 4.86546300 | 1.78210200  | 0.53879800  |
| C | 3.49422400 | 2.01894700  | 0.38785800  |
| C | 3.01680600 | 2.50757400  | -0.83595000 |
| C | 3.90162600 | 2.75662700  | -1.88653200 |
| C | 5.27060000 | 2.52797500  | -1.72591200 |
| C | 5.75100900 | 2.04074400  | -0.50923500 |
| H | 5.24223500 | 1.39507200  | 1.48265000  |
| H | 1.95235500 | 2.67713400  | -0.97303700 |
| H | 3.51871800 | 3.13502500  | -2.83061400 |

|    |             |             |             |
|----|-------------|-------------|-------------|
| H  | 5.95765800  | 2.72761400  | -2.54381800 |
| H  | 6.81367000  | 1.85652600  | -0.37523700 |
| C  | 2.56741500  | 1.79576600  | 1.56962600  |
| H  | 3.07074700  | 1.20864400  | 2.34438200  |
| H  | 2.29288200  | 2.75345400  | 2.02199400  |
| C  | -1.07781000 | 2.91180000  | 1.78507200  |
| H  | -1.43869700 | 2.60631900  | 0.80471200  |
| H  | -1.88119400 | 3.05979300  | 2.50833000  |
| H  | -0.39330500 | 3.75808800  | 1.74468000  |
| S  | -0.08448400 | 1.50369500  | 2.49247700  |
| O  | 0.68681300  | 2.04070400  | 3.69987600  |
| O  | -0.90253500 | 0.21469800  | 2.57691200  |
| Au | -1.66896300 | -0.23110700 | -0.33940000 |
| Br | -2.36389800 | -2.45847400 | 0.67217800  |
| Br | -4.09479300 | 0.51726500  | -0.49983600 |
| Br | -0.93627300 | 1.79792000  | -1.72571200 |
| C  | 2.90076700  | -1.99440900 | 0.46280000  |
| C  | 2.69623100  | -2.38649200 | -0.90979600 |
| C  | 3.41597200  | -3.49754500 | -1.44808900 |
| C  | 4.20440600  | -4.27649900 | -0.63857900 |
| C  | 4.34437200  | -3.93639100 | 0.73003800  |
| C  | 3.73544900  | -2.81642600 | 1.25933600  |
| C  | 1.85229400  | -1.67938400 | -1.77939300 |
| H  | 3.29295900  | -3.73722500 | -2.50097200 |
| H  | 4.97111300  | -4.55207300 | 1.36891300  |
| H  | 3.89232100  | -2.52241200 | 2.29153100  |
| O  | 0.89448100  | -0.87639100 | -1.46159900 |
| N  | 2.47581400  | -0.82656400 | 1.01318400  |
| H  | 4.72200300  | -5.14140300 | -1.03970900 |
| H  | 1.96260100  | -1.77605000 | -2.85929200 |

**TS4'-10'**

|   |             |            |             |
|---|-------------|------------|-------------|
| C | 0.57380500  | 1.07055300 | -0.03998500 |
| C | -0.26082000 | 0.22234000 | -0.98650800 |
| H | -0.67004400 | 0.81314100 | -1.80717600 |
| N | 0.19545300  | 2.19177000 | 0.63700600  |
| C | 3.12324100  | 3.75746800 | -0.03286100 |
| C | 1.89149400  | 4.01650300 | 0.58353900  |
| C | 1.29589600  | 5.27677200 | 0.42770800  |
| C | 1.91474200  | 6.26138000 | -0.34345100 |
| C | 3.13994200  | 5.99654300 | -0.96054000 |
| C | 3.74245700  | 4.74711500 | -0.79981300 |
| H | 3.58925600  | 2.78369300 | 0.08849500  |
| H | 0.35497200  | 5.49003400 | 0.93088900  |

|    |             |             |             |
|----|-------------|-------------|-------------|
| H  | 1.44838400  | 7.23711100  | -0.45192700 |
| H  | 3.62610100  | 6.76402700  | -1.55700100 |
| H  | 4.70040100  | 4.54063200  | -1.26971200 |
| C  | 1.20817000  | 2.95589500  | 1.42038700  |
| H  | 1.92243700  | 2.22781900  | 1.80786600  |
| H  | 0.67396100  | 3.40884600  | 2.25730000  |
| C  | -2.29170900 | 3.30127700  | -0.41960200 |
| H  | -2.38024900 | 2.51807000  | -1.17115400 |
| H  | -3.26978400 | 3.67431100  | -0.11273800 |
| H  | -1.60534300 | 4.10224700  | -0.69251600 |
| S  | -1.57298800 | 2.54639100  | 1.12270100  |
| O  | -1.46189000 | 3.66003700  | 2.16597600  |
| O  | -2.27853300 | 1.22240100  | 1.47189200  |
| Au | -1.99086800 | -0.83597600 | -0.22939500 |
| Br | -0.21886200 | -2.23687700 | 1.16058100  |
| Br | -3.95331100 | -2.18842200 | 0.66952300  |
| Br | -3.36013400 | 0.07991500  | -2.14079800 |
| C  | 2.01723200  | -0.33439800 | -0.86369100 |
| C  | 3.21984900  | -0.99976300 | -1.19950000 |
| C  | 3.14004300  | -2.03937800 | -2.13598500 |
| C  | 1.93859800  | -2.41906200 | -2.75463900 |
| C  | 0.75241600  | -1.76677900 | -2.43364100 |
| C  | 0.78083700  | -0.76639300 | -1.43764700 |
| C  | 4.55354300  | -0.62200100 | -0.67356100 |
| H  | 4.05743400  | -2.56068500 | -2.40188200 |
| H  | -0.18593700 | -2.04509600 | -2.90579500 |
| H  | 0.62318600  | -1.75303100 | -0.16027400 |
| O  | 4.80280000  | 0.32763000  | 0.04026800  |
| N  | 1.84967500  | 0.72042300  | 0.00064600  |
| H  | 1.93796600  | -3.21689300 | -3.48993500 |
| H  | 5.36584300  | -1.30526900 | -1.01018500 |

**IM10'**

|   |             |            |             |
|---|-------------|------------|-------------|
| C | 1.20644600  | 1.06709700 | -0.00246100 |
| C | 0.38152800  | 0.17036900 | -0.84769200 |
| H | -0.35341200 | 0.67142800 | -1.47032200 |
| N | 0.83503000  | 2.12636300 | 0.72647200  |
| C | 4.10563500  | 3.53759100 | 0.93952400  |
| C | 2.72331000  | 3.75364600 | 0.91889000  |
| C | 2.21620500  | 4.87888600 | 0.25356000  |
| C | 3.07815400  | 5.76127100 | -0.39475300 |
| C | 4.45790900  | 5.53350100 | -0.37989700 |
| C | 4.97041100  | 4.42407700 | 0.29141800  |
| H | 4.51999400  | 2.68210400 | 1.46937100  |



|                      |             |             |             |
|----------------------|-------------|-------------|-------------|
| H                    | 1.14605400  | 5.07028400  | 0.26500400  |
| H                    | 2.67592900  | 6.63299200  | -0.90354800 |
| H                    | 5.12857800  | 6.22305800  | -0.88477700 |
| H                    | 6.04089700  | 4.24214800  | 0.31371800  |
| C                    | 1.78134100  | 2.80672400  | 1.63917000  |
| H                    | 2.32467100  | 2.04172200  | 2.20685100  |
| H                    | 1.16476500  | 3.36511800  | 2.34945800  |
| C                    | -1.83641600 | 2.81980900  | -0.49099600 |
| H                    | -2.10860500 | 1.85149300  | -0.91503000 |
| H                    | -2.71637400 | 3.41241400  | -0.23540700 |
| H                    | -1.11565500 | 3.38901900  | -1.07671400 |
| S                    | -1.03311100 | 2.49984400  | 1.16627000  |
| O                    | -0.87650300 | 3.83892200  | 1.88580600  |
| O                    | -1.65631600 | 1.28937500  | 1.84872900  |
| Au                   | -0.87746900 | -1.20122200 | 0.30584700  |
| Br                   | 0.95279800  | -1.58966800 | 2.03233600  |
| Br                   | -2.36233500 | -2.89364800 | 1.47155400  |
| Br                   | -2.65518600 | -0.81883000 | -1.50631200 |
| C                    | 2.64779600  | -0.33384000 | -1.04126400 |
| C                    | 3.83223000  | -0.96456800 | -1.43358100 |
| C                    | 3.71238500  | -1.97004600 | -2.41030600 |
| C                    | 2.46917200  | -2.30536800 | -2.94975100 |
| C                    | 1.29711700  | -1.66294800 | -2.52383500 |
| C                    | 1.39132300  | -0.66400300 | -1.55426700 |
| C                    | 5.11752700  | -0.57834300 | -0.84462400 |
| H                    | 4.60743000  | -2.48915000 | -2.74344800 |
| H                    | 0.33050000  | -1.94786400 | -2.92827100 |
| H                    | 3.30943700  | 1.09867000  | 0.34908500  |
| O                    | 5.24393200  | 0.30804800  | -0.00695500 |
| N                    | 2.49826800  | 0.70495800  | -0.11829500 |
| H                    | 2.40433700  | -3.08359000 | -3.70342300 |
| H                    | 6.00209200  | -1.14047500 | -1.20336100 |
| <b>P<sub>t</sub></b> |             |             |             |
| C                    | 0.16891700  | 0.38278600  | -0.38277800 |
| C                    | 0.80604400  | 0.22606300  | -1.59906800 |
| H                    | 0.38805100  | 0.46488300  | -2.56616900 |
| N                    | -1.10188100 | 0.83199500  | -0.02657000 |
| C                    | -2.33267900 | -2.16917500 | -1.20889800 |
| C                    | -2.61042000 | -1.05447100 | -0.41112200 |
| C                    | -3.25316800 | -1.24306800 | 0.82032200  |
| C                    | -3.61614800 | -2.52114200 | 1.24119400  |
| C                    | -3.33932200 | -3.62958100 | 0.43507600  |
| C                    | -2.69749500 | -3.45138900 | -0.79068100 |

|   |             |             |             |
|---|-------------|-------------|-------------|
| H | -1.82918200 | -2.03270500 | -2.16283100 |
| H | -3.46787600 | -0.38019900 | 1.44584700  |
| H | -4.11909400 | -2.65403600 | 2.19541400  |
| H | -3.62443600 | -4.62594000 | 0.76207700  |
| H | -2.47888400 | -4.30824700 | -1.42235200 |
| C | -2.22330400 | 0.33855400  | -0.86167800 |
| H | -1.97340500 | 0.34154700  | -1.93023200 |
| H | -3.05185400 | 1.03639800  | -0.70770300 |
| C | -0.41230400 | 3.13658800  | 1.62938200  |
| H | 0.59969300  | 2.73429800  | 1.61930700  |
| H | -0.41802700 | 4.22191400  | 1.73298100  |
| H | -1.05434800 | 2.64836700  | 2.36042400  |
| S | -1.15868400 | 2.78750700  | -0.03988600 |
| O | -2.65100500 | 3.16417300  | 0.01155000  |
| O | -0.22542000 | 3.36336900  | -1.11729800 |
| C | 2.23972000  | -0.35123400 | 0.09278300  |
| C | 3.41125500  | -0.81215700 | 0.72725800  |
| C | 4.48970300  | -1.15401200 | -0.09744200 |
| C | 4.40578300  | -1.04384000 | -1.49478300 |
| C | 3.23805000  | -0.59704900 | -2.11156800 |
| C | 2.12718400  | -0.24857400 | -1.32379600 |
| C | 3.47963100  | -0.92149800 | 2.18286600  |
| H | 5.40865400  | -1.51152900 | 0.36146400  |
| H | 3.18736900  | -0.52055300 | -3.19444000 |
| H | 0.83986800  | -0.05032900 | 1.62205600  |
| O | 2.55602500  | -0.63840600 | 2.93843300  |
| N | 1.05869900  | 0.05421700  | 0.63963000  |
| H | 5.26366700  | -1.31401800 | -2.10308500 |
| H | 4.44555500  | -1.28734100 | 2.59010700  |

Cartesian coordinates for the stationary points given in Fig. S2

**1b**

|   |             |             |             |
|---|-------------|-------------|-------------|
| C | 1.39249900  | -1.21292700 | 1.65109200  |
| C | 1.20079300  | -1.06128500 | 2.83974800  |
| H | 1.06981300  | -0.98758200 | 3.89382600  |
| N | 1.59809600  | -1.39917700 | 0.34400000  |
| C | 2.57080700  | -0.56607700 | -0.40211000 |
| H | 2.42366400  | -0.81332000 | -1.45780200 |
| H | 3.56302900  | -0.92505100 | -0.10959600 |
| C | -2.44471000 | 1.27479900  | -0.92547600 |
| C | -1.41714300 | 0.36527100  | -1.17385400 |
| C | -1.27988500 | -0.71202100 | -0.30909400 |
| C | -2.11144400 | -0.91419900 | 0.78648100  |
| C | -3.12692500 | 0.01203500  | 1.01576600  |

|   |             |             |             |
|---|-------------|-------------|-------------|
| C | -3.30699800 | 1.11700000  | 0.16942000  |
| H | -2.58246000 | 2.11732700  | -1.59830900 |
| H | -0.74866500 | 0.47861900  | -2.01922400 |
| H | -1.97748500 | -1.78195000 | 1.42235000  |
| H | -3.79418400 | -0.13022900 | 1.86203600  |
| C | -4.39950400 | 2.12251200  | 0.44528600  |
| H | -4.63157300 | 2.71711900  | -0.44356100 |
| H | -5.32073500 | 1.63142200  | 0.77690500  |
| H | -4.09983900 | 2.81886800  | 1.23950800  |
| S | 0.05978200  | -1.93639600 | -0.62596700 |
| O | -0.35237100 | -3.26046000 | 0.01570500  |
| O | 0.49559900  | -1.82462100 | -2.09422300 |
| C | 1.66848100  | 2.91334900  | -0.52666800 |
| C | 2.64135300  | 3.06663900  | 0.41266000  |
| C | 3.17860400  | 1.75784600  | 0.64109800  |
| C | 2.49653900  | 0.90470100  | -0.17725800 |
| O | 1.56623100  | 1.60668200  | -0.90052100 |
| H | 0.99327700  | 3.59591100  | -1.01984500 |
| H | 2.94268400  | 3.99159100  | 0.88410300  |
| H | 3.96882500  | 1.48517500  | 1.32684500  |

### IM13

|   |             |             |             |
|---|-------------|-------------|-------------|
| C | -1.13483400 | 1.10271100  | 0.41921400  |
| C | -0.93938300 | 0.04192000  | 1.13916600  |
| H | -1.47364800 | -0.15700900 | 2.06236400  |
| N | -1.35308400 | 2.02523200  | -0.38461100 |
| C | -0.63855300 | 3.33772200  | -0.55459900 |
| H | -1.31786700 | 3.96209700  | -1.14081400 |
| H | 0.25961200  | 3.12941900  | -1.14187400 |
| C | -6.18547400 | 0.95761300  | -0.19358000 |
| C | -5.11274200 | 1.56873700  | -0.83672800 |
| C | -4.04412000 | 0.75893300  | -1.21004200 |
| C | -3.98155900 | -0.60737400 | -0.95257900 |
| C | -5.06840400 | -1.18572100 | -0.29989100 |
| C | -6.18102400 | -0.42047300 | 0.08326900  |
| H | -7.04062400 | 1.56103100  | 0.09790800  |
| H | -5.10914500 | 2.63083100  | -1.05677500 |
| H | -3.12301800 | -1.20395500 | -1.24122500 |
| H | -5.03673000 | -2.24875400 | -0.07931500 |
| C | -7.35872300 | -1.07237200 | 0.76416900  |
| H | -7.95777100 | -0.34355700 | 1.31820400  |
| H | -8.01690700 | -1.54824700 | 0.02551900  |
| H | -7.03446500 | -1.85311500 | 1.45969800  |
| S | -2.62140100 | 1.54929400  | -2.04017400 |

|    |             |             |             |
|----|-------------|-------------|-------------|
| O  | -1.81721000 | 0.52958800  | -2.84437700 |
| O  | -2.98197600 | 2.93780300  | -2.57667700 |
| C  | -0.70458700 | 5.10380200  | 2.55606900  |
| C  | 0.62294200  | 4.79933100  | 2.60680800  |
| C  | 0.90608700  | 4.04747900  | 1.42242700  |
| C  | -0.27281200 | 3.95940300  | 0.73653000  |
| O  | -1.27136700 | 4.60237000  | 1.42416900  |
| H  | -1.36954400 | 5.64893200  | 3.20883500  |
| H  | 1.32007900  | 5.07540600  | 3.38505700  |
| H  | 1.85625600  | 3.62951300  | 1.11654800  |
| Au | 0.40258000  | -1.37679600 | 0.49817200  |
| Br | 2.11221700  | -3.14055600 | -0.28531800 |
| Br | -1.50030800 | -3.12717900 | 0.82562600  |
| Br | 4.76094400  | 2.12534800  | -0.59273700 |
| Br | 2.15833800  | 0.51264600  | 0.18393700  |
| K  | 4.69398900  | -1.07097000 | -0.98651200 |

**TS13-14**

|   |             |             |             |
|---|-------------|-------------|-------------|
| C | 1.62100900  | 1.17263000  | 0.22466400  |
| C | 1.47272600  | -0.02525300 | -0.30300200 |
| H | 2.29651200  | -0.71351200 | -0.44107300 |
| N | 1.01693600  | 2.23665700  | 0.63422700  |
| C | 1.28459700  | 3.57722500  | 0.05862700  |
| H | 1.50740200  | 3.38560500  | -0.99802200 |
| H | 2.17835500  | 3.99611900  | 0.53358700  |
| C | -3.20758200 | 0.92241000  | 2.71071800  |
| C | -1.81304200 | 0.94836600  | 2.69297700  |
| C | -1.19809600 | 2.19540900  | 2.73300400  |
| C | -1.89513700 | 3.39939100  | 2.77978200  |
| C | -3.28460200 | 3.33717300  | 2.79204100  |
| C | -3.96290700 | 2.10557800  | 2.75016900  |
| H | -3.71345700 | -0.03863100 | 2.68362000  |
| H | -1.23160200 | 0.03340200  | 2.65121600  |
| H | -1.37273400 | 4.34889800  | 2.79169700  |
| H | -3.85599600 | 4.26010400  | 2.80854300  |
| C | -5.46735300 | 2.07710600  | 2.70722800  |
| H | -5.85403700 | 1.05649900  | 2.78314900  |
| H | -5.89742700 | 2.67080900  | 3.52245100  |
| H | -5.81593500 | 2.51758400  | 1.76273300  |
| S | 0.62520100  | 2.24695800  | 2.63586200  |
| O | 1.20654200  | 3.57505600  | 3.13001100  |
| O | 1.21386500  | 0.90094700  | 3.08049000  |
| C | -1.86660000 | 5.30080300  | -0.19577900 |
| C | -1.21979300 | 6.28112200  | 0.49672300  |

|    |             |             |             |
|----|-------------|-------------|-------------|
| C  | 0.09911200  | 5.78822200  | 0.75738400  |
| C  | 0.16527600  | 4.54364500  | 0.19927900  |
| O  | -1.03063400 | 4.23761800  | -0.39554000 |
| H  | -2.87890500 | 5.17609700  | -0.56180000 |
| H  | -1.63544400 | 7.23389200  | 0.79291700  |
| H  | 0.89259000  | 6.28260500  | 1.30067000  |
| Au | -0.35547200 | -0.70065300 | -0.92526600 |
| Br | -2.66317500 | -1.58613700 | -1.63217600 |
| Br | -0.18123100 | -2.37114600 | 0.96796000  |
| Br | -5.30221900 | 3.87181200  | -0.85284600 |
| Br | -0.28594800 | 0.97770800  | -2.85770300 |
| K  | -3.59100300 | 1.60789200  | -2.12309900 |
| C  | 4.42782500  | 0.60683400  | 1.17713300  |
| C  | 5.63593500  | 0.39048200  | 0.44141500  |
| C  | 6.72044400  | -0.31082000 | 1.03401700  |
| C  | 6.52497800  | -0.79375000 | 2.30030700  |
| C  | 5.30784100  | -0.61223900 | 3.02443200  |
| C  | 4.25567400  | 0.08699400  | 2.48778700  |
| C  | 5.41740500  | 1.02701100  | -0.78527600 |
| H  | 7.66608100  | -0.44570000 | 0.52497900  |
| H  | 5.23037500  | -1.03299800 | 4.02098500  |
| H  | 3.32612500  | 0.24799100  | 3.02294100  |
| O  | 4.19268100  | 1.57993900  | -0.76339600 |
| N  | 3.56976700  | 1.35622300  | 0.46404000  |
| Cl | 7.84551700  | -1.68628800 | 3.11192200  |
| C  | 5.90824600  | 2.27488300  | -2.87331400 |
| C  | 6.66153700  | 2.45220900  | -4.02903700 |
| C  | 7.71362600  | 1.58019800  | -4.32410000 |
| C  | 8.00754100  | 0.52190800  | -3.46040000 |
| C  | 7.25996400  | 0.33653400  | -2.30111800 |
| C  | 6.20531300  | 1.21641300  | -1.99259100 |
| H  | 5.09688300  | 2.95593400  | -2.63995000 |
| H  | 6.42903200  | 3.27321100  | -4.70044200 |
| H  | 8.29917300  | 1.72172800  | -5.22776000 |
| H  | 8.81370600  | -0.16657500 | -3.69500400 |
| H  | 7.46845000  | -0.51185500 | -1.65864000 |

#### IM14

|   |            |             |             |
|---|------------|-------------|-------------|
| C | 1.39261500 | -0.14909900 | -0.29823600 |
| C | 1.04491500 | -1.33700500 | -0.81596100 |
| H | 1.81836200 | -2.01622200 | -1.16792000 |
| N | 0.49710300 | 0.86153600  | 0.09788700  |
| C | 0.50238100 | 2.09910000  | -0.72961500 |
| H | 0.41651200 | 1.73091300  | -1.75974300 |

|    |             |             |             |
|----|-------------|-------------|-------------|
| H  | 1.44884200  | 2.64431900  | -0.63218000 |
| C  | -3.06235300 | 0.19835400  | 3.12581200  |
| C  | -1.73366300 | 0.12348400  | 2.70953100  |
| C  | -1.03194400 | 1.31733400  | 2.57355100  |
| C  | -1.58367900 | 2.56150100  | 2.85279900  |
| C  | -2.91152900 | 2.60337300  | 3.27245000  |
| C  | -3.67701200 | 1.43249200  | 3.39999300  |
| H  | -3.63123000 | -0.72088900 | 3.23698800  |
| H  | -1.26352700 | -0.83292500 | 2.50430700  |
| H  | -0.99733800 | 3.46476800  | 2.73305700  |
| H  | -3.36915200 | 3.56505300  | 3.48552700  |
| C  | -5.13378400 | 1.50974700  | 3.77107300  |
| H  | -5.50021700 | 0.55756300  | 4.16715600  |
| H  | -5.31563000 | 2.29108500  | 4.51681900  |
| H  | -5.72352100 | 1.75896400  | 2.87660600  |
| S  | 0.69229900  | 1.23284100  | 1.96498100  |
| O  | 1.40555000  | 2.59006800  | 2.10444200  |
| O  | 1.36797700  | -0.04762400 | 2.49459200  |
| C  | -2.66263600 | 3.82298800  | -0.36939500 |
| C  | -1.86461900 | 4.87612100  | -0.04438600 |
| C  | -0.51952900 | 4.38920400  | -0.07943600 |
| C  | -0.58312700 | 3.07186700  | -0.42944500 |
| O  | -1.89676200 | 2.71062700  | -0.62042200 |
| H  | -3.73651500 | 3.67633700  | -0.41989300 |
| H  | -2.19770100 | 5.87426300  | 0.20231300  |
| H  | 0.38516800  | 4.93723000  | 0.14472500  |
| Au | -0.85177100 | -2.03585800 | -0.94555800 |
| Br | -3.26815900 | -2.89657400 | -0.99821500 |
| Br | -0.25434800 | -3.46319800 | 1.06359300  |
| Br | -6.06949400 | 2.38418800  | 0.00115100  |
| Br | -1.17886000 | -0.62309300 | -3.04925100 |
| K  | -3.91107900 | 0.41996000  | -1.11515300 |
| C  | 3.75867200  | -0.58348200 | 0.59416500  |
| C  | 5.02308400  | 0.00584100  | 0.30209800  |
| C  | 6.19276000  | -0.45712200 | 0.96220500  |
| C  | 6.03680000  | -1.50045700 | 1.83600200  |
| C  | 4.77114200  | -2.10159000 | 2.10618600  |
| C  | 3.61876600  | -1.65514400 | 1.50492400  |
| C  | 4.75711900  | 1.03074600  | -0.61645700 |
| H  | 7.16039900  | -0.00072300 | 0.80118400  |
| H  | 4.72635100  | -2.91825500 | 2.81830200  |
| H  | 2.64528600  | -2.07521500 | 1.72581400  |
| O  | 3.43819200  | 1.05489700  | -0.87771900 |
| N  | 2.81051900  | 0.06552300  | -0.11159800 |

|    |            |             |             |
|----|------------|-------------|-------------|
| Cl | 7.45977900 | -2.14136300 | 2.69930700  |
| C  | 4.99677500 | 3.23397200  | -1.72881800 |
| C  | 5.78453400 | 4.18421900  | -2.36857100 |
| C  | 7.14473200 | 3.94097700  | -2.58312800 |
| C  | 7.71876100 | 2.73895700  | -2.15966400 |
| C  | 6.94120300 | 1.78272000  | -1.51462200 |
| C  | 5.57212800 | 2.02525100  | -1.28787600 |
| H  | 3.94442900 | 3.42800000  | -1.55094000 |
| H  | 5.33859100 | 5.11756000  | -2.69778300 |
| H  | 7.75567500 | 4.68577600  | -3.08441300 |
| H  | 8.77097100 | 2.54268800  | -2.34072300 |
| H  | 7.38371400 | 0.83535400  | -1.22708700 |

#### TS14-15

|   |             |             |             |
|---|-------------|-------------|-------------|
| C | 1.33988400  | 0.19244600  | 0.24315300  |
| C | 1.23074200  | -0.99144600 | -0.44577600 |
| H | 2.14237500  | -1.52763500 | -0.70404900 |
| N | 0.20366700  | 1.00354300  | 0.51061300  |
| C | 0.25979600  | 2.32927800  | -0.16453700 |
| H | 0.40618400  | 2.08349200  | -1.22447500 |
| H | 1.12545700  | 2.91091600  | 0.17401900  |
| C | -3.61383900 | -0.48289600 | 2.88534000  |
| C | -2.23818100 | -0.32381600 | 2.71288000  |
| C | -1.73233700 | 0.97138600  | 2.71931800  |
| C | -2.52573900 | 2.09771400  | 2.90327900  |
| C | -3.89506200 | 1.90753900  | 3.07447700  |
| C | -4.46345200 | 0.62249100  | 3.05791700  |
| H | -4.03155200 | -1.48609100 | 2.88564200  |
| H | -1.58486300 | -1.18064600 | 2.58514600  |
| H | -2.08710300 | 3.08869600  | 2.89846400  |
| H | -4.53831400 | 2.77264300  | 3.20569000  |
| C | -5.95462200 | 0.45017800  | 3.18167300  |
| H | -6.22478800 | -0.59063900 | 3.38443800  |
| H | -6.36153700 | 1.07645600  | 3.98344800  |
| H | -6.43964300 | 0.75779800  | 2.24480700  |
| S | 0.06363300  | 1.19885000  | 2.43210200  |
| O | 0.50960100  | 2.61345100  | 2.83415900  |
| O | 0.82612600  | -0.03615200 | 2.95673900  |
| C | -3.06954300 | 3.75062500  | -0.26651400 |
| C | -2.45538500 | 4.81919100  | 0.30898300  |
| C | -1.08409100 | 4.44919100  | 0.48966300  |
| C | -0.94820700 | 3.18030700  | 0.00869800  |
| O | -2.16185800 | 2.73823900  | -0.46916200 |
| H | -4.09456900 | 3.52370300  | -0.53774400 |

|    |             |             |             |
|----|-------------|-------------|-------------|
| H  | -2.92627700 | 5.75302300  | 0.58173400  |
| H  | -0.29650700 | 5.03795700  | 0.93875900  |
| Au | -0.49836700 | -1.85407800 | -0.99215400 |
| Br | -2.74160600 | -2.93251000 | -1.55752000 |
| Br | -0.03384300 | -3.40601000 | 0.95894800  |
| Br | -6.29324500 | 1.89456000  | -0.56051100 |
| Br | -0.58082000 | -0.27211900 | -2.99602900 |
| K  | -3.69992900 | 0.32860200  | -1.34578700 |
| C  | 3.63462300  | -0.15143500 | 1.03858600  |
| C  | 4.88120400  | 0.24985200  | 0.50007000  |
| C  | 6.07847100  | -0.33120700 | 0.95876800  |
| C  | 5.98979900  | -1.34029700 | 1.89716600  |
| C  | 4.75155500  | -1.77490100 | 2.40474800  |
| C  | 3.56649400  | -1.18614100 | 1.99071200  |
| C  | 4.66668000  | 1.31789900  | -0.44938300 |
| H  | 7.04262000  | -0.00160700 | 0.59460900  |
| H  | 4.72763000  | -2.57059500 | 3.14160700  |
| H  | 2.60923500  | -1.45823400 | 2.41888100  |
| O  | 3.44454400  | 1.62268800  | -0.61121300 |
| N  | 2.55896600  | 0.62979300  | 0.68182500  |
| Cl | 7.48463700  | -2.11979700 | 2.48670300  |
| C  | 5.43891600  | 3.45910800  | -1.42267200 |
| C  | 6.37899500  | 4.21715700  | -2.11257400 |
| C  | 7.55144600  | 3.61913300  | -2.58491700 |
| C  | 7.78377000  | 2.25832700  | -2.36857900 |
| C  | 6.85858000  | 1.49488000  | -1.66087300 |
| C  | 5.68345700  | 2.09567100  | -1.17397300 |
| H  | 4.52338600  | 3.91141600  | -1.05669800 |
| H  | 6.19635500  | 5.27300100  | -2.28712200 |
| H  | 8.28004200  | 4.21207000  | -3.13001300 |
| H  | 8.68276100  | 1.78935700  | -2.75657400 |
| H  | 7.02527200  | 0.43076500  | -1.53417600 |

### IM15

|   |             |             |             |
|---|-------------|-------------|-------------|
| C | -1.52947700 | 0.23885900  | -0.28858800 |
| C | -1.45333100 | -0.99975400 | 0.34801200  |
| H | -2.37659800 | -1.49005300 | 0.64621900  |
| N | -0.32637000 | 0.96579000  | -0.55330200 |
| C | -0.32795700 | 2.32485900  | 0.06349100  |
| H | -0.47794400 | 2.13248200  | 1.13372900  |
| H | -1.17300500 | 2.92236600  | -0.29317000 |
| C | 3.35497600  | -0.74713700 | -2.99263300 |
| C | 1.99189900  | -0.52372900 | -2.79263100 |
| C | 1.54081900  | 0.79138000  | -2.82411300 |



|    |             |             |             |
|----|-------------|-------------|-------------|
| C  | 2.37677700  | 1.87654600  | -3.06159700 |
| C  | 3.73194800  | 1.62268300  | -3.26186200 |
| C  | 4.24573100  | 0.31549500  | -3.21927100 |
| H  | 3.72909400  | -1.76724700 | -2.97506600 |
| H  | 1.30669700  | -1.34860200 | -2.62684200 |
| H  | 1.98032800  | 2.88503000  | -3.07942300 |
| H  | 4.40598500  | 2.45522400  | -3.44155300 |
| C  | 5.72455700  | 0.07375900  | -3.37475700 |
| H  | 5.94124800  | -0.97752300 | -3.58682600 |
| H  | 6.14472100  | 0.68398500  | -4.18165700 |
| H  | 6.24644700  | 0.35109300  | -2.44829100 |
| S  | -0.23644500 | 1.10686500  | -2.50469800 |
| O  | -0.61856400 | 2.53263300  | -2.92945300 |
| O  | -1.07835100 | -0.09936100 | -2.96457800 |
| C  | 3.05484300  | 3.61980400  | 0.09831200  |
| C  | 2.47979400  | 4.68529100  | -0.52054200 |
| C  | 1.09538200  | 4.35847400  | -0.68487000 |
| C  | 0.91284000  | 3.11618700  | -0.15283700 |
| O  | 2.11201300  | 2.64886500  | 0.34173700  |
| H  | 4.06871300  | 3.37297400  | 0.38646100  |
| H  | 2.98272800  | 5.59057700  | -0.82992400 |
| H  | 0.32808100  | 4.95856100  | -1.15339900 |
| Au | 0.24804100  | -1.89000300 | 0.92662900  |
| Br | 2.45538300  | -3.04561800 | 1.49144000  |
| Br | -0.29816400 | -3.44431600 | -1.00228500 |
| Br | 6.20969700  | 1.54504700  | 0.39251500  |
| Br | 0.40043300  | -0.28397000 | 2.90529000  |
| K  | 3.45362000  | 0.17782400  | 1.14428800  |
| C  | -3.84589300 | 0.21266400  | -0.79930500 |
| C  | -5.08754500 | 0.88924800  | -0.54340400 |
| C  | -6.28025600 | 0.28370800  | -0.90335000 |
| C  | -6.26477200 | -0.97948900 | -1.50926800 |
| C  | -5.07101600 | -1.64269400 | -1.81663800 |
| C  | -3.87004100 | -1.05088600 | -1.47282200 |
| C  | -5.15190200 | 2.28475100  | 0.04864100  |
| H  | -7.22049600 | 0.79208000  | -0.72247300 |
| H  | -5.09262800 | -2.58555400 | -2.35160600 |
| H  | -2.93234200 | -1.47580400 | -1.81472200 |
| O  | -5.80546600 | 3.11406400  | -0.56645900 |
| N  | -2.69771300 | 0.85711300  | -0.50745500 |
| Cl | -7.80655900 | -1.73352300 | -1.94735300 |
| C  | -4.29057300 | 3.94841500  | 1.67177200  |
| C  | -3.69958600 | 4.29211200  | 2.88324400  |
| C  | -3.31358400 | 3.29168100  | 3.78314900  |

|   |             |            |            |
|---|-------------|------------|------------|
| C | -3.52105900 | 1.94597700 | 3.46928500 |
| C | -4.09505900 | 1.59880200 | 2.24690900 |
| C | -4.47930100 | 2.59682000 | 1.33650900 |
| H | -4.61170000 | 4.70818700 | 0.96676600 |
| H | -3.54306800 | 5.33753400 | 3.13282600 |
| H | -2.85779200 | 3.56151700 | 4.73168400 |
| H | -3.23597400 | 1.17040500 | 4.17381700 |
| H | -4.26687500 | 0.55154800 | 2.01516800 |

### TS15-16

|    |             |             |             |
|----|-------------|-------------|-------------|
| C  | -1.10883800 | 0.05382900  | 0.00282300  |
| C  | -0.86482600 | -0.89110700 | -1.04513600 |
| H  | -1.64437500 | -1.02982100 | -1.78961900 |
| N  | -0.14663700 | 0.09221900  | 1.07346300  |
| C  | -0.71163100 | -0.36559700 | 2.38513000  |
| H  | -1.16945200 | -1.33509400 | 2.16097600  |
| H  | -1.49820000 | 0.31619900  | 2.72325000  |
| C  | 4.38657700  | 0.61642300  | 1.34264800  |
| C  | 3.01161100  | 0.61881900  | 1.11353200  |
| C  | 2.25617800  | 1.63135000  | 1.70084000  |
| C  | 2.80993700  | 2.60994600  | 2.52020800  |
| C  | 4.18811500  | 2.58404300  | 2.72588000  |
| C  | 4.99947000  | 1.61055100  | 2.12347400  |
| H  | 4.99291500  | -0.16382100 | 0.89120400  |
| H  | 2.54507500  | -0.15753000 | 0.51690100  |
| H  | 2.18210600  | 3.36952200  | 2.97385900  |
| H  | 4.64411600  | 3.35119400  | 3.34500000  |
| C  | 6.49742200  | 1.66503900  | 2.25854100  |
| H  | 6.80203200  | 2.13847700  | 3.19715700  |
| H  | 6.94495500  | 0.66741400  | 2.20782600  |
| H  | 6.90570600  | 2.26119400  | 1.43117300  |
| S  | 0.49677000  | 1.84618300  | 1.22565200  |
| O  | -0.25450900 | 2.66042800  | 2.28980000  |
| O  | 0.47288800  | 2.35220800  | -0.25116800 |
| C  | 2.04861600  | -1.49459400 | 4.37801900  |
| C  | 1.68747300  | -0.48545900 | 5.21919300  |
| C  | 0.56437100  | 0.15736600  | 4.60515700  |
| C  | 0.32487200  | -0.51074400 | 3.43823400  |
| O  | 1.22945300  | -1.52784500 | 3.29194300  |
| H  | 2.82151400  | -2.24746100 | 4.40143200  |
| H  | 2.15817100  | -0.22878900 | 6.15769300  |
| H  | 0.01075300  | 1.01078100  | 4.97080100  |
| Au | 0.62104300  | -2.25916900 | -0.96114500 |
| Br | 2.73996000  | -3.60983600 | -1.12138400 |

|    |             |             |             |
|----|-------------|-------------|-------------|
| Br | 0.99459900  | -0.29062100 | -2.65942900 |
| Br | 5.67183700  | 3.88811600  | -1.16687400 |
| Br | -0.61574500 | -3.85733100 | 0.51954900  |
| K  | 2.78663500  | 2.81682800  | -1.58039600 |
| C  | -3.12282200 | 0.99921100  | -0.85609900 |
| C  | -4.51796900 | 0.94554100  | -0.56987900 |
| C  | -5.42871100 | 1.33023200  | -1.55268100 |
| C  | -4.96907000 | 1.80001700  | -2.78409100 |
| C  | -3.60837000 | 1.90571600  | -3.06385400 |
| C  | -2.68891100 | 1.49668900  | -2.10433800 |
| C  | -4.96145500 | 0.32075900  | 0.72409300  |
| H  | -6.49398400 | 1.24604100  | -1.37237100 |
| H  | -3.27421900 | 2.30227200  | -4.01622200 |
| H  | -1.62581300 | 1.62203700  | -2.27648100 |
| O  | -4.29473300 | -0.59622700 | 1.19196800  |
| N  | -2.22576800 | 0.70706300  | 0.14418900  |
| Cl | -6.15655400 | 2.27985600  | -4.02522500 |
| C  | -6.69626900 | 2.10726900  | 1.24778200  |
| C  | -7.82596600 | 2.51576600  | 1.95640200  |
| C  | -8.47007300 | 1.62605100  | 2.81846500  |
| C  | -7.97364300 | 0.32902900  | 2.98768700  |
| C  | -6.83736800 | -0.07668900 | 2.29564600  |
| C  | -6.19599900 | 0.80403400  | 1.40721100  |
| H  | -6.18870100 | 2.81149500  | 0.59636900  |
| H  | -8.19966800 | 3.52870400  | 1.83825400  |
| H  | -9.35482400 | 1.94379100  | 3.36320900  |
| H  | -8.47208700 | -0.36098900 | 3.66239400  |
| H  | -6.42847500 | -1.07338600 | 2.42519400  |

### IM16

|   |             |             |             |
|---|-------------|-------------|-------------|
| C | -1.32288700 | 0.03057100  | -0.65697000 |
| C | -1.33293300 | -1.07990700 | 0.35329700  |
| H | -2.13094200 | -0.97815700 | 1.08721100  |
| N | -0.05052300 | 0.64837200  | -0.89899100 |
| C | -0.09667200 | 2.10145200  | -0.55049700 |
| H | -0.35708200 | 2.11862900  | 0.51624600  |
| H | -0.90527400 | 2.59526200  | -1.10118200 |
| C | 4.05466700  | -1.14488000 | -2.35995000 |
| C | 2.66692600  | -1.00597100 | -2.37619500 |
| C | 2.13963600  | 0.20206500  | -2.81924200 |
| C | 2.92934200  | 1.25520500  | -3.26366900 |
| C | 4.31245300  | 1.08674400  | -3.24312500 |
| C | 4.89883000  | -0.10316900 | -2.78160200 |
| H | 4.48675900  | -2.08112300 | -2.01713800 |

|    |             |             |             |
|----|-------------|-------------|-------------|
| H  | 2.02001900  | -1.81955500 | -2.06632100 |
| H  | 2.47397000  | 2.17709000  | -3.60504600 |
| H  | 4.94932400  | 1.89961900  | -3.57999200 |
| C  | 6.39723000  | -0.23705000 | -2.70574900 |
| H  | 6.88341600  | 0.23248600  | -3.56751800 |
| H  | 6.76916300  | 0.26555000  | -1.80153400 |
| H  | 6.70635700  | -1.28588400 | -2.66177000 |
| S  | 0.31712300  | 0.41385700  | -2.81952500 |
| O  | -0.06952600 | 1.68597700  | -3.58588700 |
| O  | -0.35472800 | -0.93678500 | -3.13206700 |
| C  | 3.24742700  | 3.49229600  | -0.43168400 |
| C  | 2.72114000  | 4.39977000  | -1.29642900 |
| C  | 1.36798000  | 3.99597100  | -1.53248800 |
| C  | 1.15310800  | 2.87023800  | -0.79360700 |
| O  | 2.30129500  | 2.55013700  | -0.10067700 |
| H  | 4.23098100  | 3.34392400  | -0.00186900 |
| H  | 3.23756700  | 5.24896400  | -1.72109200 |
| H  | 0.64259800  | 4.46905700  | -2.17946200 |
| Au | 0.49043200  | -1.59806900 | 1.18385800  |
| Br | 2.70167100  | -2.79066700 | 1.57493100  |
| Br | -1.44298000 | -2.91193300 | -0.45060400 |
| Br | 6.42667400  | 1.79799400  | 0.76662000  |
| Br | 0.39031300  | 0.28119800  | 2.90460400  |
| K  | 3.67289000  | 0.46809700  | 1.46953200  |
| C  | -3.64216000 | -0.11601300 | -1.28742800 |
| C  | -4.66482400 | 0.24853500  | -0.38127100 |
| C  | -5.95704600 | -0.26395900 | -0.57588300 |
| C  | -6.21782600 | -1.11975400 | -1.63756300 |
| C  | -5.22304100 | -1.46541500 | -2.54885600 |
| C  | -3.94277200 | -0.94573800 | -2.38236200 |
| C  | -4.36512900 | 1.08326100  | 0.83060000  |
| H  | -6.74826600 | -0.00707800 | 0.11916100  |
| H  | -5.44609100 | -2.12043700 | -3.38386700 |
| H  | -3.15440800 | -1.16695000 | -3.09487500 |
| O  | -3.35296100 | 0.84317500  | 1.48823000  |
| N  | -2.35673900 | 0.44146500  | -1.26425100 |
| Cl | -7.87233900 | -1.77761800 | -1.84499100 |
| C  | -6.19448700 | 2.77312000  | 0.33838800  |
| C  | -7.00707500 | 3.82557800  | 0.75866500  |
| C  | -6.93620700 | 4.27988200  | 2.07720300  |
| C  | -6.04079300 | 3.69029600  | 2.97643800  |
| C  | -5.21871600 | 2.64975400  | 2.55743700  |
| C  | -5.29539800 | 2.17309100  | 1.23646400  |
| H  | -6.24305900 | 2.43411600  | -0.69119400 |

|   |             |            |            |
|---|-------------|------------|------------|
| H | -7.69253900 | 4.29159400 | 0.05681500 |
| H | -7.57505700 | 5.09560500 | 2.40443200 |
| H | -5.98487600 | 4.04622300 | 4.00114500 |
| H | -4.51100100 | 2.18697500 | 3.23734300 |

**TS16-17**

|    |             |             |             |
|----|-------------|-------------|-------------|
| C  | 0.81357700  | 0.98141700  | -0.75913900 |
| C  | 1.11662100  | -0.37551900 | -1.13314500 |
| H  | 1.80205100  | -0.49837000 | -1.96366100 |
| N  | -0.29684100 | 1.76059200  | -0.71018400 |
| C  | -0.07133700 | 3.22631200  | -0.61046300 |
| H  | 0.93974400  | 3.41266700  | -0.99062200 |
| H  | -0.10034800 | 3.56251300  | 0.43045700  |
| C  | -4.71167700 | 0.87038200  | -2.20067400 |
| C  | -3.49286400 | 0.72206100  | -1.54475000 |
| C  | -3.31103800 | 1.45285900  | -0.37688700 |
| C  | -4.26116100 | 2.30421000  | 0.17268100  |
| C  | -5.46588300 | 2.43106700  | -0.51418500 |
| C  | -5.71229900 | 1.71837400  | -1.69620000 |
| H  | -4.88809200 | 0.31204400  | -3.11583100 |
| H  | -2.72452000 | 0.06164000  | -1.93312800 |
| H  | -4.08437400 | 2.81382100  | 1.11127700  |
| H  | -6.23723800 | 3.07407400  | -0.10096300 |
| C  | -7.04522600 | 1.82793700  | -2.39373200 |
| H  | -6.95044700 | 1.66473100  | -3.47203100 |
| H  | -7.74108100 | 1.07251500  | -2.00623600 |
| H  | -7.50462400 | 2.80784300  | -2.23106200 |
| S  | -1.76367500 | 1.21045500  | 0.56433000  |
| O  | -1.59669200 | 2.22746700  | 1.69118800  |
| O  | -1.43765600 | -0.27385000 | 0.80745600  |
| C  | -2.03527600 | 4.63025200  | -3.26418600 |
| C  | -2.60710700 | 5.37154000  | -2.27549800 |
| C  | -1.97810200 | 4.95608200  | -1.05682600 |
| C  | -1.07145500 | 3.99502900  | -1.39856000 |
| O  | -1.09444500 | 3.78946800  | -2.75083000 |
| H  | -2.17426200 | 4.57806200  | -4.33327200 |
| H  | -3.37909900 | 6.11873200  | -2.39299100 |
| H  | -2.17407200 | 5.32217900  | -0.05840000 |
| Au | 0.41041200  | -2.08968200 | -0.33319600 |
| Br | -0.68676400 | -4.27438100 | 0.42576600  |
| Br | 1.80066500  | -1.93595900 | 1.78138100  |
| Br | -4.77893700 | 0.03563700  | 2.84471800  |
| Br | -0.76761600 | -2.03021900 | -2.60414000 |
| K  | -2.77554300 | -2.25432300 | 2.20800200  |

|    |            |             |             |
|----|------------|-------------|-------------|
| C  | 2.70682700 | 1.86687500  | 0.54767400  |
| C  | 4.07232000 | 2.18812800  | 0.35827000  |
| C  | 4.74348400 | 2.91807900  | 1.33879800  |
| C  | 4.08167300 | 3.26138700  | 2.51476300  |
| C  | 2.74475600 | 2.92292200  | 2.73432600  |
| C  | 2.05519300 | 2.23409000  | 1.74595900  |
| C  | 4.81233700 | 1.89723100  | -0.93738800 |
| H  | 5.77501600 | 3.21314200  | 1.18352900  |
| H  | 2.25438100 | 3.19565000  | 3.66190600  |
| H  | 1.01697200 | 1.96547400  | 1.91138600  |
| O  | 5.19517400 | 2.85572000  | -1.59328900 |
| N  | 2.06914900 | 1.17268300  | -0.47165400 |
| Cl | 4.96579200 | 4.16285700  | 3.77448500  |
| C  | 5.67722400 | 0.27253300  | -2.59986300 |
| C  | 5.97891000 | -1.02098600 | -3.01321800 |
| C  | 5.71086100 | -2.10545900 | -2.16939800 |
| C  | 5.14089300 | -1.89294600 | -0.91120100 |
| C  | 4.83280700 | -0.59737200 | -0.49630000 |
| C  | 5.09519200 | 0.49416000  | -1.33922400 |
| H  | 5.88266300 | 1.12901800  | -3.23369900 |
| H  | 6.42428200 | -1.18869400 | -3.98973700 |
| H  | 5.94877600 | -3.11538700 | -2.49223300 |
| H  | 4.93233200 | -2.73164800 | -0.25358400 |
| H  | 4.38521900 | -0.44377000 | 0.48027500  |

### IM17

|   |             |             |             |
|---|-------------|-------------|-------------|
| C | -0.25835000 | 0.01837300  | 1.29942600  |
| C | -1.46073500 | 0.49423600  | 0.60828000  |
| H | -2.06514400 | 1.24533400  | 1.11460200  |
| N | 0.25565300  | -0.73289100 | 2.21753300  |
| C | -0.54585000 | -1.62697500 | 3.10801500  |
| H | 0.03113200  | -1.69705100 | 4.03476800  |
| H | -0.60400000 | -2.60818700 | 2.62943300  |
| C | 3.77300600  | -3.33881300 | -0.34208300 |
| C | 3.35494300  | -2.18154900 | 0.31312500  |
| C | 2.75069300  | -2.34200000 | 1.55273400  |
| C | 2.54032400  | -3.57573800 | 2.16778900  |
| C | 2.95255400  | -4.70893000 | 1.47485500  |
| C | 3.56404900  | -4.61036700 | 0.21107700  |
| H | 4.29092400  | -3.22502700 | -1.29001700 |
| H | 3.57940000  | -1.21082900 | -0.12204300 |
| H | 2.10245000  | -3.64996900 | 3.15726300  |
| H | 2.81020800  | -5.68561200 | 1.92863300  |
| C | 3.98558400  | -5.84913200 | -0.53813100 |

|    |             |             |             |
|----|-------------|-------------|-------------|
| H  | 3.21931500  | -6.13248200 | -1.27135300 |
| H  | 4.91653400  | -5.68152200 | -1.08865200 |
| H  | 4.12859600  | -6.69940500 | 0.13549700  |
| S  | 2.20915500  | -0.85079400 | 2.46213300  |
| O  | 2.30961300  | -1.05680500 | 3.97048800  |
| O  | 2.69794300  | 0.43869300  | 1.79208300  |
| C  | -3.36810800 | 0.25637200  | 4.26215400  |
| C  | -4.09730900 | -0.64059300 | 3.54100500  |
| C  | -3.15048900 | -1.53697800 | 2.94868100  |
| C  | -1.91678200 | -1.12147100 | 3.36262700  |
| O  | -2.03633700 | -0.02012600 | 4.16893400  |
| H  | -3.62607800 | 1.10526300  | 4.87676900  |
| H  | -5.17256500 | -0.66518300 | 3.43624800  |
| H  | -3.35747600 | -2.37269600 | 2.29442300  |
| Au | -2.52712900 | -0.61940200 | -0.79458800 |
| Br | -3.92828300 | -1.90655600 | -2.48765400 |
| Br | -3.91504900 | 1.47004300  | -1.15869800 |
| Br | 5.72902800  | 0.06316900  | -1.13544100 |
| Br | -1.04289500 | -2.66934800 | -0.42750200 |
| K  | 4.63806800  | 2.14436100  | 0.88611900  |
| C  | 0.81557200  | 1.30702600  | -0.69021100 |
| C  | 1.42938900  | 2.57033900  | -0.68798300 |
| C  | 2.21845900  | 2.93896100  | -1.78575700 |
| C  | 2.35090400  | 2.07363800  | -2.86653500 |
| C  | 1.75638400  | 0.81415100  | -2.86279900 |
| C  | 0.98868300  | 0.42934800  | -1.76518100 |
| C  | 1.40237900  | 3.51103900  | 0.49389500  |
| H  | 2.70911600  | 3.90637700  | -1.79818400 |
| H  | 1.89432000  | 0.14035700  | -3.70037700 |
| H  | 0.52304600  | -0.55080900 | -1.74529600 |
| O  | 2.48482900  | 3.80229100  | 1.01160900  |
| N  | -0.02983300 | 0.94930600  | 0.40285300  |
| Cl | 3.30781900  | 2.59102900  | -4.27588900 |
| C  | 0.14227100  | 4.80625200  | 2.19226300  |
| C  | -1.02259400 | 5.40005700  | 2.66310500  |
| C  | -2.20622300 | 5.30266300  | 1.92106800  |
| C  | -2.22270000 | 4.60904800  | 0.70886000  |
| C  | -1.05802100 | 4.00532300  | 0.23627200  |
| C  | 0.13346000  | 4.09647400  | 0.97649200  |
| H  | 1.07107000  | 4.87811200  | 2.74820900  |
| H  | -1.01301700 | 5.94189400  | 3.60450100  |
| H  | -3.11553700 | 5.77053200  | 2.28831000  |
| H  | -3.13799600 | 4.53032200  | 0.13101900  |
| H  | -1.07991100 | 3.47805800  | -0.71216100 |

**TS17-18**

|    |             |             |             |
|----|-------------|-------------|-------------|
| C  | -0.52703600 | 0.41710500  | 1.16332700  |
| C  | -0.33235600 | -1.01861300 | 0.94027300  |
| H  | -1.03280900 | -1.67071400 | 1.45327900  |
| N  | 0.40135000  | 1.17076800  | 1.77929600  |
| C  | 1.52547300  | 0.47925300  | 2.44627100  |
| H  | 1.77590400  | 1.06550500  | 3.33609500  |
| H  | 2.40688700  | 0.44867100  | 1.79454500  |
| C  | 1.31260400  | 5.51050500  | -0.76603900 |
| C  | 0.54690200  | 4.80655900  | 0.16363200  |
| C  | 1.19843300  | 3.87553400  | 0.96383600  |
| C  | 2.56205800  | 3.61575500  | 0.88347800  |
| C  | 3.29789000  | 4.32775000  | -0.06130500 |
| C  | 2.69179900  | 5.28516400  | -0.89072100 |
| H  | 0.82858300  | 6.24842000  | -1.40036300 |
| H  | -0.51925700 | 4.97311900  | 0.27049900  |
| H  | 3.06106300  | 2.87391500  | 1.49938900  |
| H  | 4.36101400  | 4.12100500  | -0.14707400 |
| C  | 3.51765300  | 6.07267700  | -1.87903800 |
| H  | 2.89682400  | 6.50348300  | -2.67052500 |
| H  | 4.03697600  | 6.90026300  | -1.37850300 |
| H  | 4.28476100  | 5.44591100  | -2.34573200 |
| S  | 0.19041000  | 2.99984200  | 2.22931100  |
| O  | 0.86435100  | 3.08389200  | 3.59704300  |
| O  | -1.28786500 | 3.32436200  | 2.02926500  |
| C  | 0.24626300  | -2.34682900 | 4.23854400  |
| C  | 1.24542300  | -3.03356200 | 3.60491400  |
| C  | 1.84712700  | -2.10883100 | 2.71106300  |
| C  | 1.15724200  | -0.91525600 | 2.83924700  |
| O  | 0.18669900  | -1.06390100 | 3.80755400  |
| H  | -0.49146600 | -2.62676600 | 4.97585800  |
| H  | 1.50763200  | -4.07153300 | 3.74792600  |
| H  | 2.69497100  | -2.27171400 | 2.06030700  |
| Au | 0.64069500  | -1.86617300 | -0.64226800 |
| Br | 1.98714000  | -3.05171700 | -2.49766200 |
| Br | -0.22685800 | -4.10402500 | 0.16389100  |
| Br | 4.98818800  | 0.54656100  | 0.94070900  |
| Br | 1.31774800  | 0.40343900  | -1.61877800 |
| K  | 4.45797000  | -0.89650000 | -1.76680000 |
| C  | -2.48950100 | 1.38204200  | -0.05455500 |
| C  | -3.89823600 | 1.22088200  | 0.01879600  |
| C  | -4.72031100 | 2.07601400  | -0.72164800 |
| C  | -4.15518100 | 3.05017100  | -1.53771700 |



|    |             |             |             |
|----|-------------|-------------|-------------|
| C  | -2.77462200 | 3.18681500  | -1.66017400 |
| C  | -1.94689300 | 2.34909000  | -0.92216700 |
| C  | -4.50615300 | 0.20646300  | 0.95426100  |
| H  | -5.79830300 | 1.98705900  | -0.65357600 |
| H  | -2.35428400 | 3.93418700  | -2.32409900 |
| H  | -0.87075500 | 2.42183100  | -1.02504500 |
| O  | -4.03586400 | 0.04606800  | 2.07207500  |
| N  | -1.69306200 | 0.51054800  | 0.65083300  |
| Cl | -5.22981600 | 4.14210900  | -2.46819800 |
| C  | -6.50232300 | -1.17250100 | 1.49066000  |
| C  | -7.59368500 | -1.95740100 | 1.13294700  |
| C  | -7.87796200 | -2.18666900 | -0.21767000 |
| C  | -7.06759700 | -1.62710300 | -1.20705800 |
| C  | -5.98241700 | -0.82540800 | -0.85123000 |
| C  | -5.69258000 | -0.58764500 | 0.50221500  |
| H  | -6.25462200 | -0.99659700 | 2.53240200  |
| H  | -8.22200700 | -2.39573900 | 1.90330800  |
| H  | -8.72692900 | -2.80487200 | -0.49687200 |
| H  | -7.27716400 | -1.81624600 | -2.25603600 |
| H  | -5.34928600 | -0.40475900 | -1.62587800 |

**TS15-18**

|   |             |             |             |
|---|-------------|-------------|-------------|
| C | -1.09052400 | -0.33391500 | -1.40423000 |
| C | 0.15039000  | -1.07045500 | -1.52944000 |
| H | 0.48490800  | -1.24284400 | -2.54917300 |
| N | -2.12693100 | -0.76050400 | -2.21359500 |
| C | -1.86074900 | -1.61858800 | -3.36466900 |
| H | -1.20443000 | -1.13393400 | -4.10270300 |
| H | -2.82663800 | -1.79459800 | -3.85115400 |
| C | -4.88573100 | 1.51506800  | 1.25845000  |
| C | -4.24242000 | 1.51099500  | 0.01947100  |
| C | -4.44542500 | 0.40669000  | -0.79590600 |
| C | -5.24985300 | -0.67300600 | -0.44748400 |
| C | -5.87286700 | -0.64026500 | 0.79765000  |
| C | -5.70291600 | 0.45090500  | 1.66593200  |
| H | -4.74460000 | 2.36705800  | 1.91813000  |
| H | -3.59947700 | 2.33137300  | -0.28709200 |
| H | -5.39528900 | -1.50006300 | -1.13357300 |
| H | -6.50634100 | -1.47141000 | 1.09610200  |
| C | -6.41194400 | 0.48822800  | 2.99812100  |
| H | -7.42579100 | 0.89490400  | 2.88747300  |
| H | -6.50880100 | -0.51337500 | 3.42961800  |
| H | -5.88246100 | 1.12173800  | 3.71631800  |
| S | -3.66275000 | 0.36375400  | -2.46130800 |

|    |             |             |             |
|----|-------------|-------------|-------------|
| O  | -4.51155400 | -0.54396400 | -3.36475800 |
| O  | -3.22963500 | 1.74533100  | -2.93623600 |
| C  | -0.00423300 | -4.68596200 | -3.28700000 |
| C  | -0.61304600 | -4.89393600 | -2.08529700 |
| C  | -1.41561200 | -3.74032000 | -1.84149300 |
| C  | -1.23126700 | -2.90155400 | -2.91840300 |
| O  | -0.36861200 | -3.47677800 | -3.80864600 |
| H  | 0.69250200  | -5.25768600 | -3.88084200 |
| H  | -0.49134500 | -5.75111400 | -1.43947000 |
| H  | -2.04796000 | -3.54930100 | -0.98785200 |
| Au | 1.65905200  | -1.36155300 | -0.21524900 |
| Br | 3.71142100  | -1.62985400 | 1.30720000  |
| Br | 2.72466500  | 0.51077700  | -1.60380800 |
| Br | 5.26056400  | 4.28196700  | 0.03095700  |
| Br | 0.47551500  | -3.21650500 | 1.08525600  |
| K  | 5.22386900  | 1.27475500  | 0.68340900  |
| C  | -0.58627100 | 1.26262600  | 0.37965000  |
| C  | -0.31666300 | 2.66446200  | 0.43209100  |
| C  | 0.33786100  | 3.19403800  | 1.54236200  |
| C  | 0.65696000  | 2.36776600  | 2.62114100  |
| C  | 0.32853700  | 1.01075800  | 2.62970500  |
| C  | -0.27912300 | 0.46390200  | 1.50908000  |
| C  | -0.85673300 | 3.61257600  | -0.62752300 |
| H  | 0.58135500  | 4.25027400  | 1.58143500  |
| H  | 0.54878200  | 0.39455300  | 3.49426200  |
| H  | -0.56802700 | -0.58084100 | 1.51649000  |
| O  | -2.07567600 | 3.72916100  | -0.69094700 |
| N  | -1.22962300 | 0.77021000  | -0.72042000 |
| Cl | 1.47904100  | 3.06827500  | 4.03937400  |
| C  | -0.52865300 | 5.22385900  | -2.46886700 |
| C  | 0.27456400  | 5.99433300  | -3.29949100 |
| C  | 1.66772800  | 5.96094300  | -3.15415100 |
| C  | 2.25802800  | 5.15025900  | -2.18271000 |
| C  | 1.45427600  | 4.36422900  | -1.35581700 |
| C  | 0.05513200  | 4.39894700  | -1.48675000 |
| H  | -1.60949300 | 5.23522300  | -2.56026500 |
| H  | -0.17934600 | 6.62512600  | -4.05891700 |
| H  | 2.29380400  | 6.57189500  | -3.79917900 |
| H  | 3.33463400  | 5.12641600  | -2.04257200 |
| H  | 1.93443100  | 3.74227800  | -0.60815100 |

**IM18**

|   |             |             |            |
|---|-------------|-------------|------------|
| C | -0.40693600 | -0.82179100 | 0.71121600 |
| C | 0.81752700  | -1.69939500 | 0.78617600 |

|    |             |             |             |
|----|-------------|-------------|-------------|
| H  | 0.62494700  | -2.68880400 | 0.37546300  |
| N  | -0.39402800 | 0.05275700  | 1.83127500  |
| C  | 0.73497500  | -0.26066800 | 2.69135400  |
| H  | 0.46036900  | -0.17519400 | 3.74550400  |
| H  | 1.57448000  | 0.40436800  | 2.46348100  |
| C  | -3.95965900 | 3.83471100  | 1.76064300  |
| C  | -3.67113600 | 2.52836400  | 2.15474200  |
| C  | -2.33419100 | 2.16720400  | 2.26327000  |
| C  | -1.28627700 | 3.04096100  | 1.99906100  |
| C  | -1.60102600 | 4.33461300  | 1.58945600  |
| C  | -2.93737200 | 4.75148100  | 1.47332700  |
| H  | -4.99814600 | 4.13724500  | 1.65687800  |
| H  | -4.45782700 | 1.80565800  | 2.34150500  |
| H  | -0.25192800 | 2.72167600  | 2.05006600  |
| H  | -0.78996500 | 5.00852600  | 1.32696300  |
| C  | -3.25855400 | 6.16359500  | 1.04743800  |
| H  | -2.57731400 | 6.50337300  | 0.26032100  |
| H  | -4.28497700 | 6.24885700  | 0.67763300  |
| H  | -3.15065800 | 6.85821000  | 1.89079300  |
| S  | -1.97632900 | 0.45914600  | 2.83765000  |
| O  | -1.44895900 | 0.47408500  | 4.28441800  |
| O  | -3.12290500 | -0.48045500 | 2.46198000  |
| C  | 0.83583500  | -3.44397200 | 3.70470200  |
| C  | 2.22607400  | -3.25165500 | 3.66594900  |
| C  | 2.43871600  | -2.22230800 | 2.78109400  |
| C  | 1.14722900  | -1.71225800 | 2.28294200  |
| O  | 0.17116300  | -2.62241100 | 2.95570200  |
| H  | 0.25085100  | -4.16679900 | 4.26477000  |
| H  | 2.96283300  | -3.82851700 | 4.20648300  |
| H  | 3.38888100  | -1.77431900 | 2.52564300  |
| Au | 2.50438600  | -1.03694400 | -0.35431800 |
| Br | 4.51564900  | -0.37070000 | -1.87734100 |
| Br | 3.43478800  | -3.43984800 | 0.00527300  |
| Br | 1.68422600  | 4.72079000  | -0.73293600 |
| Br | 1.77715800  | 1.42818700  | -0.32267200 |
| K  | 3.88027700  | 2.93956900  | -2.21928400 |
| C  | -2.32556800 | -0.21380700 | -0.60543600 |
| C  | -3.58145600 | -0.83882400 | -0.82827600 |
| C  | -4.65551600 | -0.06072900 | -1.28427100 |
| C  | -4.47372900 | 1.28804200  | -1.55732800 |
| C  | -3.23318600 | 1.89940100  | -1.40862700 |
| C  | -2.16527800 | 1.14572200  | -0.93058900 |
| C  | -3.77377400 | -2.29225400 | -0.51122000 |
| H  | -5.63311000 | -0.50929900 | -1.41389400 |

|    |             |             |             |
|----|-------------|-------------|-------------|
| H  | -3.09963100 | 2.94814200  | -1.64960800 |
| H  | -1.18776400 | 1.60293000  | -0.82094700 |
| O  | -3.12829400 | -2.83672000 | 0.37528400  |
| N  | -1.22589400 | -0.97878800 | -0.24329000 |
| Cl | -5.87684900 | 2.26487200  | -2.12591600 |
| C  | -5.36905200 | -4.19615900 | -0.65807300 |
| C  | -6.26710100 | -5.00980400 | -1.34266000 |
| C  | -6.56414300 | -4.74990800 | -2.68446400 |
| C  | -5.95973100 | -3.67315300 | -3.33536400 |
| C  | -5.07454100 | -2.84423700 | -2.64414100 |
| C  | -4.77542000 | -3.09478300 | -1.29587000 |
| H  | -5.11041200 | -4.39476900 | 0.37704500  |
| H  | -6.73302500 | -5.85010200 | -0.83493300 |
| H  | -7.26058200 | -5.38856100 | -3.22137200 |
| H  | -6.17483200 | -3.47772900 | -4.38232400 |
| H  | -4.59886900 | -2.01644900 | -3.16042200 |

**TS15-20**

|   |             |             |             |
|---|-------------|-------------|-------------|
| C | -1.08777100 | 0.96416300  | -0.13020500 |
| C | -1.58210600 | -0.38724700 | 0.16494800  |
| H | -2.46781800 | -0.39034300 | 0.79502600  |
| N | 0.26043800  | 1.28072900  | 0.02582200  |
| C | 0.50302600  | 2.73267200  | 0.17180400  |
| H | -0.18907500 | 3.03299500  | 0.97068600  |
| H | 0.20586100  | 3.30942000  | -0.71455900 |
| C | 4.88761600  | 2.07359700  | -2.13726400 |
| C | 3.85803900  | 1.31266400  | -1.58929000 |
| C | 2.59189700  | 1.47519600  | -2.13666800 |
| C | 2.29769800  | 2.34968000  | -3.17983900 |
| C | 3.35064700  | 3.09802300  | -3.69893800 |
| C | 4.65479200  | 2.97176900  | -3.19003100 |
| H | 5.88341800  | 1.95351900  | -1.71937200 |
| H | 4.08110400  | 0.63687300  | -0.76615100 |
| H | 1.29459200  | 2.41981200  | -3.58561700 |
| H | 3.15743800  | 3.78311700  | -4.52007000 |
| C | 5.79265300  | 3.76669800  | -3.78091000 |
| H | 6.36117600  | 3.15519600  | -4.49374000 |
| H | 5.43312100  | 4.65032600  | -4.31715900 |
| H | 6.49368100  | 4.09264200  | -3.00578800 |
| S | 1.21504900  | 0.42911800  | -1.51770400 |
| O | 0.11826200  | 0.34709500  | -2.59735400 |
| O | 1.78851300  | -0.85534500 | -0.89059000 |
| C | 3.79619200  | 2.79652800  | 1.63390200  |
| C | 3.88546800  | 4.00705100  | 1.01640300  |

|    |             |             |             |
|----|-------------|-------------|-------------|
| C  | 2.65750100  | 4.18563200  | 0.30062000  |
| C  | 1.90600900  | 3.07248800  | 0.54314800  |
| O  | 2.58509900  | 2.22030300  | 1.36696500  |
| H  | 4.48339300  | 2.19071100  | 2.20495100  |
| H  | 4.73073900  | 4.67989200  | 1.04704500  |
| H  | 2.37478300  | 5.02658500  | -0.31815200 |
| Au | -0.61612400 | -2.16287200 | 0.28226600  |
| Br | 0.66698400  | -4.32022900 | 0.74088700  |
| Br | -1.44639000 | -3.06951300 | -1.93011700 |
| Br | 5.78503600  | -0.33734300 | 1.11959400  |
| Br | -0.10418900 | -1.21790500 | 2.61756200  |
| K  | 3.15090800  | -2.01920200 | 1.20690800  |
| C  | -3.17744600 | 1.33076900  | -0.80032800 |
| C  | -4.42602700 | 1.95930700  | -0.53233800 |
| C  | -5.58821900 | 1.27277600  | -0.84494500 |
| C  | -5.54229800 | -0.03353200 | -1.38162900 |
| C  | -4.34933000 | -0.65062100 | -1.70038400 |
| C  | -3.15194400 | 0.05150100  | -1.45756500 |
| C  | -4.55767500 | 3.36825200  | 0.01941600  |
| H  | -6.54886800 | 1.73967300  | -0.65496200 |
| H  | -4.32123700 | -1.62179100 | -2.18065600 |
| H  | -2.26593900 | -0.23383000 | -2.02453800 |
| O  | -5.28149500 | 4.13915400  | -0.59322700 |
| N  | -1.98687500 | 1.88216200  | -0.43176900 |
| Cl | -7.08274400 | -0.85711800 | -1.71634900 |
| C  | -3.71011400 | 5.13245300  | 1.54178600  |
| C  | -3.09353100 | 5.55038000  | 2.71707300  |
| C  | -2.64128900 | 4.60587200  | 3.64494300  |
| C  | -2.80977900 | 3.24093300  | 3.39674000  |
| C  | -3.41090300 | 2.82055200  | 2.21132200  |
| C  | -3.85919400 | 3.76194500  | 1.27101600  |
| H  | -4.08037100 | 5.84916100  | 0.81608700  |
| H  | -2.96779300 | 6.61082200  | 2.91556100  |
| H  | -2.16368700 | 4.93348900  | 4.56405700  |
| H  | -2.47725300 | 2.50738600  | 4.12536700  |
| H  | -3.55677300 | 1.75893200  | 2.03402800  |

## IM20

|   |             |             |             |
|---|-------------|-------------|-------------|
| C | 1.27134800  | 0.20889800  | 0.35608700  |
| C | 0.44746500  | -0.63207300 | -0.57827500 |
| H | -0.12643300 | -0.02413200 | -1.27838400 |
| N | 0.85388800  | 1.15449500  | 1.15313400  |
| C | 1.74984700  | 1.84247600  | 2.09248100  |
| H | 2.61210200  | 1.18372900  | 2.23729000  |

|    |             |             |             |
|----|-------------|-------------|-------------|
| H  | 1.21984400  | 1.94035700  | 3.04371400  |
| C  | -2.31588700 | 3.40092700  | -2.27780200 |
| C  | -2.13526500 | 2.53240500  | -1.20077400 |
| C  | -1.33223500 | 2.97968500  | -0.15751300 |
| C  | -0.71071600 | 4.22803000  | -0.12659100 |
| C  | -0.91644300 | 5.06377200  | -1.21622400 |
| C  | -1.72008400 | 4.66679800  | -2.30316100 |
| H  | -2.96752700 | 3.08757500  | -3.08733400 |
| H  | -2.63240300 | 1.57151300  | -1.17752400 |
| H  | -0.10461000 | 4.53867600  | 0.71669600  |
| H  | -0.45600800 | 6.04773200  | -1.21876300 |
| C  | -1.97202800 | 5.60903600  | -3.45293700 |
| H  | -2.87361200 | 6.20573600  | -3.26243600 |
| H  | -1.13945800 | 6.30534000  | -3.59544900 |
| H  | -2.13471200 | 5.06555400  | -4.38863000 |
| S  | -1.12881300 | 1.89592000  | 1.29605800  |
| O  | -0.95937200 | 2.67510100  | 2.59393900  |
| O  | -2.05295500 | 0.67848700  | 1.21324200  |
| C  | 3.05198400  | 4.62162900  | 0.20964500  |
| C  | 2.74704300  | 5.34486700  | 1.32252100  |
| C  | 2.16317700  | 4.41965800  | 2.24967400  |
| C  | 2.16783300  | 3.19981600  | 1.63611200  |
| O  | 2.71110900  | 3.31076300  | 0.38406000  |
| H  | 3.48311000  | 4.86918000  | -0.74844900 |
| H  | 2.90817500  | 6.40383000  | 1.46801600  |
| H  | 1.78448200  | 4.63281400  | 3.23959700  |
| Au | -1.01318300 | -1.87341600 | 0.35150800  |
| Br | -2.83517100 | -3.32866700 | 1.45792900  |
| Br | 0.61929100  | -2.38587900 | 2.22740400  |
| Br | -5.44851500 | 2.22880800  | -0.32817100 |
| Br | -2.45568200 | -1.53559300 | -1.73820700 |
| K  | -4.64408600 | -0.54277200 | 0.86846800  |
| C  | 2.80481800  | -0.89981000 | -0.72418000 |
| C  | 4.05135400  | -1.31094100 | -1.33077800 |
| C  | 3.95700300  | -1.82890300 | -2.59753100 |
| C  | 2.70902100  | -1.94166100 | -3.32003400 |
| C  | 1.51442200  | -1.76452100 | -2.72458500 |
| C  | 1.52653100  | -1.49748000 | -1.25256500 |
| C  | 5.43309200  | -1.31653900 | -0.69656400 |
| H  | 4.86875400  | -2.14725400 | -3.09292500 |
| H  | 0.57066000  | -1.91586700 | -3.23868200 |
| H  | 1.50384300  | -2.50418400 | -0.78417800 |
| O  | 6.13676800  | -2.28603700 | -0.94905200 |
| N  | 2.63340500  | -0.04657500 | 0.25440600  |

|    |            |             |             |
|----|------------|-------------|-------------|
| Cl | 2.82252900 | -2.37925100 | -5.05193000 |
| C  | 7.01038900 | -0.50246600 | 1.02077300  |
| C  | 7.57191200 | 0.49734700  | 1.80742200  |
| C  | 7.08123000 | 1.80493200  | 1.72812200  |
| C  | 6.02599500 | 2.10611500  | 0.86465300  |
| C  | 5.44659500 | 1.10144300  | 0.08995500  |
| C  | 5.93263100 | -0.21218500 | 0.16506500  |
| H  | 7.38942100 | -1.51845200 | 1.05222700  |
| H  | 8.39387100 | 0.26262700  | 2.47760700  |
| H  | 7.52371600 | 2.58838600  | 2.33757700  |
| H  | 5.65084300 | 3.12289900  | 0.79523700  |
| H  | 4.62409800 | 1.34618500  | -0.57105400 |

**TS16-19**

|   |             |             |             |
|---|-------------|-------------|-------------|
| C | -0.70910500 | 0.12729400  | 0.93858700  |
| C | -0.91717000 | 0.07566000  | -0.52943900 |
| H | -1.78779200 | 0.59216500  | -0.91001900 |
| N | 0.50805500  | -0.48693000 | 1.39098200  |
| C | 0.27035100  | -1.90122800 | 1.83842300  |
| H | -0.27329400 | -2.36301300 | 1.00649300  |
| H | -0.37659700 | -1.90432400 | 2.72372400  |
| C | 4.92933100  | 0.03224700  | 0.80565900  |
| C | 3.56064200  | 0.16674800  | 1.03980100  |
| C | 3.12065100  | 0.15856200  | 2.35991300  |
| C | 3.98206200  | 0.01937200  | 3.44104900  |
| C | 5.34657000  | -0.10579700 | 3.17930500  |
| C | 5.84021800  | -0.10139900 | 1.86579900  |
| H | 5.28353000  | 0.01502800  | -0.22171600 |
| H | 2.86382900  | 0.22790100  | 0.21090100  |
| H | 3.59248800  | -0.00062600 | 4.45342200  |
| H | 6.03719300  | -0.21599900 | 4.01132800  |
| C | 7.31450400  | -0.28035600 | 1.59380200  |
| H | 7.92356300  | 0.06008500  | 2.43713200  |
| H | 7.55115400  | -1.33878400 | 1.42382100  |
| H | 7.62714100  | 0.26809300  | 0.69955700  |
| S | 1.34454200  | 0.49404000  | 2.73462500  |
| O | 1.00974400  | -0.00197900 | 4.14908700  |
| O | 1.09966900  | 1.98790700  | 2.38941400  |
| C | 3.32395000  | -3.76037300 | 1.55859600  |
| C | 3.20921500  | -3.90213100 | 2.90960300  |
| C | 2.02519300  | -3.18789700 | 3.28131100  |
| C | 1.50862500  | -2.66788400 | 2.12823500  |
| O | 2.29731900  | -3.01733300 | 1.06794100  |
| H | 4.03260100  | -4.11441400 | 0.82571800  |

|    |             |             |             |
|----|-------------|-------------|-------------|
| H  | 3.87763100  | -4.44870000 | 3.55992800  |
| H  | 1.61257000  | -3.06184000 | 4.27238800  |
| Au | 0.47634100  | -0.67496800 | -1.79354900 |
| Br | 2.55058200  | -0.91775800 | -3.23146800 |
| Br | 0.49206300  | 1.95978200  | -1.42695900 |
| Br | 0.39305900  | 5.15763300  | -1.20032400 |
| Br | -0.14694900 | -3.14088000 | -1.99108100 |
| K  | 2.16452500  | 3.91767700  | 1.03023500  |
| C  | -2.76498600 | 1.16304200  | 1.41757500  |
| C  | -3.78548200 | 0.39580900  | 0.79270700  |
| C  | -5.03490200 | 0.99844100  | 0.55086800  |
| C  | -5.24672600 | 2.32505700  | 0.89113200  |
| C  | -4.25847300 | 3.07878500  | 1.52535700  |
| C  | -3.03725000 | 2.48268300  | 1.81251600  |
| C  | -3.58123600 | -1.03145500 | 0.40575300  |
| H  | -5.82240900 | 0.43360900  | 0.06653100  |
| H  | -4.44620300 | 4.11216900  | 1.79459300  |
| H  | -2.25845000 | 3.03570700  | 2.32671600  |
| O  | -2.50093800 | -1.43268200 | -0.06076800 |
| N  | -1.52518700 | 0.62955500  | 1.78516700  |
| Cl | -6.82760900 | 3.07939000  | 0.52383000  |
| C  | -5.68286400 | -1.88214400 | 1.54432600  |
| C  | -6.65053100 | -2.87367800 | 1.69507100  |
| C  | -6.62860000 | -4.00317900 | 0.87348600  |
| C  | -5.62696900 | -4.15223500 | -0.09178900 |
| C  | -4.64760800 | -3.17532100 | -0.23591100 |
| C  | -4.67607400 | -2.02248200 | 0.57216100  |
| H  | -5.69479900 | -1.01508500 | 2.19624800  |
| H  | -7.41927000 | -2.76551700 | 2.45453100  |
| H  | -7.38957100 | -4.77027800 | 0.98765400  |
| H  | -5.60962000 | -5.03183600 | -0.72844000 |
| H  | -3.85676600 | -3.28175700 | -0.97145300 |

### IM19

|   |             |            |             |
|---|-------------|------------|-------------|
| C | -1.25419600 | 1.36103100 | 0.29705800  |
| C | -1.67240800 | 0.04242500 | -0.33812200 |
| H | -2.19556700 | 0.21839300 | -1.28100100 |
| N | 0.09766000  | 1.60346600 | 0.57085900  |
| C | 0.30432400  | 2.47288800 | 1.75569000  |
| H | -0.15455200 | 1.91406200 | 2.58353200  |
| H | -0.23141100 | 3.42348700 | 1.66260900  |
| C | 3.72115800  | 0.42766700 | -2.63505600 |
| C | 2.44942300  | 0.93511200 | -2.36075400 |
| C | 2.36358000  | 2.01138000 | -1.48435700 |



|    |             |             |             |
|----|-------------|-------------|-------------|
| C  | 3.47152800  | 2.59593300  | -0.87551700 |
| C  | 4.72413400  | 2.06175500  | -1.16286300 |
| C  | 4.87145700  | 0.97174500  | -2.04193300 |
| H  | 3.81216300  | -0.41216500 | -3.31784900 |
| H  | 1.56316700  | 0.51114200  | -2.82025900 |
| H  | 3.36028000  | 3.42920400  | -0.19162700 |
| H  | 5.60213800  | 2.47928300  | -0.68024800 |
| C  | 6.23810000  | 0.39553800  | -2.30104400 |
| H  | 6.92061500  | 1.16370600  | -2.68417600 |
| H  | 6.66512400  | 0.01872100  | -1.36180800 |
| H  | 6.20015200  | -0.42277000 | -3.02601300 |
| S  | 0.69743200  | 2.66536700  | -1.09874600 |
| O  | 0.75652000  | 4.13542700  | -0.66328700 |
| O  | -0.31321100 | 2.21091800  | -2.16356100 |
| C  | 3.80862500  | 2.30180800  | 2.65852700  |
| C  | 3.68453700  | 3.65398000  | 2.74040100  |
| C  | 2.33842400  | 3.96059400  | 2.35864900  |
| C  | 1.72721900  | 2.77515700  | 2.07172300  |
| O  | 2.61813300  | 1.74239900  | 2.25817800  |
| H  | 4.63813100  | 1.61415200  | 2.77484000  |
| H  | 4.46173900  | 4.34831400  | 3.02683500  |
| H  | 1.87941000  | 4.93715300  | 2.29128900  |
| Au | -0.19600900 | -1.41194000 | -0.62065800 |
| Br | 1.70199100  | -3.10037500 | -1.00941000 |
| Br | -0.77679600 | -1.40721400 | -3.08349900 |
| Br | 6.34734600  | -0.24710300 | 1.63138000  |
| Br | 0.08672500  | -1.62622500 | 1.92505100  |
| K  | 3.34656000  | -1.00687900 | 1.14554200  |
| C  | -3.47505300 | 2.19149900  | 0.15665000  |
| C  | -4.33378800 | 1.04739500  | 0.20784800  |
| C  | -5.68965600 | 1.16696500  | -0.19709000 |
| C  | -6.16631900 | 2.37499600  | -0.65537100 |
| C  | -5.34545900 | 3.51363600  | -0.68999500 |
| C  | -4.03239400 | 3.41881500  | -0.26670000 |
| C  | -3.86082200 | -0.20978400 | 0.73054900  |
| H  | -6.33334500 | 0.29629600  | -0.19143900 |
| H  | -5.74508400 | 4.45802600  | -1.04341200 |
| H  | -3.38091100 | 4.28576100  | -0.27244500 |
| O  | -2.61941400 | -0.57605200 | 0.59900300  |
| N  | -2.14897700 | 2.26320900  | 0.53516700  |
| Cl | -7.85667100 | 2.50086500  | -1.21274400 |
| C  | -5.79748200 | -0.74561600 | 2.22287300  |
| C  | -6.52183900 | -1.67267200 | 2.96259900  |
| C  | -6.13585500 | -3.01720900 | 2.97145600  |

|   |             |             |            |
|---|-------------|-------------|------------|
| C | -5.01227200 | -3.43697900 | 2.25027100 |
| C | -4.27436100 | -2.51827200 | 1.51534200 |
| C | -4.66964100 | -1.16073500 | 1.47947400 |
| H | -6.07562400 | 0.30195600  | 2.25059600 |
| H | -7.37951700 | -1.34723700 | 3.54284800 |
| H | -6.70688100 | -3.73842000 | 3.54903300 |
| H | -4.71218000 | -4.47991900 | 2.26393000 |
| H | -3.40039900 | -2.83626400 | 0.95810100 |

Cartesian coordinates for the stationary points given in Fig. S4

**TS18-24**

|    |             |             |             |
|----|-------------|-------------|-------------|
| C  | -0.03751400 | -0.91243100 | 0.72048600  |
| C  | 0.71749500  | -2.20516700 | 0.62224200  |
| H  | 0.17688200  | -3.04627500 | 0.19857100  |
| N  | 0.51632700  | -0.16804600 | 1.79819500  |
| C  | 1.55415400  | -0.96055000 | 2.45842300  |
| H  | 1.43454200  | -0.94209500 | 3.54600600  |
| H  | 2.54706800  | -0.55900700 | 2.21082100  |
| C  | -1.29110500 | 4.66538500  | 2.49742500  |
| C  | -1.46902100 | 3.31054000  | 2.77621000  |
| C  | -0.36742600 | 2.47408400  | 2.64944900  |
| C  | 0.88809500  | 2.92504700  | 2.26176600  |
| C  | 1.03620700  | 4.28009200  | 1.97323700  |
| C  | -0.04496500 | 5.16834900  | 2.09481300  |
| H  | -2.14157300 | 5.33691900  | 2.57823600  |
| H  | -2.43774100 | 2.91095600  | 3.05543500  |
| H  | 1.72268800  | 2.24571700  | 2.13314500  |
| H  | 2.00184200  | 4.63406200  | 1.62244200  |
| C  | 0.13899100  | 6.63788200  | 1.80164600  |
| H  | 0.81976700  | 6.79163700  | 0.95799000  |
| H  | -0.81372200 | 7.12403900  | 1.56979000  |
| H  | 0.57277100  | 7.15615200  | 2.66697200  |
| S  | -0.60977000 | 0.70573000  | 3.08809200  |
| O  | 0.10331700  | 0.39014800  | 4.41631200  |
| O  | -2.07435200 | 0.31334500  | 2.89225200  |
| C  | 0.49254500  | -3.98488400 | 3.64827000  |
| C  | 1.84119500  | -4.31490200 | 3.22048600  |
| C  | 2.29214200  | -3.46822100 | 2.27161200  |
| C  | 1.42629900  | -2.34813200 | 1.85985300  |
| O  | -0.05443800 | -2.99633700 | 3.14459300  |
| H  | -0.04629900 | -4.57808200 | 4.39852700  |
| H  | 2.39639500  | -5.16253800 | 3.60265600  |
| H  | 3.26953300  | -3.56925300 | 1.81115100  |
| Au | 2.38214900  | -2.12558700 | -0.85409300 |

|    |             |             |             |
|----|-------------|-------------|-------------|
| Br | 4.10296800  | -2.09170600 | -2.78787500 |
| Br | 2.21338100  | -4.71191600 | -0.95232900 |
| Br | 3.94956400  | 3.45526100  | -0.73389100 |
| Br | 2.82581500  | 0.40123600  | -0.53907200 |
| K  | 4.90216300  | 1.23289500  | -2.83684300 |
| C  | -1.70253700 | 0.50611700  | -0.26141100 |
| C  | -3.11824200 | 0.45653500  | -0.34575900 |
| C  | -3.82670500 | 1.63545300  | -0.61778800 |
| C  | -3.14319800 | 2.82255200  | -0.84343600 |
| C  | -1.75359700 | 2.87521300  | -0.82829400 |
| C  | -1.04017200 | 1.71650900  | -0.53433600 |
| C  | -3.84958300 | -0.82696400 | -0.07816700 |
| H  | -4.90989600 | 1.62334600  | -0.64272300 |
| H  | -1.23225500 | 3.80411100  | -1.03114200 |
| H  | 0.04442000  | 1.73806900  | -0.52902300 |
| O  | -3.41897700 | -1.63774400 | 0.73043800  |
| N  | -0.97652000 | -0.66864200 | -0.09879600 |
| Cl | -4.08035300 | 4.32627800  | -1.17269100 |
| C  | -6.04376800 | -1.99238700 | -0.21270200 |
| C  | -7.22009600 | -2.34597500 | -0.86698500 |
| C  | -7.48409300 | -1.85126100 | -2.14843500 |
| C  | -6.56686700 | -1.00206400 | -2.76956600 |
| C  | -5.39538400 | -0.63187900 | -2.10702100 |
| C  | -5.12542300 | -1.11945700 | -0.81876900 |
| H  | -5.81084400 | -2.38281800 | 0.77271400  |
| H  | -7.93054900 | -3.01105600 | -0.38338100 |
| H  | -8.39969600 | -2.13213200 | -2.66226100 |
| H  | -6.76034100 | -0.62877700 | -3.77149100 |
| H  | -4.68041800 | 0.01712600  | -2.60249700 |

#### IM24

|   |             |             |             |
|---|-------------|-------------|-------------|
| C | 0.56509600  | 0.27767400  | -0.68998100 |
| C | -0.76067100 | -0.15587900 | -1.22195200 |
| H | -0.72630000 | -0.92735400 | -1.98792000 |
| N | 0.58912700  | 1.69729600  | -0.58651500 |
| C | -0.74598300 | 2.21298700  | -0.93604700 |
| H | -0.67284100 | 3.01226800  | -1.68098000 |
| H | -1.21468700 | 2.65094900  | -0.04698600 |
| C | 4.93284300  | 3.97134200  | 0.53755000  |
| C | 4.16962200  | 3.14048700  | -0.28251900 |
| C | 2.92397600  | 3.59665000  | -0.68911700 |
| C | 2.41110500  | 4.83443000  | -0.32112000 |
| C | 3.19136800  | 5.64355000  | 0.50236200  |
| C | 4.45853200  | 5.22776800  | 0.94157400  |

|    |             |             |             |
|----|-------------|-------------|-------------|
| H  | 5.90968800  | 3.63109200  | 0.87047700  |
| H  | 4.53110400  | 2.16980700  | -0.60241200 |
| H  | 1.44199800  | 5.16390200  | -0.68010700 |
| H  | 2.81084500  | 6.61606600  | 0.80335900  |
| C  | 5.30616200  | 6.12973500  | 1.80619700  |
| H  | 5.98459600  | 5.55314300  | 2.44275100  |
| H  | 5.92373200  | 6.79424500  | 1.18762000  |
| H  | 4.68886400  | 6.76480400  | 2.44972100  |
| S  | 1.92490200  | 2.52693400  | -1.79890400 |
| O  | 1.09196800  | 3.44498800  | -2.71352700 |
| O  | 2.80126200  | 1.40644300  | -2.36264500 |
| C  | -3.59804000 | 3.50750900  | -2.26703400 |
| C  | -3.73364300 | 2.01639500  | -2.36159600 |
| C  | -2.78023000 | 1.01060800  | -2.09138800 |
| C  | -1.54540500 | 1.04998700  | -1.46354700 |
| O  | -2.65691200 | 4.10455700  | -1.78855400 |
| H  | -4.45395200 | 4.04811600  | -2.71212600 |
| H  | -4.52236100 | 1.71685700  | -3.04562900 |
| H  | -3.09933800 | 0.01356900  | -2.39000000 |
| Au | -1.86626300 | -1.28738400 | 0.31334700  |
| Br | -3.24151800 | -2.69322600 | 2.04620400  |
| Br | -2.47843700 | -2.93885700 | -1.51282400 |
| Br | -5.52674300 | 2.08233500  | -0.58810600 |
| Br | -1.44595300 | 0.50933600  | 2.12900600  |
| K  | -4.79393500 | 0.20130400  | 2.01625000  |
| C  | 2.65152500  | -0.33890800 | 0.28379800  |
| C  | 3.80826900  | -1.07798100 | -0.07708200 |
| C  | 4.99054800  | -0.90376700 | 0.65503300  |
| C  | 5.01101400  | -0.04715800 | 1.74838400  |
| C  | 3.86827700  | 0.63120200  | 2.16152300  |
| C  | 2.69752500  | 0.48805900  | 1.42372900  |
| C  | 3.78831900  | -1.99256100 | -1.27337900 |
| H  | 5.88973000  | -1.43634600 | 0.36752500  |
| H  | 3.89377000  | 1.26879900  | 3.03855400  |
| H  | 1.79675400  | 1.00677900  | 1.73250700  |
| O  | 3.18068700  | -1.67915600 | -2.28579500 |
| N  | 1.45433100  | -0.58354900 | -0.37746200 |
| Cl | 6.54920900  | 0.18503700  | 2.65603800  |
| C  | 4.90940000  | -3.88988100 | -2.42487100 |
| C  | 5.55940900  | -5.12013600 | -2.43712100 |
| C  | 5.81893900  | -5.78643700 | -1.23480400 |
| C  | 5.42589700  | -5.21658500 | -0.02272100 |
| C  | 4.78949600  | -3.97448100 | -0.00725500 |
| C  | 4.53012900  | -3.29701400 | -1.20914200 |

|   |            |             |             |
|---|------------|-------------|-------------|
| H | 4.67984200 | -3.36694300 | -3.34763800 |
| H | 5.85968800 | -5.56523200 | -3.38181800 |
| H | 6.32083500 | -6.75038600 | -1.24454500 |
| H | 5.61071700 | -5.73929300 | 0.91167300  |
| H | 4.47358700 | -3.54484400 | 0.93801700  |

**TS24-25**

|    |             |             |             |
|----|-------------|-------------|-------------|
| C  | -0.64871900 | -0.78609500 | 0.39331900  |
| C  | 0.61943100  | -1.58750600 | 0.47992500  |
| H  | 0.55866600  | -2.56377100 | 0.00461100  |
| N  | -0.71185900 | -0.04006900 | 1.60709500  |
| C  | 0.25973200  | -0.52902700 | 2.50508200  |
| H  | 0.03920100  | -0.51135700 | 3.57577300  |
| H  | 1.28586100  | 0.42496200  | 2.71464400  |
| C  | -3.13668000 | 4.41204500  | 1.08345200  |
| C  | -3.16146900 | 3.03576400  | 1.31171400  |
| C  | -2.17582200 | 2.49882000  | 2.12763200  |
| C  | -1.18213400 | 3.26124000  | 2.73013400  |
| C  | -1.17937100 | 4.63154900  | 2.48009200  |
| C  | -2.15136600 | 5.22646400  | 1.65873000  |
| H  | -3.89975300 | 4.85604100  | 0.44980900  |
| H  | -3.92250400 | 2.39957200  | 0.87646100  |
| H  | -0.43283700 | 2.81170300  | 3.37246900  |
| H  | -0.41102600 | 5.24867400  | 2.93834900  |
| C  | -2.15195400 | 6.71872700  | 1.42957700  |
| H  | -2.67735400 | 6.98315200  | 0.50688300  |
| H  | -2.65448400 | 7.23933500  | 2.25530600  |
| H  | -1.13284600 | 7.11473400  | 1.36882100  |
| S  | -2.25098900 | 0.69856800  | 2.49354400  |
| O  | -1.89862600 | 0.47514200  | 3.96609000  |
| O  | -3.50656700 | 0.10363200  | 1.86552300  |
| C  | 1.93170400  | -2.08387000 | 4.99791300  |
| C  | 2.45163700  | -2.60866500 | 3.72479600  |
| C  | 2.05197000  | -2.38247300 | 2.44193600  |
| C  | 1.02986300  | -1.52972300 | 1.88494000  |
| O  | 1.07879100  | -1.22229700 | 5.14628400  |
| H  | 2.38074500  | -2.56619600 | 5.88940400  |
| H  | 3.24329600  | -3.34510900 | 3.85069300  |
| H  | 2.57194600  | -2.96430700 | 1.68410200  |
| Au | 2.25233200  | -0.74076000 | -0.74688100 |
| Br | 4.44236400  | 0.15691800  | -1.94648900 |
| Br | 3.11617800  | -3.12333100 | -1.01611800 |
| Br | 2.42331800  | 1.65640300  | 3.23845000  |
| Br | 1.29760700  | 1.66224500  | -0.74500200 |

|    |             |             |             |
|----|-------------|-------------|-------------|
| K  | 4.26024200  | 2.23180700  | 0.54784600  |
| C  | -2.59620500 | -0.27248700 | -0.96088100 |
| C  | -3.81730300 | -0.99330100 | -1.05222000 |
| C  | -4.95608100 | -0.34287700 | -1.54561300 |
| C  | -4.87549400 | 0.97250100  | -1.98386500 |
| C  | -3.67348300 | 1.67168700  | -1.95613500 |
| C  | -2.53958600 | 1.04862000  | -1.44079500 |
| C  | -3.90055100 | -2.39572700 | -0.52665300 |
| H  | -5.90649500 | -0.86224400 | -1.57220200 |
| H  | -3.62049400 | 2.68901700  | -2.32920400 |
| H  | -1.58667200 | 1.56736000  | -1.42867700 |
| O  | -3.17725000 | -2.76017400 | 0.39244700  |
| N  | -1.42888500 | -0.91869400 | -0.59568200 |
| Cl | -6.35476100 | 1.78557800  | -2.61117800 |
| C  | -5.36309500 | -4.39523300 | -0.31069500 |
| C  | -6.23707700 | -5.34981300 | -0.82234900 |
| C  | -6.62049200 | -5.29879200 | -2.16647600 |
| C  | -6.12653500 | -4.28940000 | -2.99456100 |
| C  | -5.26585800 | -3.31954300 | -2.47833600 |
| C  | -4.88108000 | -3.36039600 | -1.12894900 |
| H  | -5.03824700 | -4.43073100 | 0.72414000  |
| H  | -6.61670900 | -6.13778300 | -0.17758900 |
| H  | -7.29797800 | -6.04797800 | -2.56755900 |
| H  | -6.40823000 | -4.25692000 | -4.04338800 |
| H  | -4.87367900 | -2.54636800 | -3.13141400 |

**IM25**

|   |             |             |             |
|---|-------------|-------------|-------------|
| C | -1.16276900 | -0.61414700 | 0.29080800  |
| C | -0.17182300 | -1.67512000 | 0.68170200  |
| H | -0.60174300 | -2.67306200 | 0.67305700  |
| N | -0.91872700 | 0.49155000  | 1.20817200  |
| C | -0.02495900 | 0.13755900  | 2.11589100  |
| H | 0.21243300  | 0.81104200  | 2.92710900  |
| H | 3.23977800  | 1.48485200  | 2.85982300  |
| C | -0.09459800 | 4.68935800  | -1.46134200 |
| C | -0.95681200 | 3.88310300  | -0.72116000 |
| C | -0.50081900 | 3.42888600  | 0.51083200  |
| C | 0.75816000  | 3.71604800  | 1.02495200  |
| C | 1.60036000  | 4.51678500  | 0.25756400  |
| C | 1.18693700  | 5.01735600  | -0.98793300 |
| H | -0.42508400 | 5.06905100  | -2.42427900 |
| H | -1.94565000 | 3.62270200  | -1.08137000 |
| H | 1.08051200  | 3.33728100  | 1.98800100  |
| H | 2.59423700  | 4.73643900  | 0.63759400  |

|    |             |             |             |
|----|-------------|-------------|-------------|
| C  | 2.09482400  | 5.91462900  | -1.79248400 |
| H  | 1.93912300  | 5.78314100  | -2.86803700 |
| H  | 1.89923500  | 6.96977400  | -1.56005700 |
| H  | 3.14821700  | 5.72217000  | -1.56731400 |
| S  | -1.62478000 | 2.39490000  | 1.51990900  |
| O  | -1.28319100 | 2.53552900  | 3.00016900  |
| O  | -3.04570200 | 2.45822400  | 0.99318900  |
| C  | 2.88183500  | -0.20484600 | 3.74656300  |
| C  | 2.26457600  | -1.43563000 | 3.71958900  |
| C  | 1.31878200  | -1.88521600 | 2.76447900  |
| C  | 0.46195700  | -1.17683100 | 1.92879500  |
| O  | 2.47687600  | 0.83741800  | 3.05288200  |
| H  | 3.79771300  | -0.07659400 | 4.32514400  |
| H  | 2.72478900  | -2.19747700 | 4.34060100  |
| H  | 1.33069300  | -2.96139500 | 2.59351600  |
| Au | 1.46494100  | -1.86849200 | -0.74040000 |
| Br | 3.68420300  | -2.15481400 | -2.13352600 |
| Br | 1.47950200  | -4.33736400 | -0.13956500 |
| Br | 4.80692300  | 2.53583400  | 1.90484600  |
| Br | 1.35880000  | 0.61683800  | -1.43801300 |
| K  | 4.64117900  | 0.67190900  | -0.71983600 |
| C  | -3.04255800 | 0.11840300  | -1.01403700 |
| C  | -4.31826900 | 0.13768000  | -0.39936200 |
| C  | -5.32483900 | 0.94458200  | -0.94961600 |
| C  | -5.06993500 | 1.70428600  | -2.08234100 |
| C  | -3.83192000 | 1.66462100  | -2.71712900 |
| C  | -2.82776300 | 0.85694400  | -2.18848800 |
| C  | -4.56535300 | -0.59959400 | 0.88574300  |
| H  | -6.29700100 | 0.99424800  | -0.47312600 |
| H  | -3.65865400 | 2.24227800  | -3.61891400 |
| H  | -1.86374800 | 0.78293100  | -2.68227900 |
| O  | -3.69288000 | -0.63804500 | 1.74831500  |
| N  | -2.04186200 | -0.76142700 | -0.59685800 |
| Cl | -6.37108800 | 2.74733800  | -2.75403700 |
| C  | -6.25974300 | -1.53776400 | 2.44209600  |
| C  | -7.45192600 | -2.20033400 | 2.71557000  |
| C  | -8.27178100 | -2.62695400 | 1.66523900  |
| C  | -7.89454800 | -2.38756200 | 0.34259300  |
| C  | -6.70730200 | -1.70897100 | 0.06602800  |
| C  | -5.88115900 | -1.27337400 | 1.11477700  |
| H  | -5.60255800 | -1.21254800 | 3.24190700  |
| H  | -7.74350200 | -2.38947300 | 3.74494300  |
| H  | -9.20052400 | -3.14924700 | 1.87871700  |
| H  | -8.52209800 | -2.73148300 | -0.47471000 |

|   |             |             |             |
|---|-------------|-------------|-------------|
| H | -6.41197400 | -1.53966500 | -0.96434200 |
|---|-------------|-------------|-------------|

**TS25-26**

|    |             |             |             |
|----|-------------|-------------|-------------|
| C  | -1.03849700 | -0.47184000 | 0.50570700  |
| C  | 0.24563400  | -1.18799300 | 0.84018700  |
| H  | 0.15587500  | -2.27065200 | 0.84289400  |
| N  | -1.10934100 | 0.59361300  | 1.44551300  |
| C  | -0.05662100 | 0.52216200  | 2.31289900  |
| H  | 0.02952800  | 1.20651300  | 3.14535900  |
| H  | -1.08740900 | -3.50420300 | -2.00347800 |
| C  | -1.25673600 | 4.91209600  | -0.94217000 |
| C  | -1.89816000 | 3.83687000  | -0.32951500 |
| C  | -1.47673500 | 3.47694300  | 0.94346200  |
| C  | -0.45802400 | 4.12869500  | 1.62828500  |
| C  | 0.16713700  | 5.19665800  | 0.98814000  |
| C  | -0.21418600 | 5.59859700  | -0.30160800 |
| H  | -1.57224500 | 5.22064400  | -1.93511300 |
| H  | -2.70654700 | 3.30191100  | -0.81541300 |
| H  | -0.16575700 | 3.82300000  | 2.62722000  |
| H  | 0.96538800  | 5.72502800  | 1.50203200  |
| C  | 0.50149500  | 6.73214200  | -0.99519300 |
| H  | -0.14925600 | 7.23650000  | -1.71643600 |
| H  | 0.86270800  | 7.47649700  | -0.27843300 |
| H  | 1.37396000  | 6.35657000  | -1.54545200 |
| S  | -2.31137500 | 2.06392700  | 1.76818400  |
| O  | -2.20086600 | 2.22409700  | 3.28084600  |
| O  | -3.62607400 | 1.75292500  | 1.07042500  |
| C  | 2.56365900  | 0.82493100  | 4.41019200  |
| C  | 2.71074000  | -0.45432100 | 3.72714600  |
| C  | 1.96637900  | -0.98858100 | 2.71425700  |
| C  | 0.79342900  | -0.52958200 | 2.02228300  |
| O  | 1.66356900  | 1.64993100  | 4.27605000  |
| H  | 3.38957600  | 1.04290200  | 5.11986000  |
| H  | 3.57412400  | -1.03230600 | 4.04973600  |
| H  | 2.33508800  | -1.93928100 | 2.32781300  |
| Au | 1.53534500  | -1.04958800 | -0.95698200 |
| Br | 3.02789700  | -0.94010800 | -3.20829600 |
| Br | 1.45588000  | -3.68570100 | -1.01492200 |
| Br | -1.79003700 | -3.80001200 | -3.26130800 |
| Br | 1.52683200  | 1.49137100  | -0.83918300 |
| K  | 1.61533100  | -3.54873400 | -4.28631800 |
| C  | -3.00306300 | -0.33004100 | -0.89346200 |
| C  | -4.26813800 | -0.77564300 | -0.43947300 |
| C  | -5.42591200 | -0.28488000 | -1.06114000 |



|    |             |             |             |
|----|-------------|-------------|-------------|
| C  | -5.32639500 | 0.60962900  | -2.11644500 |
| C  | -4.08927100 | 1.02370000  | -2.60000300 |
| C  | -2.93248800 | 0.54012400  | -1.99360700 |
| C  | -4.37208000 | -1.66314200 | 0.76511600  |
| H  | -6.40195100 | -0.58631800 | -0.69952900 |
| H  | -4.02884300 | 1.70556800  | -3.44172200 |
| H  | -1.95505300 | 0.83016800  | -2.36798900 |
| O  | -3.57562900 | -1.54406600 | 1.68952800  |
| N  | -1.81350700 | -0.87921900 | -0.41275000 |
| Cl | -6.82844400 | 1.23596600  | -2.88641700 |
| C  | -5.84870900 | -3.13924200 | 2.11539800  |
| C  | -6.81717300 | -4.12935400 | 2.25001900  |
| C  | -7.39163700 | -4.70589000 | 1.11227900  |
| C  | -6.99420300 | -4.28675300 | -0.15858200 |
| C  | -6.03602700 | -3.28115000 | -0.29585200 |
| C  | -5.45747800 | -2.69510300 | 0.84138900  |
| H  | -5.37839600 | -2.69241500 | 2.98527100  |
| H  | -7.12351700 | -4.45672200 | 3.23978100  |
| H  | -8.14423000 | -5.48286500 | 1.21757300  |
| H  | -7.42855200 | -4.74203100 | -1.04431000 |
| H  | -5.72460600 | -2.96636600 | -1.28679000 |

**IM26**

|   |             |             |             |
|---|-------------|-------------|-------------|
| C | -0.53327200 | 0.23073800  | 0.74055800  |
| C | 0.69621200  | -0.32737600 | 1.40585200  |
| H | 0.53871400  | -1.34155100 | 1.77480800  |
| N | -0.75689700 | 1.46061500  | 1.26558700  |
| C | 0.18407700  | 1.73572300  | 2.25808000  |
| H | 0.12979600  | 2.64702400  | 2.83193100  |
| H | -0.82944600 | -1.38675800 | -0.41736200 |
| C | -0.23471100 | 4.97345300  | -2.13635900 |
| C | -1.06202000 | 4.12678900  | -1.40198100 |
| C | -0.90527700 | 4.11537500  | -0.02151800 |
| C | 0.02684500  | 4.89299600  | 0.65620900  |
| C | 0.84295000  | 5.72454300  | -0.10813800 |
| C | 0.73292000  | 5.77252700  | -1.50641300 |
| H | -0.34213300 | 5.01118700  | -3.21685200 |
| H | -1.81022200 | 3.50498500  | -1.88083000 |
| H | 0.11937500  | 4.86025900  | 1.73631900  |
| H | 1.57956500  | 6.34434000  | 0.39511300  |
| C | 1.65456800  | 6.64672600  | -2.32041900 |
| H | 1.17299200  | 6.99003100  | -3.24141900 |
| H | 1.98013400  | 7.52430800  | -1.75339300 |
| H | 2.55497600  | 6.08901500  | -2.60895000 |

|                      |             |             |             |
|----------------------|-------------|-------------|-------------|
| S                    | -1.98403600 | 2.99835000  | 0.95446800  |
| O                    | -2.14075200 | 3.52088200  | 2.37360100  |
| O                    | -3.15967000 | 2.53190800  | 0.11572800  |
| C                    | 2.52148300  | 2.88117700  | 4.36082500  |
| C                    | 2.75523600  | 1.45023700  | 4.19102200  |
| C                    | 2.15479700  | 0.56213000  | 3.34722300  |
| C                    | 1.07036700  | 0.71093300  | 2.40691200  |
| O                    | 1.62865900  | 3.56218900  | 3.86323100  |
| H                    | 3.26958200  | 3.37426900  | 5.01609800  |
| H                    | 3.57708100  | 1.06387300  | 4.79001300  |
| H                    | 2.57690100  | -0.44115600 | 3.35596900  |
| Au                   | 2.32112500  | -0.66619700 | 0.01552200  |
| Br                   | 4.27657600  | -1.19244200 | -1.63766400 |
| Br                   | 3.01344500  | -2.66821000 | 1.49069600  |
| Br                   | -0.44559900 | -3.36588100 | -1.37249000 |
| Br                   | 1.70879400  | 1.38942900  | -1.34599000 |
| K                    | 2.60552000  | -4.05972700 | -1.56991600 |
| C                    | -2.41859000 | -0.11960900 | -0.85985900 |
| C                    | -3.69661400 | -0.34449200 | -0.31602900 |
| C                    | -4.81656800 | -0.10333300 | -1.12135100 |
| C                    | -4.64711500 | 0.33754700  | -2.42866200 |
| C                    | -3.38543900 | 0.51768200  | -2.98377200 |
| C                    | -2.26530900 | 0.27080900  | -2.18977100 |
| C                    | -3.87539000 | -0.73120900 | 1.12843300  |
| H                    | -5.81374900 | -0.24502500 | -0.72168100 |
| H                    | -3.27683500 | 0.82992700  | -4.01635500 |
| H                    | -1.26552400 | 0.37045000  | -2.60052600 |
| O                    | -3.18129200 | -0.19440900 | 1.98469400  |
| N                    | -1.23090100 | -0.46176300 | -0.13150400 |
| Cl                   | -6.09894200 | 0.66070500  | -3.43177200 |
| C                    | -5.38263800 | -1.74355000 | 2.82080500  |
| C                    | -6.31854900 | -2.68778200 | 3.22922700  |
| C                    | -6.77344700 | -3.65667900 | 2.32786700  |
| C                    | -6.28995000 | -3.67743300 | 1.01834000  |
| C                    | -5.36492900 | -2.72085200 | 0.59935200  |
| C                    | -4.90745400 | -1.74292500 | 1.49801600  |
| H                    | -5.00532100 | -0.99339200 | 3.50814900  |
| H                    | -6.69234000 | -2.67488100 | 4.24924000  |
| H                    | -7.49998300 | -4.39811500 | 2.64944400  |
| H                    | -6.62836900 | -4.43998900 | 0.32286000  |
| H                    | -4.97905800 | -2.75272500 | -0.41444200 |
| <b>P<sub>b</sub></b> |             |             |             |
| C                    | -0.43629200 | -0.29715600 | 0.57356100  |

|    |             |             |             |
|----|-------------|-------------|-------------|
| C  | 0.24032700  | -1.12723600 | 1.42931900  |
| H  | 0.96040500  | -0.80967400 | 2.17257600  |
| N  | -1.27339700 | -1.11255900 | -0.19446100 |
| C  | -1.12831500 | -2.42259500 | 0.15454800  |
| H  | -1.69393800 | -3.21230300 | -0.31259500 |
| H  | -1.21209300 | 1.57303800  | 0.83594000  |
| C  | -4.35860100 | 2.72629500  | -0.16267200 |
| C  | -3.45676500 | 1.88956400  | -0.82339200 |
| C  | -3.59883000 | 0.51941000  | -0.65227300 |
| C  | -4.59962700 | -0.04934500 | 0.12648500  |
| C  | -5.48552000 | 0.80735400  | 0.77621900  |
| C  | -5.37737800 | 2.20200000  | 0.64603900  |
| H  | -4.27446700 | 3.80248000  | -0.28880900 |
| H  | -2.67568200 | 2.28012600  | -1.46746800 |
| H  | -4.69082100 | -1.12769400 | 0.20652900  |
| H  | -6.27939800 | 0.38577700  | 1.38735900  |
| C  | -6.33940100 | 3.11291500  | 1.37069400  |
| H  | -6.28654600 | 4.13727900  | 0.99031200  |
| H  | -7.37268100 | 2.76407300  | 1.26634700  |
| H  | -6.11657600 | 3.14509700  | 2.44502300  |
| S  | -2.44151000 | -0.60444600 | -1.54847400 |
| O  | -3.16690300 | -1.91141500 | -1.86835700 |
| O  | -1.69433100 | 0.19522800  | -2.60631900 |
| C  | -0.87184300 | -5.68900200 | 1.08073600  |
| C  | 0.09814900  | -4.94748500 | 1.87795000  |
| C  | 0.36035800  | -3.60932000 | 1.89535600  |
| C  | -0.17350000 | -2.48262000 | 1.17137700  |
| O  | -1.64596700 | -5.24382800 | 0.24117600  |
| H  | -0.87712800 | -6.78008500 | 1.29651200  |
| H  | 0.68018800  | -5.56674300 | 2.55795500  |
| H  | 1.13467400  | -3.31133500 | 2.60370500  |
| C  | 0.72923500  | 1.88228800  | 0.36898300  |
| C  | 1.97417500  | 1.45500700  | -0.15691500 |
| C  | 3.06102500  | 2.34335500  | -0.14019200 |
| C  | 2.92337500  | 3.63039500  | 0.35815800  |
| C  | 1.70731500  | 4.06883000  | 0.86958900  |
| C  | 0.63141800  | 3.18901200  | 0.88260300  |
| C  | 2.15444200  | 0.15350600  | -0.90205500 |
| H  | 4.01290600  | 2.02511100  | -0.55051300 |
| H  | 1.60407200  | 5.07349400  | 1.26495600  |
| H  | -0.31497300 | 3.51913000  | 1.30590800  |
| O  | 1.35484200  | -0.16662100 | -1.76829600 |
| N  | -0.42790600 | 1.09363400  | 0.40659600  |
| Cl | 4.33640400  | 4.74462400  | 0.34470000  |

|   |            |             |             |
|---|------------|-------------|-------------|
| C | 3.67978100 | -1.70265000 | -1.53897600 |
| C | 4.75623800 | -2.55317100 | -1.30759200 |
| C | 5.50957600 | -2.42593600 | -0.13562900 |
| C | 5.18072900 | -1.44571400 | 0.80268900  |
| C | 4.10825400 | -0.58470200 | 0.56682600  |
| C | 3.35051500 | -0.70262900 | -0.60893700 |
| H | 3.07176900 | -1.79328100 | -2.43312900 |
| H | 5.00857100 | -3.31869200 | -2.03617600 |
| H | 6.34888900 | -3.09204500 | 0.04621300  |
| H | 5.75901100 | -1.35035000 | 1.71767700  |
| H | 3.85407300 | 0.17246700  | 1.30179100  |

**7a**

|   |             |             |             |
|---|-------------|-------------|-------------|
| C | -0.51318700 | -0.18855600 | -0.61474900 |
| C | 0.79883000  | -0.66657000 | -0.26303300 |
| N | -1.33185200 | -1.30972100 | -0.72387700 |
| C | -0.59093400 | -2.44622800 | -0.50280800 |
| H | -1.07469400 | -3.41008300 | -0.56791900 |
| C | -4.95628900 | 1.55887600  | 0.69172600  |
| C | -4.16918100 | 0.90421800  | -0.25455800 |
| C | -4.05210700 | -0.47471100 | -0.14842900 |
| C | -4.67654400 | -1.22334600 | 0.84104700  |
| C | -5.45627200 | -0.54214200 | 1.77394900  |
| C | -5.60399900 | 0.85250300  | 1.71680500  |
| H | -5.06940600 | 2.63796300  | 0.63068400  |
| H | -3.65483800 | 1.44028600  | -1.04318700 |
| H | -4.56945400 | -2.30238500 | 0.86488500  |
| H | -5.96228300 | -1.10462500 | 2.55407900  |
| C | -6.42685000 | 1.58002600  | 2.75263600  |
| H | -6.82125400 | 2.52305500  | 2.36167900  |
| H | -7.27028500 | 0.97146100  | 3.09451000  |
| H | -5.81867700 | 1.81950400  | 3.63486900  |
| S | -3.05475700 | -1.37766900 | -1.40232600 |
| O | -3.37230600 | -2.87382000 | -1.31222700 |
| O | -3.06098800 | -0.62761100 | -2.72849700 |
| C | 2.83113800  | -5.24650500 | 0.50932700  |
| C | 1.68472300  | -4.41621000 | 0.11802900  |
| C | 1.76176400  | -3.06436700 | 0.15088200  |
| C | 0.71645400  | -2.12434800 | -0.19352500 |
| O | 3.90936500  | -4.82147300 | 0.89608500  |
| H | 2.65956900  | -6.34258100 | 0.43008900  |
| H | 0.78563500  | -4.93902000 | -0.20303300 |
| H | 2.71292600  | -2.64961000 | 0.47222100  |
| C | 0.06007800  | 1.98862000  | -0.60615100 |

|    |             |             |             |
|----|-------------|-------------|-------------|
| C  | 1.41714400  | 1.66003700  | -0.25219300 |
| C  | 2.35536100  | 2.72217100  | -0.09999500 |
| C  | 1.95194500  | 4.01832700  | -0.28335600 |
| C  | 0.62441100  | 4.35869100  | -0.62781900 |
| C  | -0.29785200 | 3.35272400  | -0.78528500 |
| C  | 1.79118100  | 0.29002400  | -0.07584400 |
| H  | 3.38306400  | 2.49802600  | 0.15788600  |
| H  | 0.35297900  | 5.39929300  | -0.76644600 |
| H  | -1.32529400 | 3.57235900  | -1.05708800 |
| N  | -0.90738300 | 1.04747100  | -0.78183800 |
| Cl | 3.14385400  | 5.35212300  | -0.08809000 |
| C  | 4.08832600  | -0.51320300 | -0.70596800 |
| C  | 5.39698400  | -0.86203400 | -0.36999000 |
| C  | 5.82835400  | -0.77544300 | 0.95500100  |
| C  | 4.94754200  | -0.33327600 | 1.94366100  |
| C  | 3.63857600  | 0.01823200  | 1.61029400  |
| C  | 3.19458700  | -0.07475300 | 0.28276100  |
| H  | 3.75254000  | -0.58486000 | -1.73685400 |
| H  | 6.07730400  | -1.20674500 | -1.14358300 |
| H  | 6.84482200  | -1.05550900 | 1.21620700  |
| H  | 5.27630300  | -0.26595200 | 2.97698300  |
| H  | 2.95263100  | 0.35849700  | 2.38137700  |

**TS20-22**

|   |             |             |             |
|---|-------------|-------------|-------------|
| C | -1.26768400 | 0.29867200  | -0.37884900 |
| C | -0.31903700 | -0.45287900 | 0.52913800  |
| H | 0.23561500  | 0.18974100  | 1.21426100  |
| N | -0.98004200 | 1.27217500  | -1.29795400 |
| C | -2.07160800 | 1.88330500  | -2.08661500 |
| H | -2.84486900 | 1.11242100  | -2.12687000 |
| H | -1.70211100 | 2.07007800  | -3.09540300 |
| C | 2.01217100  | 3.78310000  | 2.01223900  |
| C | 1.79667700  | 2.90163500  | 0.95315500  |
| C | 0.89025000  | 3.28244800  | -0.02772800 |
| C | 0.19874300  | 4.48868000  | -0.00831300 |
| C | 0.43100400  | 5.34433700  | 1.06652700  |
| C | 1.33249400  | 5.00763000  | 2.08968200  |
| H | 2.73922900  | 3.50741500  | 2.77100800  |
| H | 2.34239000  | 1.96753100  | 0.89876800  |
| H | -0.48230400 | 4.76068100  | -0.80663400 |
| H | -0.09157300 | 6.29633100  | 1.10172700  |
| C | 1.56213600  | 5.93792800  | 3.25544000  |
| H | 2.61347600  | 5.93985800  | 3.56049400  |
| H | 1.27131200  | 6.96491500  | 3.01447900  |

|    |             |             |             |
|----|-------------|-------------|-------------|
| H  | 0.97279400  | 5.62244400  | 4.12633900  |
| S  | 0.64657100  | 2.17707300  | -1.48941200 |
| O  | 0.39423100  | 3.02901400  | -2.73407900 |
| O  | 1.76266500  | 1.11623100  | -1.50914500 |
| C  | -3.39854700 | 4.44952600  | 0.07046400  |
| C  | -3.41060600 | 5.20429400  | -1.06295800 |
| C  | -2.88329700 | 4.36738500  | -2.10135900 |
| C  | -2.60348200 | 3.16139400  | -1.52497200 |
| O  | -2.91681100 | 3.19980400  | -0.19365300 |
| H  | -3.67113000 | 4.63793900  | 1.09773300  |
| H  | -3.74255200 | 6.22926700  | -1.15242200 |
| H  | -2.72386500 | 4.62903700  | -3.13811100 |
| Au | 1.19233700  | -1.60034200 | -0.48937100 |
| Br | 2.99022200  | -2.74160600 | -1.94628700 |
| Br | -0.86211600 | -3.25615900 | -1.27527100 |
| Br | 5.40727400  | 1.28469300  | 1.46115800  |
| Br | 3.00394500  | -0.61943200 | 1.09343300  |
| K  | 4.45818000  | 0.33097300  | -1.61343500 |
| C  | -2.60356300 | -1.01701700 | 0.73710600  |
| C  | -3.74202900 | -1.68929100 | 1.24203800  |
| C  | -3.53421800 | -2.57181700 | 2.30676100  |
| C  | -2.27093700 | -2.76882300 | 2.88779100  |
| C  | -1.13448900 | -2.17776600 | 2.37538200  |
| C  | -1.29436600 | -1.38552500 | 1.20643800  |
| C  | -5.13779000 | -1.69134800 | 0.65139700  |
| H  | -4.38502300 | -3.13033900 | 2.68086400  |
| H  | -0.15309200 | -2.36750700 | 2.79795500  |
| H  | -1.29904500 | -2.43523400 | 0.21121700  |
| O  | -5.72409200 | -2.76795100 | 0.64009700  |
| N  | -2.53793400 | -0.06962400 | -0.25091600 |
| Cl | -2.14085500 | -3.84719000 | 4.31191500  |
| C  | -6.94796600 | -0.64949300 | -0.66732700 |
| C  | -7.66946200 | 0.44557900  | -1.12940300 |
| C  | -7.27390600 | 1.73952600  | -0.77519600 |
| C  | -6.15237400 | 1.93099400  | 0.03378700  |
| C  | -5.41492500 | 0.83520200  | 0.48262100  |
| C  | -5.80801800 | -0.46512000 | 0.13545500  |
| H  | -7.24881000 | -1.66258600 | -0.91177200 |
| H  | -8.54208400 | 0.29423600  | -1.75861900 |
| H  | -7.84013400 | 2.59710700  | -1.12909100 |
| H  | -5.84812500 | 2.93587900  | 0.30993600  |
| H  | -4.54022400 | 0.99604300  | 1.10168300  |

IM22

|    |             |             |             |
|----|-------------|-------------|-------------|
| C  | -0.85226600 | 0.88827600  | -0.46209000 |
| C  | -0.26406400 | -0.06468600 | 0.53715300  |
| H  | 0.51799200  | 0.33695300  | 1.17822800  |
| N  | -0.19395700 | 1.74006900  | -1.25758200 |
| C  | -0.83749200 | 2.39410200  | -2.41811600 |
| H  | -1.53771300 | 1.66701400  | -2.83839300 |
| H  | -0.04322700 | 2.56576600  | -3.14781400 |
| C  | 3.23024100  | 3.18367800  | 2.44158300  |
| C  | 3.03107500  | 2.49902900  | 1.24226800  |
| C  | 1.91019400  | 2.84092500  | 0.49764600  |
| C  | 1.00983400  | 3.83935600  | 0.85922100  |
| C  | 1.23506600  | 4.49376600  | 2.06777600  |
| C  | 2.33987400  | 4.17468600  | 2.87670400  |
| H  | 4.11463100  | 2.93663700  | 3.02250000  |
| H  | 3.77647500  | 1.77247900  | 0.91847600  |
| H  | 0.16887500  | 4.10532000  | 0.22703700  |
| H  | 0.54610700  | 5.27365900  | 2.38076500  |
| C  | 2.56232900  | 4.88048900  | 4.19180400  |
| H  | 3.62792200  | 5.05500400  | 4.37111200  |
| H  | 2.04407300  | 5.84383300  | 4.22554900  |
| H  | 2.18854300  | 4.27314700  | 5.02647400  |
| S  | 1.71037700  | 2.02517100  | -1.14450900 |
| O  | 1.92113500  | 2.98574800  | -2.31438500 |
| O  | 2.41114200  | 0.65822500  | -1.14769500 |
| C  | -3.20218600 | 4.94498600  | -1.49431600 |
| C  | -2.19573300 | 5.80580700  | -1.81045800 |
| C  | -1.09064000 | 4.98992700  | -2.21979800 |
| C  | -1.50594700 | 3.69218100  | -2.11979500 |
| O  | -2.80253100 | 3.65426200  | -1.67373800 |
| H  | -4.21703300 | 5.07656900  | -1.15108600 |
| H  | -2.23334400 | 6.88526600  | -1.76920400 |
| H  | -0.11510800 | 5.31628500  | -2.55315100 |
| Au | 0.77243100  | -1.71104800 | -0.41895000 |
| Br | 2.19923800  | -3.56566300 | -1.49018100 |
| Br | -0.75978800 | -1.70538600 | -2.45086000 |
| Br | 6.27163000  | 1.00108800  | 0.75341000  |
| Br | 2.14616900  | -1.86280400 | 1.73971400  |
| K  | 4.55138600  | -1.15300600 | -0.70996200 |
| C  | -2.57745300 | -0.05301700 | 0.48826300  |
| C  | -3.92195800 | -0.37677700 | 0.79894400  |
| C  | -4.12667100 | -1.34104600 | 1.83165500  |
| C  | -3.04408700 | -1.85335300 | 2.51260300  |
| C  | -1.70548500 | -1.50147200 | 2.21939600  |
| C  | -1.48280100 | -0.60590100 | 1.19198600  |

|    |              |             |             |
|----|--------------|-------------|-------------|
| C  | -4.96324700  | 0.25528000  | 0.04254900  |
| H  | -5.12081000  | -1.69536900 | 2.06714600  |
| H  | -0.88566500  | -1.95626700 | 2.76558400  |
| H  | -3.62303400  | 1.14336500  | -1.03478100 |
| O  | -4.65699300  | 1.03732500  | -0.95152000 |
| N  | -2.19309400  | 0.82582500  | -0.48923200 |
| Cl | -3.32890100  | -3.05453100 | 3.81129600  |
| C  | -7.25999100  | 0.07588800  | -0.85002200 |
| C  | -8.63347600  | -0.05612500 | -0.67734400 |
| C  | -9.17395100  | -0.13318700 | 0.61007500  |
| C  | -8.33690700  | -0.07538500 | 1.72710400  |
| C  | -6.95816700  | 0.03338500  | 1.56319700  |
| C  | -6.40543800  | 0.09820600  | 0.26991600  |
| H  | -6.83321500  | 0.14271700  | -1.84490800 |
| H  | -9.28432500  | -0.09507100 | -1.54553800 |
| H  | -10.24784700 | -0.22844800 | 0.74234100  |
| H  | -8.75791800  | -0.10742000 | 2.72735500  |
| H  | -6.31881200  | 0.11968000  | 2.43477300  |

**TS22-23**

|   |             |            |             |
|---|-------------|------------|-------------|
| C | -0.90322600 | 0.97575900 | -0.55975100 |
| C | -0.26662600 | 0.03220900 | 0.42201000  |
| H | 0.52986100  | 0.45122300 | 1.03342200  |
| N | -0.28816800 | 1.84043500 | -1.37216500 |
| C | -0.97813400 | 2.48603900 | -2.50975900 |
| H | -1.68675700 | 1.75225400 | -2.90538000 |
| H | -0.21345800 | 2.66250400 | -3.26950600 |
| C | 3.22175100  | 3.36433000 | 2.21310900  |
| C | 2.99960700  | 2.66673600 | 1.02523300  |
| C | 1.85824200  | 2.99306700 | 0.30539700  |
| C | 0.95834900  | 3.98761600 | 0.67899600  |
| C | 1.20737100  | 4.65503100 | 1.87546500  |
| C | 2.33391200  | 4.35194100 | 2.66059800  |
| H | 4.12221200  | 3.13056200 | 2.77443500  |
| H | 3.74367600  | 1.94458500 | 0.68864100  |
| H | 0.10054400  | 4.24098100 | 0.06451200  |
| H | 0.51996700  | 5.43253800 | 2.19763100  |
| C | 2.58107900  | 5.07124100 | 3.96383400  |
| H | 3.65056300  | 5.23666000 | 4.12730000  |
| H | 2.07312900  | 6.04023600 | 3.99247300  |
| H | 2.21135000  | 4.47813300 | 4.81051600  |
| S | 1.62343500  | 2.16003800 | -1.32289300 |
| O | 1.77319200  | 3.11313300 | -2.50750000 |
| O | 2.34726500  | 0.80602300 | -1.33874000 |



|    |              |             |             |
|----|--------------|-------------|-------------|
| C  | -3.30248900  | 5.01556200  | -1.44277100 |
| C  | -2.34242700  | 5.88665300  | -1.85951800 |
| C  | -1.26026200  | 5.08163500  | -2.34489400 |
| C  | -1.64245100  | 3.77960100  | -2.18670400 |
| O  | -2.89541500  | 3.72857700  | -1.63154200 |
| H  | -4.28694400  | 5.13655000  | -1.01710200 |
| H  | -2.39641500  | 6.96592000  | -1.83536400 |
| H  | -0.32111400  | 5.41820800  | -2.76197800 |
| Au | 0.76933000   | -1.59236600 | -0.57283500 |
| Br | 2.19277000   | -3.42186900 | -1.68967200 |
| Br | -0.81319700  | -1.59913000 | -2.56584300 |
| Br | 6.24129000   | 1.21476000  | 0.44284000  |
| Br | 2.20819900   | -1.72681100 | 1.54384000  |
| K  | 4.52959300   | -0.98002000 | -0.96776800 |
| C  | -2.57546700  | -0.01928800 | 0.45875600  |
| C  | -3.90094700  | -0.36398700 | 0.78838100  |
| C  | -4.06523000  | -1.32718000 | 1.82085900  |
| C  | -2.95084900  | -1.81927000 | 2.47580400  |
| C  | -1.62891600  | -1.44481600 | 2.15271500  |
| C  | -1.44899700  | -0.53989500 | 1.11979000  |
| C  | -4.94882100  | 0.27194400  | 0.01568400  |
| H  | -5.04558700  | -1.70012500 | 2.08469000  |
| H  | -0.78815300  | -1.88534100 | 2.67807200  |
| H  | -3.48078500  | 1.15979600  | -1.00909100 |
| O  | -4.61889300  | 1.04459000  | -0.95747400 |
| N  | -2.24146500  | 0.87382700  | -0.53335700 |
| Cl | -3.18621100  | -3.02291200 | 3.78322700  |
| C  | -7.24483000  | 0.09485300  | -0.87950300 |
| C  | -8.61762100  | -0.05137900 | -0.71194000 |
| C  | -9.15863500  | -0.16252100 | 0.57283000  |
| C  | -8.32317200  | -0.12487900 | 1.69179200  |
| C  | -6.94480300  | -0.00252100 | 1.53157000  |
| C  | -6.39213000  | 0.09784500  | 0.24118000  |
| H  | -6.81549100  | 0.19036300  | -1.87101700 |
| H  | -9.26762700  | -0.07456500 | -1.58139700 |
| H  | -10.23192900 | -0.26907700 | 0.70171800  |
| H  | -8.74504200  | -0.18426000 | 2.69049500  |
| H  | -6.30712900  | 0.06679700  | 2.40592200  |

### IM23

|   |             |             |             |
|---|-------------|-------------|-------------|
| C | -0.80681400 | 0.86761100  | -0.55653100 |
| C | -0.27293700 | -0.06691600 | 0.47822700  |
| H | 0.48160700  | 0.35073800  | 1.14146300  |
| N | -0.13654300 | 1.71000400  | -1.33851500 |

|    |             |             |             |
|----|-------------|-------------|-------------|
| C  | -0.69885600 | 2.28855400  | -2.57677400 |
| H  | -1.23205400 | 1.48395000  | -3.09716100 |
| H  | 0.15991000  | 2.56968400  | -3.19216300 |
| C  | 2.97921400  | 3.31942500  | 2.55869200  |
| C  | 2.89646200  | 2.59660700  | 1.36764600  |
| C  | 1.85158600  | 2.91651500  | 0.51150500  |
| C  | 0.91914400  | 3.92241200  | 0.75240900  |
| C  | 1.02842100  | 4.61350400  | 1.95574100  |
| C  | 2.05136800  | 4.32079400  | 2.87589100  |
| H  | 3.80364300  | 3.09588000  | 3.23010000  |
| H  | 3.67164400  | 1.86618800  | 1.13017600  |
| H  | 0.13999700  | 4.16454200  | 0.03648000  |
| H  | 0.31364000  | 5.40096900  | 2.17855700  |
| C  | 2.14656900  | 5.06651600  | 4.18390800  |
| H  | 3.18977100  | 5.25487000  | 4.45647400  |
| H  | 1.62231300  | 6.02609200  | 4.14040700  |
| H  | 1.69947900  | 4.48067800  | 4.99759500  |
| S  | 1.79776900  | 2.05138200  | -1.11356000 |
| O  | 2.03003500  | 2.98625600  | -2.29776700 |
| O  | 2.52147700  | 0.70256200  | -1.04511000 |
| C  | -3.48287100 | 4.45082800  | -1.88537000 |
| C  | -2.61376400 | 5.45657000  | -2.17793000 |
| C  | -1.36368900 | 4.82848900  | -2.49546700 |
| C  | -1.56293100 | 3.48366800  | -2.37372900 |
| O  | -2.86104600 | 3.24154000  | -1.99897800 |
| H  | -4.52385200 | 4.41449600  | -1.60369100 |
| H  | -2.83223900 | 6.51505200  | -2.17992800 |
| H  | -0.44093800 | 5.30933500  | -2.79020000 |
| Au | 0.84141000  | -1.69218600 | -0.43831700 |
| Br | 2.34658000  | -3.51483600 | -1.44795300 |
| Br | -0.59038200 | -1.69812300 | -2.54195100 |
| Br | 6.16072000  | 1.17492100  | 0.97643100  |
| Br | 2.13594600  | -1.81582600 | 1.77133500  |
| K  | 4.66473700  | -1.11743800 | -0.52216900 |
| C  | -2.60798700 | -0.13644500 | 0.38772100  |
| C  | -3.93245800 | -0.47564000 | 0.69508600  |
| C  | -4.10501300 | -1.40194200 | 1.74307100  |
| C  | -3.00670400 | -1.88807700 | 2.44655100  |
| C  | -1.69399000 | -1.51315200 | 2.15455600  |
| C  | -1.50358800 | -0.62631900 | 1.09779900  |
| C  | -5.04678200 | 0.11828600  | -0.10163000 |
| H  | -5.09570700 | -1.75464400 | 1.99814600  |
| H  | -0.85608300 | -1.92005100 | 2.70945500  |
| H  | -2.79762900 | 1.21815400  | -1.22360100 |

|    |              |             |             |
|----|--------------|-------------|-------------|
| O  | -4.78387500  | 0.71101900  | -1.15191700 |
| N  | -2.14651600  | 0.75134100  | -0.59313400 |
| Cl | -3.29018600  | -3.05517000 | 3.77713700  |
| C  | -7.45309200  | -0.10405500 | -0.65177300 |
| C  | -8.79989800  | -0.15788400 | -0.30571600 |
| C  | -9.18186600  | -0.06390200 | 1.03627400  |
| C  | -8.21237600  | 0.08477100  | 2.02974900  |
| C  | -6.85982000  | 0.11538700  | 1.68898100  |
| C  | -6.46804800  | 0.01186600  | 0.34386800  |
| H  | -7.14286700  | -0.15596200 | -1.69035500 |
| H  | -9.55339000  | -0.26716400 | -1.08041900 |
| H  | -10.23382500 | -0.09929900 | 1.30556900  |
| H  | -8.50756100  | 0.17977100  | 3.07071100  |
| H  | -6.11556300  | 0.25648000  | 2.46625600  |

**8a**

|   |             |             |             |
|---|-------------|-------------|-------------|
| C | 0.52397800  | 0.38885400  | 0.63977800  |
| C | 0.66755600  | -0.61507200 | 1.56829300  |
| H | -0.76101400 | 0.60421400  | -1.03457000 |
| N | 1.30018500  | 1.54908500  | 0.51271200  |
| C | 0.55560400  | 2.84270400  | 0.62565300  |
| H | -0.30618600 | 2.88152600  | -0.05354900 |
| H | 1.26194200  | 3.62397000  | 0.33522500  |
| C | 3.93962500  | -2.09150000 | -1.46387600 |
| C | 3.02758000  | -1.04172900 | -1.57732100 |
| C | 3.37505100  | 0.18535600  | -1.03028500 |
| C | 4.58486200  | 0.40894800  | -0.38347200 |
| C | 5.47886500  | -0.65403800 | -0.28260400 |
| C | 5.16949000  | -1.91691700 | -0.81429100 |
| H | 3.69029400  | -3.05949500 | -1.89014600 |
| H | 2.08050400  | -1.16344600 | -2.09151600 |
| H | 4.82241400  | 1.39104900  | 0.01133400  |
| H | 6.43495200  | -0.49980900 | 0.21112000  |
| C | 6.13989100  | -3.06516100 | -0.67224200 |
| H | 5.92727900  | -3.86180400 | -1.39148900 |
| H | 7.17371000  | -2.73594500 | -0.82278300 |
| H | 6.08242800  | -3.50403100 | 0.33246500  |
| S | 2.19281700  | 1.58159100  | -1.17298100 |
| O | 2.96768000  | 2.91066500  | -1.19210200 |
| O | 1.16531900  | 1.24843900  | -2.28176500 |
| C | -1.35583600 | 2.88749600  | 3.66348700  |
| C | -0.27243000 | 3.52385500  | 4.18899900  |
| C | 0.67551600  | 3.63744200  | 3.12133000  |
| C | 0.09990000  | 3.06397200  | 2.02436400  |

|    |             |             |             |
|----|-------------|-------------|-------------|
| O  | -1.14934300 | 2.59931400  | 2.34852700  |
| H  | -2.31104400 | 2.58521400  | 4.06513100  |
| H  | -0.16115200 | 3.87437900  | 5.20553700  |
| H  | 1.65827000  | 4.08653400  | 3.16091100  |
| C  | -1.15884300 | -1.05890700 | 0.23717100  |
| C  | -2.26435700 | -1.77314300 | -0.27255700 |
| C  | -2.56563800 | -2.99596200 | 0.33611800  |
| C  | -1.82704700 | -3.45363700 | 1.43177600  |
| C  | -0.74864500 | -2.76012700 | 1.95475400  |
| C  | -0.39081600 | -1.54968500 | 1.33983800  |
| C  | -3.09389300 | -1.37227000 | -1.45848700 |
| H  | -3.38936100 | -3.58092700 | -0.05518600 |
| H  | -0.19548900 | -3.14882000 | 2.80283100  |
| H  | 1.42643100  | -0.64866300 | 2.33625500  |
| O  | -3.56253400 | -2.23823500 | -2.18807000 |
| N  | -0.58784900 | 0.12564700  | -0.16020800 |
| Cl | -2.30192900 | -5.01971400 | 2.19052500  |
| C  | -3.67308600 | 0.44054400  | -3.06320100 |
| C  | -3.99499500 | 1.75870600  | -3.37361200 |
| C  | -4.04954500 | 2.72212600  | -2.36132600 |
| C  | -3.78002600 | 2.36250900  | -1.03890400 |
| C  | -3.43915800 | 1.04538800  | -0.72782700 |
| C  | -3.37529900 | 0.07386500  | -1.74024200 |
| H  | -3.64693600 | -0.32571600 | -3.83114300 |
| H  | -4.20773600 | 2.03685900  | -4.40202700 |
| H  | -4.30518100 | 3.75028500  | -2.60318600 |
| H  | -3.83625800 | 3.10451400  | -0.24734000 |
| H  | -3.23528000 | 0.77350200  | 0.30277200  |

**TS18-21**

|   |             |             |             |
|---|-------------|-------------|-------------|
| C | -0.92486800 | -0.08966600 | 0.91620200  |
| C | -0.32365500 | -1.44878600 | 1.23887300  |
| H | -0.98863600 | -2.29154200 | 1.05414700  |
| N | -1.02189800 | 0.67254000  | 2.08015300  |
| C | -1.29180700 | -0.15392000 | 3.25699700  |
| H | -2.35359900 | -0.41130200 | 3.33925300  |
| H | -0.96234400 | 0.35572100  | 4.16453000  |
| C | 0.32298200  | 5.11246600  | -0.09041900 |
| C | -0.66926800 | 4.32210600  | 0.49176300  |
| C | -0.28297900 | 3.44516800  | 1.49602100  |
| C | 1.02640000  | 3.33459200  | 1.95338200  |
| C | 1.99742200  | 4.12297100  | 1.34554500  |
| C | 1.66118000  | 5.02164300  | 0.31698400  |
| H | 0.04834900  | 5.80777500  | -0.87924500 |

|    |             |             |             |
|----|-------------|-------------|-------------|
| H  | -1.70511600 | 4.37959800  | 0.17912300  |
| H  | 1.28799000  | 2.64651900  | 2.74911100  |
| H  | 3.03524400  | 4.01874800  | 1.64567600  |
| C  | 2.73534900  | 5.86356200  | -0.32334400 |
| H  | 3.09059700  | 6.63535700  | 0.37167400  |
| H  | 3.59956500  | 5.24326300  | -0.58697200 |
| H  | 2.36900700  | 6.36716400  | -1.22331300 |
| S  | -1.59265900 | 2.46493700  | 2.32254400  |
| O  | -1.45034300 | 2.56071200  | 3.84747400  |
| O  | -2.94253700 | 2.73191500  | 1.65979700  |
| C  | -0.00862800 | -3.49672700 | 3.51219200  |
| C  | 1.14405200  | -2.98361500 | 3.02547800  |
| C  | 0.85839300  | -1.60243600 | 2.69395500  |
| C  | -0.51109900 | -1.41169700 | 3.00750900  |
| O  | -1.01981700 | -2.57578100 | 3.53091100  |
| H  | -0.27988900 | -4.48300600 | 3.85956100  |
| H  | 2.07857700  | -3.50246700 | 2.87251100  |
| H  | 1.57703500  | -0.81067100 | 2.52649300  |
| Au | 1.20413300  | -1.96229300 | -0.24038600 |
| Br | 2.88443000  | -2.58714500 | -2.08693800 |
| Br | 0.01222800  | -4.22404000 | -0.55733000 |
| Br | 5.17978500  | 2.57524100  | -0.09130500 |
| Br | 2.52407700  | 0.21844800  | 0.20451800  |
| K  | 5.03221900  | -0.00207500 | -1.86816700 |
| C  | -2.07401400 | 1.03663300  | -0.88817100 |
| C  | -3.48800300 | 0.93787400  | -0.78291700 |
| C  | -4.28577900 | 1.83916700  | -1.50753200 |
| C  | -3.70207100 | 2.79265800  | -2.32677700 |
| C  | -2.32069900 | 2.86037700  | -2.48541100 |
| C  | -1.51870700 | 1.97064100  | -1.77834600 |
| C  | -4.14559100 | -0.07263600 | 0.10575000  |
| H  | -5.36403800 | 1.80147600  | -1.41063600 |
| H  | -1.87925200 | 3.59196700  | -3.15367000 |
| H  | -0.44012800 | 1.99294500  | -1.89571100 |
| O  | -3.62946800 | -0.42926200 | 1.16421500  |
| N  | -1.22061300 | 0.10481200  | -0.30173500 |
| Cl | -4.75092900 | 3.94889900  | -3.22095400 |
| C  | -6.31843600 | -1.11931900 | 0.71527100  |
| C  | -7.52929600 | -1.72674800 | 0.39750100  |
| C  | -7.88633600 | -1.91676700 | -0.94149500 |
| C  | -7.02906100 | -1.49439800 | -1.95901000 |
| C  | -5.82430100 | -0.86553800 | -1.64284300 |
| C  | -5.45997600 | -0.66777200 | -0.30112000 |
| H  | -6.01807600 | -0.97996900 | 1.74859000  |

|   |             |             |             |
|---|-------------|-------------|-------------|
| H | -8.19459600 | -2.05714700 | 1.19043800  |
| H | -8.82890900 | -2.39724000 | -1.18975000 |
| H | -7.29589100 | -1.65518900 | -2.99969900 |
| H | -5.15674200 | -0.55044100 | -2.43828100 |

## IM21

|    |             |             |             |
|----|-------------|-------------|-------------|
| C  | -0.64863000 | -0.22595500 | 1.10028100  |
| C  | -0.13014500 | -1.66297900 | 1.19742500  |
| H  | -0.97142500 | -2.33883600 | 1.02821400  |
| N  | -0.80050200 | 0.37798100  | 2.36660400  |
| C  | -1.37056500 | -0.43382700 | 3.42820900  |
| H  | -2.43135900 | -0.66600700 | 3.24347000  |
| H  | -1.31215400 | 0.13016800  | 4.37573800  |
| C  | 2.45841400  | 3.95050100  | 1.12292000  |
| C  | 1.15393100  | 3.50025300  | 1.32725500  |
| C  | 0.88570400  | 2.81246600  | 2.50217300  |
| C  | 1.84142500  | 2.55878300  | 3.48139600  |
| C  | 3.13377500  | 3.02436200  | 3.25362900  |
| C  | 3.46010700  | 3.72228400  | 2.07779300  |
| H  | 2.68596600  | 4.45709600  | 0.18895000  |
| H  | 0.38216200  | 3.68687200  | 0.59024500  |
| H  | 1.57784400  | 2.04256700  | 4.39771000  |
| H  | 3.89912000  | 2.84919300  | 4.00535400  |
| C  | 4.85754800  | 4.24638900  | 1.85391600  |
| H  | 4.94324900  | 5.28232000  | 2.20776200  |
| H  | 5.60275500  | 3.65247900  | 2.39288500  |
| H  | 5.11308700  | 4.24632200  | 0.78986400  |
| S  | -0.82720900 | 2.23785900  | 2.82195600  |
| O  | -1.02224000 | 2.10636800  | 4.34573000  |
| O  | -1.83560000 | 3.00068600  | 1.97377400  |
| C  | -0.09713600 | -3.80431000 | 3.82163800  |
| C  | 0.79763800  | -3.41038900 | 2.91613300  |
| C  | 0.52820500  | -1.97263100 | 2.59724400  |
| C  | -0.59616200 | -1.68127100 | 3.48725500  |
| O  | -0.98378800 | -2.72872400 | 4.14668900  |
| H  | -0.32050500 | -4.71969400 | 4.34605000  |
| H  | 1.57913800  | -4.01440300 | 2.47653100  |
| H  | 1.38413600  | -1.29060700 | 2.70784700  |
| Au | 1.18781000  | -2.12761000 | -0.40031700 |
| Br | 2.70082900  | -2.60017200 | -2.44425800 |
| Br | -0.44455800 | -3.91515500 | -1.12413900 |
| Br | 2.28056500  | 3.71282400  | -2.57621400 |
| Br | 2.90470200  | -0.49075400 | 0.57922200  |
| K  | 3.06971900  | 0.71142200  | -2.69189400 |

|    |             |             |             |
|----|-------------|-------------|-------------|
| C  | -1.67197300 | 1.28028200  | -0.48756800 |
| C  | -3.09058700 | 1.24476300  | -0.39828100 |
| C  | -3.82646700 | 2.31434100  | -0.94025500 |
| C  | -3.18086000 | 3.36960400  | -1.56401300 |
| C  | -1.79825200 | 3.37498900  | -1.72658300 |
| C  | -1.05928900 | 2.31705100  | -1.20782100 |
| C  | -3.82993200 | 0.11377700  | 0.24107700  |
| H  | -4.90670600 | 2.31990500  | -0.85667500 |
| H  | -1.29173000 | 4.17525800  | -2.25608700 |
| H  | 0.01564500  | 2.31332900  | -1.36487400 |
| O  | -3.39907700 | -0.46801000 | 1.24021300  |
| N  | -0.88319000 | 0.20065700  | -0.07306400 |
| Cl | -4.15824900 | 4.73149900  | -2.21140200 |
| C  | -6.05663500 | -0.97089000 | 0.49438900  |
| C  | -7.25706300 | -1.45846900 | -0.01218500 |
| C  | -7.53628700 | -1.34580200 | -1.37827000 |
| C  | -6.61190000 | -0.74153500 | -2.23205700 |
| C  | -5.41667900 | -0.23313700 | -1.72279000 |
| C  | -5.12956500 | -0.33890300 | -0.35186700 |
| H  | -5.81758100 | -1.06568000 | 1.54856900  |
| H  | -7.97502300 | -1.93016800 | 0.65309500  |
| H  | -8.47087000 | -1.73255800 | -1.77556100 |
| H  | -6.81871400 | -0.66658200 | -3.29576000 |
| H  | -4.69713000 | 0.22446600  | -2.39342600 |
